# Supplementary material for: The human olfactory transcriptome
Source: BMC Genomics. 2016 Aug 11;17:619. doi: 10.1186/s12864-016-2960-3 (PMC4982115; doi:10.1186/s12864-016-2960-3)
Supplement: Additional file 5: Table S7. — Expression profile of the OR repertoire. (XLSX 161 kb) [file 12864_2016_2960_MOESM5_ESM.xlsx]

## Sheet: Table S7
transcipt	geneName	Pseudo	locus	description	FC	aveCtrl	OE7_Unique	OE12_Unique	OE15_Unique	OE17_Unique	respiratory	adipose_Unique	adrenal_Unique	brain_Unique	breast_Unique	colon_Unique	heart_Unique	kidney_Unique	liver_Unique	lung_Unique	lymph_Unique	ovary_Unique	prostate_Unique	skeletal_Unique	testes_Unique	thyroid_Unique	whiteBlood_Unique
OR_ALL					8.75334	20.8458	136.091	238.631	262.372	92.7862	25.5463	11.2428	22.7239	18.0969	14.9341	9.80999	7.56541	15.7964	17.9075	43.7452	16.2382	20.7435	27.5198	5.98986	71.0341	16.7992	13.3857
OR_intact_all					21.6723	6.21538	88.8136	181.022	208.364	60.6082	3.90022	3.8281	7.42674	6.20638	4.88065	4.04628	2.96044	3.33855	1.87268	5.11952	3.82102	5.24136	13.2173	2.01097	23.575	8.29995	3.60116
OR_pseudo_all					3.26501	14.6304	47.2778	57.6094	54.0083	32.178	21.6461	7.41471	15.2972	11.8905	10.0534	5.7637	4.60497	12.4579	16.0348	38.6257	12.4172	15.5021	14.3025	3.9789	47.4591	8.4992	9.78451
OR_intact_ave							0.227175	0.463003	0.53293	0.155076	0.0100753	0.00982123	0.0190249	0.0161447	0.0125132	0.0103792	0.00760215	0.00856918	0.00482016	0.0131241	0.00980313	0.0134357	0.0338346	0.00517383	0.0618802	0.0213006	0.00924081
OR_pseudo_ave							0.102333	0.124696	0.116901	0.0696494	0.0571136	0.0160491	0.0331107	0.025737	0.0217607	0.0124756	0.00996746	0.0269651	0.0347074	0.0836054	0.026877	0.0335544	0.0309577	0.00861233	0.102725	0.0183965	0.0211786
OR10T2	OR10T2	0	chr1:158368314-158369256	olfactory receptor, family 10, subfamily T, member 2	0.747977	0.00401082	0.003	0.003	0.003	0.003	0.003	0.003	0.003	0.003	0.003	0.003	0.003	0.003	0.003	0.003	0.003	0.003	0.003	0.003	0.0191731	0.003	0.003
OR10K2	OR10K2	0	chr1:158389720-158390656	olfactory receptor, family 10, subfamily K, member 2	192.887	0.003	0.605581	0.156929	1.51643	0.0357091	0.0519125	0.003	0.003	0.003	0.003	0.003	0.003	0.003	0.003	0.003	0.003	0.003	0.003	0.003	0.003	0.003	0.003
OR10K1	OR10K1	0	chr1:158435351-158436290	olfactory receptor, family 10, subfamily K, member 1	141.009	0.003	0.438616	0.0390784	1.1077	0.106708	0.003	0.003	0.003	0.003	0.003	0.003	0.003	0.003	0.003	0.003	0.003	0.003	0.003	0.003	0.003	0.003	0.003
OR10R2	OR10R2	0	chr1:158449700-158450672	olfactory receptor, family 10, subfamily R, member 2	50.8537	0.003	0.157381	0.003	0.347564	0.1023	0.003	0.003	0.003	0.003	0.003	0.003	0.003	0.003	0.003	0.003	0.003	0.003	0.003	0.003	0.003	0.003	0.003
OR6Y1	OR6Y1	0	chr1:158516920-158517895	olfactory receptor, family 6, subfamily Y, member 1	84.9103	0.003	0.261276	0.0186608	0.654056	0.0849311	0.003	0.003	0.003	0.003	0.003	0.003	0.003	0.003	0.003	0.003	0.003	0.003	0.003	0.003	0.003	0.003	0.003
OR6P1	OR6P1	0	chr1:158532443-158533394	olfactory receptor, family 6, subfamily P, member 1	12.4083	0.00417657	0.003	0.003	0.198297	0.003	0.003	0.0218251	0.003	0.003	0.003	0.003	0.003	0.003	0.003	0.003	0.003	0.003	0.003	0.003	0.003	0.003	0.003
OR10X1	OR10X1	0	chr1:158548711-158549638	olfactory receptor, family 10, subfamily X, member 1	4.16003	0.003	0.003	0.003	0.0409204	0.003	0.003	0.003	0.003	0.003	0.003	0.003	0.003	0.003	0.003	0.003	0.003	0.003	0.003	0.003	0.003	0.003	0.003
OR10Z1	OR10Z1	0	chr1:158576228-158577167	olfactory receptor, family 10, subfamily Z, member 1	109.913	0.003	0.219308	0.840186	0.24168	0.0177846	0.003	0.003	0.003	0.003	0.003	0.003	0.003	0.003	0.003	0.003	0.003	0.003	0.003	0.003	0.003	0.003	0.003
OR6K2	OR6K2	0	chr1:158669470-158670442	olfactory receptor, family 6, subfamily K, member 2	44.7235	0.003	0.0524602	0.430813	0.0193091	0.0341	0.003	0.003	0.003	0.003	0.003	0.003	0.003	0.003	0.003	0.003	0.003	0.003	0.003	0.003	0.003	0.003	0.003
OR6K3	OR6K3	0	chr1:158686960-158687905	olfactory receptor, family 6, subfamily K, member 3	43.8164	0.0101987	0.217524	1.27955	0.21982	0.0705856	0.003	0.003	0.003	0.003	0.003	0.003	0.003	0.003	0.003	0.118179	0.003	0.003	0.003	0.003	0.003	0.003	0.003
OR6K6	OR6K6	0	chr1:158724710-158725634	olfactory receptor, family 6, subfamily K, member 6	32.306	0.003	0.003	0.378672	0.003	0.003	0.003	0.003	0.003	0.003	0.003	0.003	0.003	0.003	0.003	0.003	0.003	0.003	0.003	0.003	0.003	0.003	0.003
OR6N1	OR6N1	0	chr1:158735536-158736472	olfactory receptor, family 6, subfamily N, member 1	125.221	0.003	0.275264	0.51002	0.485259	0.232109	0.003	0.003	0.003	0.003	0.003	0.003	0.003	0.003	0.003	0.003	0.003	0.003	0.003	0.003	0.003	0.003	0.003
OR6N2	OR6N2	0	chr1:158746474-158747425	olfactory receptor, family 6, subfamily N, member 2	36.2064	0.003	0.107884	0.115424	0.158638	0.0525308	0.003	0.003	0.003	0.003	0.003	0.003	0.003	0.003	0.003	0.003	0.003	0.003	0.003	0.003	0.003	0.003	0.003
OR10J3	OR10J3	0	chr1:159283462-159284449	olfactory receptor, family 10, subfamily J, member 3	3.81422	0.003	0.003	0.0367706	0.003	0.003	0.003	0.003	0.003	0.003	0.003	0.003	0.003	0.003	0.003	0.003	0.003	0.003	0.003	0.003	0.003	0.003	0.003
OR10J1	OR10J1	0	chr1:159409581-159410508	olfactory receptor, family 10, subfamily J, member 1	2.34473	0.0708349	0.278707	0.198507	0.184142	0.003	0.003	0.112758	0.003	0.003	0.003	0.003	0.003	0.003	0.003	0.003	0.003	0.003	0.003	0.003	0.9786	0.003	0.003
OR10J5	OR10J5	0	chr1:159504870-159505797	olfactory receptor, family 10, subfamily J, member 5	6.57415	0.00877043	0.111483	0.0397013	0.0613805	0.0180677	0.003	0.003	0.003	0.003	0.003	0.003	0.003	0.003	0.0953268	0.003	0.003	0.003	0.003	0.003	0.003	0.003	0.003
OR2B11	OR2B11	0	chr1:247614333-247615284	olfactory receptor, family 2, subfamily B, member 11	168.68	0.0276116	2.48133	15.4476	0.456083	0.245144	0.003	0.003	0.003	0.003	0.003	0.003	0.003	0.003	0.003	0.003	0.003	0.003	0.003	0.003	0.003	0.003	0.396786
OR2W5	OR2W5	0	chr1:247654429-247655389	olfactory receptor, family 2, subfamily W, member 5	59.1977	0.00749133	0.692859	0.361323	0.529286	0.19041	0.003	0.003	0.003	0.003	0.003	0.003	0.003	0.003	0.003	0.003	0.003	0.003	0.003	0.003	0.0748612	0.003	0.003
OR2C3	OR2C3	0	chr1:247694853-247695813	olfactory receptor, family 2, subfamily C, member 3	4.87646	0.0417036	0.106594	0.152136	0.450873	0.10386	0.003	0.003	0.003	0.003	0.104553	0.003	0.003	0.003	0.003	0.003	0.003	0.003	0.003	0.003	0.393021	0.003	0.130683
OR2G2	OR2G2	0	chr1:247751661-247752612	olfactory receptor, family 2, subfamily G, member 2	1	0.003	0.003	0.003	0.003	0.003	0.003	0.003	0.003	0.003	0.003	0.003	0.003	0.003	0.003	0.003	0.003	0.003	0.003	0.003	0.003	0.003	0.003
OR2G3	OR2G3	0	chr1:247768887-247769814	olfactory receptor, family 2, subfamily G, member 3	8.49494	0.005259	0.003	0.119104	0.0204602	0.0361354	0.003	0.003	0.003	0.003	0.003	0.003	0.003	0.003	0.003	0.003	0.003	0.003	0.003	0.003	0.039144	0.003	0.003
OR13G1	OR13G1	0	chr1:247835419-247836343	olfactory receptor, family 13, subfamily G, member 1	5.8944	0.015629	0.167925	0.0797204	0.102709	0.0181399	0.003	0.003	0.003	0.003	0.109795	0.003	0.003	0.003	0.003	0.003	0.003	0.003	0.003	0.003	0.0982689	0.003	0.003
OR6F1	OR6F1	0	chr1:247875133-247876057	olfactory receptor, family 6, subfamily F, member 1	28.5189	0.0310648	0.727673	0.617833	1.88985	0.308378	0.003	0.003	0.003	0.003	0.003	0.003	0.003	0.003	0.003	0.003	0.003	0.003	0.003	0.003	0.452037	0.003	0.003
OR14A2	OR14A2	0	chr1:247886403-247887345	olfactory receptor, family 14, subfamily A, member 2	0.16199	0.0185197	0.003	0.003	0.003	0.003	0.003	0.003	0.0434109	0.003	0.003	0.003	0.003	0.003	0.003	0.003	0.003	0.003	0.003	0.003	0.210904	0.003	0.003
OR14K1	OR14K1	0	chr1:247901916-247902858	olfactory receptor, family 14, subfamily K, member 1	8.21179	0.00626118	0.0546031	0.0778514	0.0200615	0.0531457	0.003	0.003	0.003	0.003	0.003	0.003	0.003	0.003	0.003	0.003	0.003	0.0198327	0.003	0.003	0.0383461	0.003	0.003
OR1C1	OR1C1	0	chr1:247920766-247921708	olfactory receptor, family 1, subfamily C, member 1	3.41648	0.0627283	0.218412	0.525497	0.0601846	0.0531457	0.003	0.003	0.003	0.003	0.003	0.003	0.003	0.003	0.003	0.003	0.003	0.003	0.003	0.003	0.958653	0.003	0.003
OR14A16	OR14A16	0	chr1:247978104-247979031	olfactory receptor, family 14, subfamily A, member 16	22.7438	0.003	0.0557415	0.178656	0.0204602	0.0180677	0.003	0.003	0.003	0.003	0.003	0.003	0.003	0.003	0.003	0.003	0.003	0.003	0.003	0.003	0.003	0.003	0.003
OR11L1	OR11L1	0	chr1:248004232-248005198	olfactory receptor, family 11, subfamily L, member 1	7.86084	0.00970224	0.003	0.150983	0.11673	0.034358	0.003	0.003	0.003	0.003	0.003	0.003	0.003	0.003	0.003	0.003	0.003	0.003	0.003	0.003	0.0557026	0.0575332	0.003
OR2W3	OR2W3	0	chr1:248058888-248059830	olfactory receptor, family 2, subfamily W, member 3	0.817824	0.448622	0.273015	0.914754	0.120369	0.159437	0.0471566	0.287196	0.23876	0.221338	0.003	0.0610075	0.003	0.003	0.11673	1.74035	0.003	0.0396653	0.0568704	0.003	0.69023	3.36654	0.344261
OR2T8	OR2T8	0	chr1:248084319-248085255	olfactory receptor, family 2, subfamily T, member 8	0.439284	0.0349006	0.003	0.0196161	0.003	0.0357091	0.003	0.003	0.109419	0.003	0.0863922	0.003	0.003	0.003	0.0470757	0.003	0.003	0.003	0.003	0.003	0.003	0.279523	0.003
OR2AJ1	OR2AJ1	0	chr1:248097067-248098054	olfactory receptor, family 2, subfamily AJ, member 1	101.634	0.00631163	0.102901	0.220624	1.85746	0.384923	0.003	0.003	0.003	0.003	0.003	0.003	0.003	0.003	0.003	0.003	0.003	0.003	0.003	0.003	0.003	0.0559861	0.003
OR2L8	OR2L8	0	chr1:248112159-248113095	olfactory receptor, family 2, subfamily L, member 8	12.2443	0.003	0.003	0.0196161	0.121315	0.003	0.003	0.003	0.003	0.003	0.003	0.003	0.003	0.003	0.003	0.003	0.003	0.003	0.003	0.003	0.003	0.003	0.003
OR2AK2	OR2AK2	0	chr1:248128678-248129638	olfactory receptor, family 2, subfamily AK, member 2	9.94044	0.0109675	0.0532969	0.152136	0.196032	0.03462	0.003	0.003	0.0211872	0.003	0.003	0.003	0.003	0.003	0.003	0.003	0.003	0.003	0.003	0.003	0.112292	0.003	0.003
OR2L5	OR2L5	0	chr1:248185249-248186185	olfactory receptor, family 2, subfamily L, member 5	156.731	0.003	0.0550528	0.003	1.81972	0.003	0.003	0.003	0.003	0.003	0.003	0.003	0.003	0.003	0.003	0.003	0.003	0.003	0.003	0.003	0.003	0.003	0.003
OR2L2	OR2L2	0	chr1:248201569-248202505	olfactory receptor, family 2, subfamily L, member 2	22.8372	0.0269389	0.003	0.0588484	2.34542	0.0535637	0.003	0.003	0.003	0.0743856	0.003	0.003	0.003	0.003	0.003	0.0797573	0.124895	0.003	0.003	0.003	0.115984	0.003	0.003
OR2L3	OR2L3	0	chr1:248223983-248224919	olfactory receptor, family 2, subfamily L, member 3	32.4802	0.0117412	0.003	0.003	1.51643	0.003	0.003	0.003	0.0218839	0.123976	0.003	0.003	0.003	0.003	0.003	0.003	0.003	0.003	0.003	0.003	0.003	0.003	0.003
OR2L13	OR2L13	0	chr1:248262677-248263613	olfactory receptor, family 2, subfamily L, member 13	1.52475	0.0670892	0.003	0.0392323	0.363944	0.003	0.003	0.003	0.109419	0.57029	0.003	0.20503	0.003	0.003	0.003	0.003	0.003	0.0399914	0.003	0.003	0.003	0.003	0.115697
OR2M5	OR2M5	0	chr1:248308449-248309385	olfactory receptor, family 2, subfamily M, member 5	1	0.003	0.003	0.003	0.003	0.003	0.003	0.003	0.003	0.003	0.003	0.003	0.003	0.003	0.003	0.003	0.003	0.003	0.003	0.003	0.003	0.003	0.003
OR2M2	OR2M2	0	chr1:248343287-248344328	olfactory receptor, family 2, subfamily M, member 2	228.789	0.003	0.240586	0.0172399	2.34639	0.14125	0.003	0.003	0.003	0.003	0.003	0.003	0.003	0.003	0.003	0.003	0.003	0.003	0.003	0.003	0.003	0.003	0.003
OR2M3	OR2M3	0	chr1:248366369-248367305	olfactory receptor, family 2, subfamily M, member 3	351.097	0.003	0.220211	0.0392323	3.57878	0.374946	0.003	0.003	0.003	0.003	0.003	0.003	0.003	0.003	0.003	0.003	0.003	0.003	0.003	0.003	0.003	0.003	0.003
OR2M4	OR2M4	0	chr1:248402230-248403163	olfactory receptor, family 2, subfamily M, member 4	162.895	0.003	0.276402	0.0984685	1.40062	0.179251	0.003	0.003	0.003	0.003	0.003	0.003	0.003	0.003	0.003	0.003	0.003	0.003	0.003	0.003	0.003	0.003	0.003
OR2T33	OR2T33	0	chr1:248436156-248437116	olfactory receptor, family 2, subfamily T, member 33	4.11455	0.0205419	0.003	0.038034	0.294048	0.003	0.003	0.003	0.003	0.003	0.003	0.0595509	0.003	0.003	0.003	0.003	0.003	0.003	0.003	0.003	0.0561459	0.173973	0.003
OR2T12	OR2T12	0	chr1:248457920-248458880	olfactory receptor, family 2, subfamily T, member 12	111.536	0.003	0.003	0.019017	1.31341	0.003	0.003	0.003	0.003	0.003	0.003	0.003	0.003	0.003	0.003	0.003	0.003	0.003	0.003	0.003	0.003	0.003	0.003
OR2M7	OR2M7	0	chr1:248486934-248487870	olfactory receptor, family 2, subfamily M, member 7	2.43492	0.003	0.003	0.003	0.0202191	0.003	0.003	0.003	0.003	0.003	0.003	0.003	0.003	0.003	0.003	0.003	0.003	0.003	0.003	0.003	0.003	0.003	0.003
OR14C36	OR14C36	0	chr1:248512076-248513012	olfactory receptor, family 14, subfamily C, member 36	20.522	0.003	0.003	0.003	0.22241	0.0178546	0.003	0.003	0.003	0.003	0.003	0.003	0.003	0.003	0.003	0.003	0.003	0.003	0.003	0.003	0.003	0.003	0.003
OR2T4	OR2T4	0	chr1:248524936-248525926	olfactory receptor, family 2, subfamily T, member 4	6.32563	0.0155558	0.0512534	0.0183177	0.32103	0.003	0.003	0.003	0.003	0.0923488	0.003	0.114544	0.003	0.003	0.003	0.003	0.003	0.003	0.003	0.003	0.003	0.003	0.003
OR2T6	OR2T6	0	chr1:248550909-248551833	olfactory receptor, family 2, subfamily T, member 6	22.3533	0.003	0.003	0.003	0.22596	0.0362798	0.003	0.003	0.003	0.003	0.003	0.003	0.003	0.003	0.003	0.003	0.003	0.003	0.003	0.003	0.003	0.003	0.003
OR2T1	OR2T1	0	chr1:248569448-248570402	olfactory receptor, family 2, subfamily T, member 1	53.4263	0.003	0.003	0.003	0.632116	0.003	0.003	0.003	0.003	0.003	0.003	0.003	0.003	0.003	0.003	0.003	0.003	0.003	0.003	0.003	0.003	0.003	0.003
OR2T7	OR2T7	0	chr1:248604507-248605431	olfactory receptor, family 2, subfamily T, member 7	19.58	0.003	0.003	0.003	0.22596	0.003	0.003	0.003	0.003	0.003	0.003	0.003	0.003	0.003	0.003	0.003	0.003	0.003	0.003	0.003	0.003	0.003	0.003
OR2T2	OR2T2	0	chr1:248616098-248617070	olfactory receptor, family 2, subfamily T, member 2	130.35	0.003	0.003	0.018731	1.52542	0.01705	0.003	0.003	0.003	0.003	0.003	0.003	0.003	0.003	0.003	0.003	0.003	0.003	0.003	0.003	0.003	0.003	0.003
OR2T3	OR2T3	0	chr1:248636651-248637605	olfactory receptor, family 2, subfamily T, member 3	3.74307	0.003	0.003	0.0191633	0.0197536	0.003	0.003	0.003	0.003	0.003	0.003	0.003	0.003	0.003	0.003	0.003	0.003	0.003	0.003	0.003	0.003	0.003	0.003
OR2T5	OR2T5	0	chr1:248651907-248652834	olfactory receptor, family 2, subfamily T, member 5	8.8257	0.003	0.003	0.003	0.0818407	0.0180677	0.003	0.003	0.003	0.003	0.003	0.003	0.003	0.003	0.003	0.003	0.003	0.003	0.003	0.003	0.003	0.003	0.003
OR2G6	OR2G6	0	chr1:248684947-248685895	olfactory receptor, family 2, subfamily G, member 6	336.568	0.003	0.92073	0.173807	2.32905	0.615233	0.003	0.003	0.003	0.003	0.003	0.003	0.003	0.003	0.003	0.003	0.003	0.003	0.003	0.003	0.003	0.003	0.003
OR2T29	OR2T29	0	chr1:248721847-248722774	olfactory receptor, family 2, subfamily T, member 29	1	0.003	0.003	0.003	0.003	0.003	0.003	0.003	0.003	0.003	0.003	0.003	0.003	0.003	0.003	0.003	0.003	0.003	0.003	0.003	0.003	0.003	0.003
OR2T34	OR2T34	0	chr1:248737104-248738058	olfactory receptor, family 2, subfamily T, member 34	0.303965	0.00986956	0.003	0.003	0.003	0.003	0.003	0.003	0.003	0.003	0.003	0.003	0.003	0.003	0.003	0.003	0.003	0.003	0.003	0.003	0.003	0.003	0.112913
OR2T10	OR2T10	0	chr1:248756133-248757069	olfactory receptor, family 2, subfamily T, member 10	22.6469	0.0206629	0.0550528	0.0196161	1.77928	0.0178546	0.003	0.003	0.003	0.003	0.003	0.003	0.003	0.230799	0.003	0.003	0.0208158	0.0399914	0.003	0.003	0.003	0.003	0.003
OR2T11	OR2T11	0	chr1:248789481-248790429	olfactory receptor, family 2, subfamily T, member 11	4.5567	0.022107	0.003	0.0386239	0.358315	0.003	0.003	0.003	0.003	0.0487883	0.003	0.003	0.003	0.003	0.003	0.003	0.003	0.003	0.003	0.003	0.133126	0.003	0.132797
OR2T35	OR2T35	0	chr1:248801590-248802559	olfactory receptor, family 2, subfamily T, member 35	0.755971	0.00396841	0.003	0.003	0.003	0.003	0.003	0.003	0.003	0.003	0.003	0.003	0.003	0.003	0.003	0.003	0.003	0.003	0.003	0.003	0.0184945	0.003	0.003
OR2T27	OR2T27	0	chr1:248813234-248814185	olfactory receptor, family 2, subfamily T, member 27	8.71302	0.003	0.003	0.0192374	0.0793188	0.003	0.003	0.003	0.003	0.003	0.003	0.003	0.003	0.003	0.003	0.003	0.003	0.003	0.003	0.003	0.003	0.003	0.003
OR14I1	OR14I1	0	chr1:248844672-248845605	olfactory receptor, family 14, subfamily I, member 1	0.652848	0.0189928	0.003	0.003	0.0405977	0.003	0.003	0.003	0.003	0.19918	0.003	0.003	0.003	0.003	0.003	0.003	0.0627052	0.003	0.003	0.003	0.003	0.003	0.003
OR4F29	OR4F29	0	chr1:367658-368594	olfactory receptor, family 4, subfamily F, member 29	1.09041	0.00346591	0.00611698	0.003	0.003	0.003	0.0241104	0.003	0.00486309	0.003	0.003	0.003	0.003	0.003	0.003	0.003	0.003	0.003	0.003	0.003	0.00859141	0.003	0.003
OR4F16	OR4F16	0	chr1:621098-622034	olfactory receptor, family 4, subfamily F, member 16	1.09041	0.00346591	0.00611698	0.003	0.003	0.003	0.0241104	0.003	0.00486309	0.003	0.003	0.003	0.003	0.003	0.003	0.003	0.003	0.003	0.003	0.003	0.00859141	0.003	0.003
OR4F5	OR4F5	0	chr1:69090-70005	olfactory receptor, family 4, subfamily F, member 5	1	0.003	0.003	0.003	0.003	0.003	0.003	0.003	0.003	0.003	0.003	0.003	0.003	0.003	0.003	0.003	0.003	0.003	0.003	0.003	0.003	0.003	0.003
OR13A1	OR13A1	0	chr10:45798886-45799813	olfactory receptor, family 13, subfamily A, member 1	9.65615	0.101403	1.56076	0.932981	1.04347	0.379422	0.209158	0.0225516	0.864127	0.100419	0.003	0.003	0.0428153	0.003	0.003	0.003	0.252908	0.003	0.30962	0.003	0.003	0.003	0.003
OR6X1	OR6X1	0	chr11:123624290-123625226	olfactory receptor, family 6, subfamily X, member 1	0.687726	0.0043622	0.003	0.003	0.003	0.003	0.003	0.003	0.003	0.0247952	0.003	0.003	0.003	0.003	0.003	0.003	0.003	0.003	0.003	0.003	0.003	0.003	0.003
OR6M1	OR6M1	0	chr11:123676118-123677057	olfactory receptor, family 6, subfamily M, member 1	6.69718	0.003	0.054827	0.0195392	0.003	0.003	0.003	0.003	0.003	0.003	0.003	0.003	0.003	0.003	0.003	0.003	0.003	0.003	0.003	0.003	0.003	0.003	0.003
OR8D4	OR8D4	0	chr11:123777138-123778080	olfactory receptor, family 8, subfamily D, member 4	47.1605	0.003	0.109206	0.194629	0.120369	0.141722	0.003	0.003	0.003	0.003	0.003	0.003	0.003	0.003	0.003	0.003	0.003	0.003	0.003	0.003	0.003	0.003	0.003
OR4D5	OR4D5	0	chr11:123810323-123811277	olfactory receptor, family 4, subfamily D, member 5	23.3533	0.003	0.003	0.003	0.256797	0.017443	0.003	0.003	0.003	0.003	0.003	0.003	0.003	0.003	0.003	0.003	0.003	0.003	0.003	0.003	0.003	0.003	0.003
OR6T1	OR6T1	0	chr11:123813576-123814545	olfactory receptor, family 6, subfamily T, member 1	8.82574	0.003	0.003	0.003	0.0969089	0.003	0.003	0.003	0.003	0.003	0.003	0.003	0.003	0.003	0.003	0.003	0.003	0.003	0.003	0.003	0.003	0.003	0.003
OR10S1	OR10S1	0	chr11:123847405-123848365	olfactory receptor, family 10, subfamily S, member 1	6.79994	0.0102564	0.106594	0.0570511	0.0980159	0.01731	0.003	0.003	0.003	0.003	0.003	0.119102	0.003	0.003	0.003	0.003	0.003	0.003	0.003	0.003	0.003	0.003	0.003
OR10G6	OR10G6	0	chr11:123864872-123865868	olfactory receptor, family 10, subfamily G, member 6	2.92977	0.00396731	0.003	0.003	0.0374932	0.003	0.003	0.003	0.003	0.003	0.003	0.003	0.003	0.003	0.003	0.003	0.003	0.0184769	0.003	0.003	0.003	0.003	0.003
OR10G4	OR10G4	0	chr11:123886281-123887214	olfactory receptor, family 10, subfamily G, member 4	96.2577	0.00402565	0.003	0.177243	1.13673	0.233026	0.003	0.003	0.003	0.003	0.003	0.003	0.003	0.003	0.003	0.003	0.003	0.003	0.003	0.003	0.0194104	0.003	0.003
OR10G9	OR10G9	0	chr11:123893719-123894652	olfactory receptor, family 10, subfamily G, member 9	23.9087	0.003	0.0552805	0.15755	0.0202988	0.0537752	0.003	0.003	0.003	0.003	0.003	0.003	0.003	0.003	0.003	0.003	0.003	0.003	0.003	0.003	0.003	0.003	0.003
OR10G8	OR10G8	0	chr11:123900329-123901262	olfactory receptor, family 10, subfamily G, member 8	22.6934	0.003	0.110561	0.118162	0.0405977	0.003	0.003	0.003	0.003	0.003	0.003	0.003	0.003	0.003	0.003	0.003	0.003	0.003	0.003	0.003	0.003	0.003	0.003
OR10G7	OR10G7	0	chr11:123908775-123909708	olfactory receptor, family 10, subfamily G, member 7	83.6447	0.00436859	0.0552805	0.945298	0.263885	0.197176	0.003	0.003	0.003	0.0248975	0.003	0.003	0.003	0.003	0.003	0.003	0.003	0.003	0.003	0.003	0.003	0.003	0.003
OR10D3	OR10D3	0	chr11:124055976-124056912	olfactory receptor, family 10, subfamily D, member 3 (non-functional)	54.0379	0.00522883	0.220211	0.353091	0.181972	0.374946	0.003	0.003	0.003	0.003	0.003	0.003	0.003	0.003	0.003	0.003	0.003	0.003	0.003	0.003	0.0386613	0.003	0.003
OR8G1	OR8G1	0	chr11:124120422-124121334	olfactory receptor, family 8, subfamily G, member 1	13.4497	0.00531099	0.0569284	0.222797	0.003	0.003	0.003	0.003	0.003	0.003	0.003	0.003	0.003	0.003	0.003	0.003	0.003	0.003	0.003	0.003	0.0399758	0.003	0.003
OR8G5	OR8G5	0	chr11:124134827-124135760	olfactory receptor, family 8, subfamily G, member 5	31.7864	0.0419202	1.93482	2.59957	0.365379	0.430201	0.003	0.003	0.0439484	0.003	0.003	0.003	0.0636928	0.003	0.003	0.003	0.003	0.003	0.003	0.003	0.524082	0.003	0.003
OR8D1	OR8D1	0	chr11:124179738-124180662	olfactory receptor, family 8, subfamily D, member 1	79.9616	0.0391119	1.39937	5.87938	2.07472	3.15634	0.003	0.003	0.003	0.003	0.131754	0.003	0.003	0.003	0.003	0.003	0.003	0.003	0.003	0.003	0.452037	0.003	0.003
OR8D2	OR8D2	0	chr11:124189160-124190093	olfactory receptor, family 8, subfamily D, member 2	0.391384	0.00766511	0.003	0.003	0.003	0.003	0.003	0.003	0.003	0.003	0.003	0.003	0.003	0.003	0.003	0.003	0.003	0.003	0.003	0.003	0.0776418	0.003	0.003
OR8B2	OR8B2	0	chr11:124252300-124253239	olfactory receptor, family 8, subfamily B, member 2	44.719	0.00521894	0.109654	0.527558	0.1007	0.195631	0.003	0.003	0.003	0.003	0.003	0.003	0.003	0.003	0.003	0.003	0.003	0.003	0.003	0.003	0.0385031	0.003	0.003
OR8B3	OR8B3	0	chr11:124266308-124267247	olfactory receptor, family 8, subfamily B, member 3	265.226	0.003	0.274135	1.0942	1.06742	0.746955	0.003	0.003	0.003	0.003	0.003	0.003	0.003	0.003	0.003	0.003	0.003	0.003	0.003	0.003	0.003	0.003	0.003
OR8B4	OR8B4	0	chr11:124293840-124294767	olfactory receptor, family 8, subfamily B, member 4	8.51695	0.00595059	0.003	0.178656	0.003	0.0180677	0.003	0.003	0.003	0.0502095	0.003	0.003	0.003	0.003	0.003	0.003	0.003	0.003	0.003	0.003	0.003	0.003	0.003
OR8B8	OR8B8	0	chr11:124310048-124310981	olfactory receptor, family 8, subfamily B, member 8	92.1694	0.00693266	0.663365	1.59519	0.243586	0.0537752	0.003	0.003	0.0659226	0.003	0.003	0.003	0.003	0.003	0.003	0.003	0.003	0.003	0.003	0.003	0.003	0.003	0.003
OR8B12	OR8B12	0	chr11:124412620-124413550	olfactory receptor, family 8, subfamily B, member 12	3.60651	0.0137761	0.05551	0.0790875	0.0611376	0.003	0.003	0.003	0.003	0.003	0.003	0.003	0.003	0.003	0.003	0.003	0.003	0.003	0.003	0.003	0.175418	0.003	0.003
OR8A1	OR8A1	0	chr11:124440015-124440942	olfactory receptor, family 8, subfamily A, member 1	19.1274	0.0223845	0.334449	1.19104	0.184142	0.003	0.003	0.003	0.003	0.003	0.003	0.003	0.003	0.003	0.003	0.003	0.003	0.003	0.003	0.003	0.313152	0.003	0.003
OR52B4	OR52B4	0	chr11:4388583-4389525	olfactory receptor, family 52, subfamily B, member 4	1	0.003	0.003	0.003	0.003	0.003	0.003	0.003	0.003	0.003	0.003	0.003	0.003	0.003	0.003	0.003	0.003	0.003	0.003	0.003	0.003	0.003	0.003
OR52K2	OR52K2	0	chr11:4470569-4471511	olfactory receptor, family 52, subfamily K, member 2	1.33968	0.00894348	0.003	0.0389257	0.003	0.003	0.003	0.003	0.003	0.0245931	0.003	0.003	0.003	0.003	0.003	0.003	0.003	0.003	0.003	0.003	0.003	0.003	0.0765025
OR52K1	OR52K1	0	chr11:4510130-4511072	olfactory receptor, family 52, subfamily K, member 1	346.225	0.00412321	1.14666	3.98988	0.361108	0.212583	0.003	0.003	0.003	0.003	0.003	0.003	0.0209713	0.003	0.003	0.003	0.003	0.003	0.003	0.003	0.003	0.003	0.003
OR52M1	OR52M1	0	chr11:4566420-4567371	olfactory receptor, family 52, subfamily M, member 1	3.56231	0.003	0.003	0.0192374	0.003	0.0175103	0.003	0.003	0.003	0.003	0.003	0.003	0.003	0.003	0.003	0.003	0.003	0.003	0.003	0.003	0.003	0.003	0.003
OR52I2	OR52I2	0	chr11:4608147-4609092	olfactory receptor, family 52, subfamily I, member 2	10.6097	0.0140408	0.108762	0.329581	0.139886	0.0176464	0.003	0.003	0.003	0.0489864	0.003	0.003	0.003	0.003	0.003	0.003	0.003	0.003	0.003	0.003	0.133666	0.003	0.003
OR52I1	OR52I1	0	chr11:4615295-4616240	olfactory receptor, family 52, subfamily I, member 1	25.5154	0.0133093	0.435047	0.407129	0.339722	0.176464	0.003	0.003	0.0216173	0.003	0.003	0.003	0.003	0.003	0.003	0.003	0.003	0.003	0.0377597	0.003	0.114571	0.003	0.003
OR51D1	OR51D1	0	chr11:4661020-4661992	olfactory receptor, family 51, subfamily D, member 1	55.3831	0.003	0.0524602	0.299696	0.193091	0.11935	0.003	0.003	0.003	0.003	0.003	0.003	0.003	0.003	0.003	0.003	0.003	0.003	0.003	0.003	0.003	0.003	0.003
OR51E1	OR51E1	0	chr11:4673756-4674710	olfactory receptor, family 51, subfamily E, member 1	3.51776	0.367883	0.0537253	1.89717	1.77783	1.44777	0.35871	0.891238	0.427144	0.0967939	1.22254	0.0800382	0.969837	0.368581	0.0689141	0.003	0.264093	0.156116	0.783411	0.18802	0.20752	0.155884	0.003
OR51E2	OR51E2	0	chr11:4702981-4703941	olfactory receptor, family 51, subfamily E, member 2	2.6634	0.788408	0.213187	4.18375	2.54841	1.45404	0.201221	0.150952	0.127123	0.0240059	0.209105	1.76668	0.0818824	0.182824	0.003	0.154437	0.665054	0.154873	8.64146	0.261133	0.131007	0.0579911	0.003
OR51F1	OR51F1	0	chr11:4790211-4791147	olfactory receptor, family 51, subfamily F, member 1	5.45428	0.003	0.003	0.0392323	0.0202191	0.003	0.003	0.003	0.003	0.003	0.003	0.003	0.003	0.003	0.003	0.003	0.003	0.003	0.003	0.003	0.003	0.003	0.003
OR4B1	OR4B1	0	chr11:48238361-48239288	olfactory receptor, family 4, subfamily B, member 1	5.39512	0.003	0.0557415	0.003	0.003	0.003	0.003	0.003	0.003	0.003	0.003	0.003	0.003	0.003	0.003	0.003	0.003	0.003	0.003	0.003	0.003	0.003	0.003
OR52R1	OR52R1	0	chr11:4824665-4825610	olfactory receptor, family 52, subfamily R, member 1	15.4554	0.003	0.0543809	0.0581613	0.0199837	0.0529392	0.077695	0.003	0.003	0.003	0.003	0.003	0.003	0.003	0.003	0.003	0.003	0.003	0.003	0.003	0.003	0.003	0.003
OR4X2	OR4X2	0	chr11:48266655-48267564	olfactory receptor, family 4, subfamily X, member 2	1	0.003	0.003	0.003	0.003	0.003	0.003	0.003	0.003	0.003	0.003	0.003	0.003	0.003	0.003	0.003	0.003	0.003	0.003	0.003	0.003	0.003	0.003
OR4X1	OR4X1	0	chr11:48285412-48286327	olfactory receptor, family 4, subfamily X, member 1	1	0.003	0.003	0.003	0.003	0.003	0.003	0.003	0.003	0.003	0.003	0.003	0.003	0.003	0.003	0.003	0.003	0.003	0.003	0.003	0.003	0.003	0.003
OR4S1	OR4S1	0	chr11:48327774-48328701	olfactory receptor, family 4, subfamily S, member 1	2.25564	0.003	0.003	0.003	0.003	0.0180677	0.003	0.003	0.003	0.003	0.003	0.003	0.003	0.003	0.003	0.003	0.003	0.003	0.003	0.003	0.003	0.003	0.003
OR4C3	OR4C3	0	chr11:48346573-48347479	olfactory receptor, family 4, subfamily C, member 3	1	0.003	0.003	0.003	0.003	0.003	0.003	0.003	0.003	0.003	0.003	0.003	0.003	0.003	0.003	0.003	0.003	0.003	0.003	0.003	0.003	0.003	0.003
OR4C5	OR4C5	0	chr11:48387039-48388017	olfactory receptor, family 4, subfamily C, member 5	1	0.003	0.003	0.003	0.003	0.003	0.003	0.003	0.003	0.003	0.003	0.003	0.003	0.003	0.003	0.003	0.003	0.003	0.003	0.003	0.003	0.003	0.003
OR51F2	OR51F2	0	chr11:4842651-4843641	olfactory receptor, family 51, subfamily F, member 2	61.3785	0.003	0.102507	0.512895	0.0377682	0.0833715	0.003	0.003	0.003	0.003	0.003	0.003	0.003	0.003	0.003	0.003	0.003	0.003	0.003	0.003	0.003	0.003	0.003
OR4A47	OR4A47	0	chr11:48510344-48511271	olfactory receptor, family 4, subfamily A, member 47	10.9801	0.003	0.003	0.003	0.122761	0.003	0.003	0.003	0.003	0.003	0.003	0.003	0.003	0.003	0.003	0.003	0.003	0.003	0.003	0.003	0.003	0.003	0.003
OR51S1	OR51S1	0	chr11:4869469-4870393	olfactory receptor, family 51, subfamily S, member 1	23.2348	0.003	0.0559749	0.199301	0.0205418	0.003	0.003	0.003	0.003	0.003	0.003	0.003	0.003	0.003	0.003	0.003	0.003	0.003	0.003	0.003	0.003	0.003	0.003
OR51T1	OR51T1	0	chr11:4903129-4904110	olfactory receptor, family 51, subfamily T, member 1	11.4476	0.003	0.003	0.0740881	0.0572827	0.003	0.003	0.003	0.003	0.003	0.003	0.003	0.003	0.003	0.003	0.003	0.003	0.003	0.003	0.003	0.003	0.003	0.003
OR51A7	OR51A7	0	chr11:4928599-4929535	olfactory receptor, family 51, subfamily A, member 7	21.7388	0.00838089	0.0550528	0.51002	0.003	0.160691	0.103828	0.0890943	0.003	0.003	0.003	0.003	0.003	0.003	0.003	0.003	0.003	0.003	0.003	0.003	0.003	0.003	0.003
OR51G2	OR51G2	0	chr11:4935951-4936893	olfactory receptor, family 51, subfamily G, member 2	107.625	0.003	0.218412	0.603348	0.381169	0.0885762	0.003	0.003	0.003	0.003	0.003	0.003	0.003	0.003	0.003	0.003	0.003	0.003	0.003	0.003	0.003	0.003	0.003
OR51G1	OR51G1	0	chr11:4944606-4945569	olfactory receptor, family 51, subfamily G, member 1	7.80524	0.00514264	0.003	0.151558	0.003	0.003	0.003	0.003	0.003	0.003	0.003	0.003	0.003	0.003	0.003	0.003	0.003	0.003	0.003	0.003	0.0372822	0.003	0.003
OR51A4	OR51A4	0	chr11:4967391-4968330	olfactory receptor, family 51, subfamily A, member 4	126.027	0.003	0.003	1.4459	0.06042	0.003	0.003	0.003	0.003	0.003	0.003	0.003	0.003	0.003	0.003	0.003	0.003	0.003	0.003	0.003	0.003	0.003	0.003
OR51A2	OR51A2	0	chr11:4976004-4976943	olfactory receptor, family 51, subfamily A, member 2	17.0327	0.003	0.003	0.195392	0.003	0.003	0.003	0.003	0.003	0.003	0.003	0.003	0.003	0.003	0.003	0.003	0.003	0.003	0.003	0.003	0.003	0.003	0.003
OR4C13	OR4C13	0	chr11:49973974-49974901	olfactory receptor, family 4, subfamily C, member 13	1	0.003	0.003	0.003	0.003	0.003	0.003	0.003	0.003	0.003	0.003	0.003	0.003	0.003	0.003	0.003	0.003	0.003	0.003	0.003	0.003	0.003	0.003
OR4C12	OR4C12	0	chr11:50003110-50004037	olfactory receptor, family 4, subfamily C, member 12	1	0.003	0.003	0.003	0.003	0.003	0.003	0.003	0.003	0.003	0.003	0.003	0.003	0.003	0.003	0.003	0.003	0.003	0.003	0.003	0.003	0.003	0.003
OR51L1	OR51L1	0	chr11:5020212-5021157	olfactory receptor, family 51, subfamily L, member 1	141.057	0.003	0.0543809	0.930581	0.619493	0.088232	0.003	0.003	0.003	0.003	0.003	0.003	0.003	0.003	0.003	0.003	0.003	0.003	0.003	0.003	0.003	0.003	0.003
OR52J3	OR52J3	0	chr11:5067755-5068688	olfactory receptor, family 52, subfamily J, member 3	8.75613	0.003	0.003	0.0787748	0.0202988	0.003	0.003	0.003	0.003	0.003	0.003	0.003	0.003	0.003	0.003	0.003	0.003	0.003	0.003	0.003	0.003	0.003	0.003
OR52E2	OR52E2	0	chr11:5079882-5080857	olfactory receptor, family 52, subfamily E, member 2	3.65814	0.003	0.003	0.0186608	0.0192369	0.003	0.003	0.003	0.003	0.003	0.003	0.003	0.003	0.003	0.003	0.003	0.003	0.003	0.003	0.003	0.003	0.003	0.003
OR4A5	OR4A5	0	chr11:51411450-51412395	olfactory receptor, family 4, subfamily A, member 5	1	0.003	0.003	0.003	0.003	0.003	0.003	0.003	0.003	0.003	0.003	0.003	0.003	0.003	0.003	0.003	0.003	0.003	0.003	0.003	0.003	0.003	0.003
OR52A4	OR52A4	0	chr11:5141896-5142808	olfactory receptor, family 52, subfamily A, member 4	2.43785	0.003	0.003	0.0202542	0.003	0.003	0.003	0.003	0.003	0.003	0.003	0.003	0.003	0.003	0.003	0.003	0.003	0.003	0.003	0.003	0.003	0.003	0.003
OR4C46	OR4C46	0	chr11:51515281-51516208	olfactory receptor, family 4, subfamily C, member 46	1	0.003	0.003	0.003	0.003	0.003	0.003	0.003	0.003	0.003	0.003	0.003	0.003	0.003	0.003	0.003	0.003	0.003	0.003	0.003	0.003	0.003	0.003
OR52A5	OR52A5	0	chr11:5152924-5153872	olfactory receptor, family 52, subfamily A, member 5	60.9159	0.00841343	0.162482	1.52564	0.238877	0.123047	0.003	0.0438266	0.003	0.0487883	0.003	0.003	0.003	0.003	0.003	0.003	0.003	0.003	0.003	0.003	0.003	0.003	0.003
OR52A1	OR52A1	0	chr11:5172663-5173599	olfactory receptor, family 52, subfamily A, member 1	195.727	0.003	0.165158	1.74584	0.384163	0.0535637	0.003	0.003	0.003	0.003	0.003	0.003	0.003	0.003	0.003	0.003	0.003	0.003	0.003	0.003	0.003	0.003	0.003
OR51V1	OR51V1	0	chr11:5220967-5221912	olfactory receptor, family 51, subfamily V, member 1	39.1277	0.003	0.003	0.348968	0.0999183	0.0176464	0.003	0.003	0.003	0.003	0.003	0.003	0.003	0.003	0.003	0.003	0.003	0.003	0.003	0.003	0.003	0.003	0.003
OR51B4	OR51B4	0	chr11:5322246-5323176	olfactory receptor, family 51, subfamily B, member 4	1.49856	0.0175947	0.003	0.0790875	0.0203792	0.003	0.003	0.0224582	0.0661958	0.003	0.003	0.003	0.003	0.003	0.003	0.003	0.003	0.0604843	0.003	0.003	0.0389818	0.0603943	0.003
OR51B2	OR51B2	0	chr11:5344591-5345527	olfactory receptor, family 51, subfamily B, member 2	7.65407	0.0210801	0.0550528	0.451171	0.121315	0.0178546	0.003	0.003	0.003	0.003	0.003	0.003	0.003	0.003	0.003	0.003	0.003	0.159966	0.003	0.003	0.135315	0.003	0.003
OR51B5	OR51B5	0	chr11:5363818-5364754	olfactory receptor, family 51, subfamily B, member 5	2.62454	0.0355987	0.0550528	0.25501	0.0606573	0.003	0.003	0.003	0.003	0.003	0.003	0.102515	0.003	0.003	0.003	0.003	0.003	0.219953	0.133788	0.003	0.0773227	0.003	0.003
OR51B6	OR51B6	0	chr11:5372737-5373673	olfactory receptor, family 51, subfamily B, member 6	2.38467	0.003	0.003	0.0196161	0.003	0.003	0.003	0.003	0.003	0.003	0.003	0.003	0.003	0.003	0.003	0.003	0.003	0.003	0.003	0.003	0.003	0.003	0.003
OR51M1	OR51M1	0	chr11:5410661-5411606	olfactory receptor, family 51, subfamily M, member 1	27.3563	0.00642922	0.003	0.310194	0.319739	0.0705856	0.003	0.003	0.003	0.003	0.003	0.003	0.0417723	0.003	0.003	0.003	0.003	0.003	0.003	0.003	0.0190952	0.003	0.003
OR51J1	OR51J1	0	chr11:5423826-5424774	olfactory receptor, family 51, subfamily J, member 1 (gene/pseudogene)	0.764497	0.00945275	0.003	0.003	0.0199064	0.003	0.153224	0.003	0.003	0.003	0.106244	0.003	0.003	0.003	0.003	0.003	0.003	0.003	0.003	0.003	0.003	0.003	0.003
OR51Q1	OR51Q1	0	chr11:5443430-5444381	olfactory receptor, family 51, subfamily Q, member 1	3.32191	0.0193616	0.003	0.211611	0.0396594	0.003	0.003	0.003	0.003	0.003	0.003	0.003	0.003	0.003	0.003	0.003	0.003	0.0783722	0.003	0.003	0.189414	0.003	0.003
OR51I1	OR51I1	0	chr11:5461802-5462744	olfactory receptor, family 51, subfamily I, member 1	51.2384	0.0114226	0.273015	1.71273	0.160492	0.194868	0.003	0.003	0.003	0.003	0.003	0.003	0.003	0.0832426	0.003	0.003	0.003	0.003	0.003	0.003	0.0575192	0.003	0.003
OR51I2	OR51I2	0	chr11:5474718-5475654	olfactory receptor, family 51, subfamily I, member 2	3.66248	0.0203752	0.003	0.176545	0.101096	0.0178546	0.003	0.003	0.003	0.003	0.003	0.003	0.0211437	0.12589	0.003	0.003	0.003	0.13997	0.003	0.003	0.003	0.003	0.003
OR52D1	OR52D1	0	chr11:5509936-5510890	olfactory receptor, family 52, subfamily D, member 1	1.87093	0.0382858	0.003	0.11498	0.0987681	0.069772	0.003	0.003	0.0640716	0.003	0.003	0.003	0.003	0.003	0.003	0.0389189	0.003	0.0585434	0.003	0.003	0.415039	0.003	0.003
OR4A16	OR4A16	0	chr11:55110676-55111660	olfactory receptor, family 4, subfamily A, member 16	5.50592	0.003	0.003	0.003	0.057071	0.003	0.003	0.003	0.003	0.003	0.003	0.003	0.003	0.003	0.003	0.003	0.003	0.003	0.003	0.003	0.003	0.003	0.003
OR4A15	OR4A15	0	chr11:55135449-55136391	olfactory receptor, family 4, subfamily A, member 15	7.43717	0.003	0.003	0.003	0.0802461	0.003	0.003	0.003	0.003	0.003	0.003	0.003	0.003	0.003	0.003	0.003	0.003	0.003	0.003	0.003	0.003	0.003	0.003
OR4C15	OR4C15	0	chr11:55321944-55322892	olfactory receptor, family 4, subfamily C, member 15	17.3387	0.003	0.003	0.003	0.199064	0.003	0.003	0.003	0.003	0.003	0.003	0.003	0.003	0.003	0.003	0.003	0.003	0.003	0.003	0.003	0.003	0.003	0.003
OR4C16	OR4C16	0	chr11:55339603-55340533	olfactory receptor, family 4, subfamily C, member 16	1	0.003	0.003	0.003	0.003	0.003	0.003	0.003	0.003	0.003	0.003	0.003	0.003	0.003	0.003	0.003	0.003	0.003	0.003	0.003	0.003	0.003	0.003
OR4C11	OR4C11	0	chr11:55370919-55371849	olfactory receptor, family 4, subfamily C, member 11	1	0.003	0.003	0.003	0.003	0.003	0.003	0.003	0.003	0.003	0.003	0.003	0.003	0.003	0.003	0.003	0.003	0.003	0.003	0.003	0.003	0.003	0.003
OR4P4	OR4P4	0	chr11:55405812-55406769	olfactory receptor, family 4, subfamily P, member 4	2.34082	0.003	0.003	0.0190899	0.003	0.003	0.003	0.003	0.003	0.003	0.003	0.003	0.003	0.003	0.003	0.003	0.003	0.003	0.003	0.003	0.003	0.003	0.003
OR4S2	OR4S2	0	chr11:55418379-55419312	olfactory receptor, family 4, subfamily S, member 2	7.99161	0.003	0.0552805	0.0196937	0.003	0.0179251	0.003	0.003	0.003	0.003	0.003	0.003	0.003	0.003	0.003	0.003	0.003	0.003	0.003	0.003	0.003	0.003	0.003
OR4C6	OR4C6	0	chr11:55432642-55433569	olfactory receptor, family 4, subfamily C, member 6	10.2767	0.003	0.003	0.0992533	0.003	0.0180677	0.003	0.003	0.003	0.003	0.003	0.003	0.003	0.003	0.003	0.003	0.003	0.003	0.003	0.003	0.003	0.003	0.003
OR5D13	OR5D13	0	chr11:55540913-55541855	olfactory receptor, family 5, subfamily D, member 13	23.9673	0.003	0.0546031	0.175166	0.0401231	0.0177152	0.003	0.003	0.003	0.003	0.003	0.003	0.003	0.003	0.003	0.003	0.003	0.003	0.003	0.003	0.003	0.003	0.003
OR5D14	OR5D14	0	chr11:55563031-55563973	olfactory receptor, family 5, subfamily D, member 14	76.2921	0.003	0.003	0.759051	0.100308	0.0531457	0.003	0.003	0.003	0.003	0.003	0.003	0.003	0.003	0.003	0.003	0.003	0.003	0.003	0.003	0.003	0.003	0.003
OR5L1	OR5L1	0	chr11:55578942-55579875	olfactory receptor, family 5, subfamily L, member 1	62.5921	0.003	0.276402	0.216631	0.0608965	0.197176	0.003	0.003	0.003	0.003	0.003	0.003	0.003	0.003	0.003	0.003	0.003	0.003	0.003	0.003	0.003	0.003	0.003
OR5D18	OR5D18	0	chr11:55587105-55588044	olfactory receptor, family 5, subfamily D, member 18	0.573618	0.0124383	0.003	0.0195392	0.003	0.003	0.003	0.003	0.003	0.003	0.003	0.003	0.003	0.003	0.003	0.003	0.003	0.003	0.003	0.003	0.154012	0.003	0.003
OR5L2	OR5L2	0	chr11:55594694-55595627	olfactory receptor, family 5, subfamily L, member 2	38.421	0.003	0.221122	0.216631	0.0202988	0.003	0.003	0.003	0.003	0.003	0.003	0.003	0.003	0.003	0.003	0.003	0.003	0.003	0.003	0.003	0.003	0.003	0.003
OR5D16	OR5D16	0	chr11:55606227-55607211	olfactory receptor, family 5, subfamily D, member 16	12.6643	0.003	0.003	0.129174	0.003	0.0167977	0.003	0.003	0.003	0.003	0.003	0.003	0.003	0.003	0.003	0.003	0.003	0.003	0.003	0.003	0.003	0.003	0.003
OR52H1	OR52H1	0	chr11:5565793-5566735	olfactory receptor, family 52, subfamily H, member 1	5.97155	0.0104134	0.0546031	0.155703	0.003	0.0354305	0.003	0.003	0.0651164	0.003	0.003	0.003	0.003	0.003	0.003	0.003	0.003	0.059498	0.003	0.003	0.003	0.003	0.003
OR5W2	OR5W2	0	chr11:55681128-55682058	olfactory receptor, family 5, subfamily W, member 2	35.2805	0.003	0.22204	0.177947	0.0203792	0.003	0.003	0.003	0.003	0.003	0.003	0.003	0.003	0.003	0.003	0.003	0.003	0.003	0.003	0.003	0.003	0.003	0.003
OR5I1	OR5I1	0	chr11:55702934-55703876	olfactory receptor, family 5, subfamily I, member 1	6.67217	0.003	0.0546031	0.0194629	0.003	0.003	0.003	0.003	0.003	0.003	0.003	0.003	0.003	0.003	0.003	0.003	0.003	0.003	0.003	0.003	0.003	0.003	0.003
OR10AG1	OR10AG1	0	chr11:55735036-55735939	olfactory receptor, family 10, subfamily AG, member 1	21.0544	0.00407787	0.11533	0.0615131	0.147924	0.0186618	0.003	0.003	0.003	0.003	0.003	0.003	0.003	0.003	0.003	0.003	0.003	0.003	0.003	0.003	0.020246	0.003	0.003
OR5F1	OR5F1	0	chr11:55761159-55762101	olfactory receptor, family 5, subfamily F, member 1	2.37191	0.003	0.003	0.0194629	0.003	0.003	0.003	0.003	0.003	0.003	0.003	0.003	0.003	0.003	0.003	0.003	0.003	0.003	0.003	0.003	0.003	0.003	0.003
OR5AS1	OR5AS1	0	chr11:55797894-55798866	olfactory receptor, family 5, subfamily AS, member 1	130.719	0.003	0.10492	0.861625	0.482727	0.11935	0.003	0.003	0.003	0.003	0.003	0.003	0.003	0.003	0.003	0.003	0.003	0.003	0.003	0.003	0.003	0.003	0.003
OR8I2	OR8I2	0	chr11:55860783-55861713	olfactory receptor, family 8, subfamily I, member 2	1	0.003	0.003	0.003	0.003	0.003	0.003	0.003	0.003	0.003	0.003	0.003	0.003	0.003	0.003	0.003	0.003	0.003	0.003	0.003	0.003	0.003	0.003
OR8H2	OR8H2	0	chr11:55872518-55873454	olfactory receptor, family 8, subfamily H, member 2	278.912	0.003	0.003	0.411939	2.62848	0.303528	0.003	0.003	0.003	0.003	0.003	0.003	0.003	0.003	0.003	0.003	0.003	0.003	0.003	0.003	0.003	0.003	0.003
OR8H3	OR8H3	0	chr11:55889848-55890784	olfactory receptor, family 8, subfamily H, member 3	22.6776	0.003	0.0550528	0.0196161	0.161753	0.0357091	0.003	0.003	0.003	0.003	0.003	0.003	0.003	0.003	0.003	0.003	0.003	0.003	0.003	0.003	0.003	0.003	0.003
OR8J3	OR8J3	0	chr11:55904249-55905194	olfactory receptor, family 8, subfamily J, member 3	100.71	0.0124385	0.271905	2.75297	1.43882	0.547038	0.003	0.154016	0.003	0.003	0.003	0.003	0.003	0.003	0.003	0.003	0.003	0.003	0.003	0.003	0.003	0.003	0.003
OR8K5	OR8K5	0	chr11:55926872-55927793	olfactory receptor, family 8, subfamily K, member 5	74.2361	0.003	0.393472	0.280142	0.144369	0.0728507	0.003	0.003	0.003	0.003	0.003	0.003	0.003	0.003	0.003	0.003	0.003	0.003	0.003	0.003	0.003	0.003	0.003
OR5J2	OR5J2	0	chr11:55944093-55945029	olfactory receptor, family 5, subfamily J, member 2	11.6264	0.003	0.0550528	0.0784646	0.003	0.003	0.003	0.003	0.003	0.003	0.003	0.003	0.003	0.003	0.003	0.003	0.003	0.003	0.003	0.003	0.003	0.003	0.003
OR5T2	OR5T2	0	chr11:55999584-56000538	olfactory receptor, family 5, subfamily T, member 2	44.0503	0.003	0.107451	0.383267	0.003	0.034886	0.003	0.003	0.003	0.003	0.003	0.003	0.003	0.003	0.003	0.003	0.003	0.003	0.003	0.003	0.003	0.003	0.003
OR5T3	OR5T3	0	chr11:56019675-56020695	olfactory receptor, family 5, subfamily T, member 3	6.52632	0.003	0.003	0.017668	0.0546478	0.003	0.003	0.003	0.003	0.003	0.003	0.003	0.003	0.003	0.003	0.003	0.003	0.003	0.003	0.003	0.003	0.003	0.003
OR52B6	OR52B6	0	chr11:5602169-5603111	olfactory receptor, family 52, subfamily B, member 6	1.00931	0.0431287	0.003	0.0778514	0.0401231	0.0531457	0.003	0.003	0.217055	0.003	0.003	0.003	0.0838852	0.003	0.003	0.296651	0.003	0.0396653	0.003	0.003	0.003	0.0198032	0.003
OR5T1	OR5T1	0	chr11:56043180-56044092	olfactory receptor, family 5, subfamily T, member 1	238.377	0.003	0.967782	1.07347	0.54275	0.276518	0.003	0.003	0.003	0.003	0.003	0.003	0.003	0.003	0.003	0.003	0.003	0.003	0.003	0.003	0.003	0.003	0.003
OR8H1	OR8H1	0	chr11:56057605-56058538	olfactory receptor, family 8, subfamily H, member 1	41.4493	0.003	0.003	0.0393874	0.365379	0.0896253	0.003	0.003	0.003	0.003	0.003	0.003	0.003	0.003	0.003	0.003	0.003	0.003	0.003	0.003	0.003	0.003	0.003
OR8K3	OR8K3	0	chr11:56085782-56086718	olfactory receptor, family 8, subfamily K, member 3	182.777	0.003	0.38537	0.117697	1.476	0.214255	0.003	0.003	0.003	0.003	0.003	0.003	0.003	0.003	0.003	0.003	0.003	0.003	0.003	0.003	0.003	0.003	0.003
OR8K1	OR8K1	0	chr11:56113514-56114471	olfactory receptor, family 8, subfamily K, member 1	6.96133	0.003	0.003	0.0381798	0.0393562	0.003	0.003	0.003	0.003	0.003	0.003	0.003	0.003	0.003	0.003	0.003	0.003	0.003	0.003	0.003	0.003	0.003	0.003
OR8J1	OR8J1	0	chr11:56127722-56128670	olfactory receptor, family 8, subfamily J, member 1	46.9824	0.003	0.216642	0.308991	0.003	0.0351561	0.003	0.003	0.003	0.003	0.003	0.003	0.003	0.003	0.003	0.003	0.003	0.003	0.003	0.003	0.003	0.003	0.003
OR8U1	OR8U1	0	chr11:56143084-56144026	olfactory receptor, family 8, subfamily U, member 1	82.7657	0.003	0.273015	0.642274	0.0601846	0.0177152	0.003	0.003	0.003	0.003	0.003	0.003	0.003	0.003	0.003	0.003	0.003	0.003	0.003	0.003	0.003	0.003	0.003
OR5R1	OR5R1	0	chr11:56184736-56185708	olfactory receptor, family 5, subfamily R, member 1	30.8943	0.003	0.10492	0.243503	0.0193091	0.003	0.003	0.003	0.003	0.003	0.003	0.003	0.003	0.003	0.003	0.003	0.003	0.003	0.003	0.003	0.003	0.003	0.003
OR5M9	OR5M9	0	chr11:56229947-56230877	olfactory receptor, family 5, subfamily M, member 9	362.4	0.003	0.33306	2.74829	0.835547	0.431907	0.003	0.003	0.003	0.003	0.003	0.003	0.003	0.003	0.003	0.003	0.003	0.003	0.003	0.003	0.003	0.003	0.003
OR5M3	OR5M3	0	chr11:56237052-56237973	olfactory receptor, family 5, subfamily M, member 3	79.9454	0.00651305	0.11242	0.800406	0.659972	0.509955	0.003	0.003	0.003	0.003	0.003	0.003	0.003	0.003	0.003	0.003	0.003	0.003	0.003	0.003	0.0592088	0.003	0.003
OR5M8	OR5M8	0	chr11:56257913-56258846	olfactory receptor, family 5, subfamily M, member 8	19.28	0.003	0.0552805	0.137856	0.0202988	0.0179251	0.003	0.003	0.003	0.003	0.003	0.003	0.003	0.003	0.003	0.003	0.003	0.003	0.003	0.003	0.003	0.003	0.003
OR5M11	OR5M11	0	chr11:56309818-56310733	olfactory receptor, family 5, subfamily M, member 11	2.28	0.003	0.003	0.003	0.003	0.01836	0.003	0.003	0.003	0.003	0.003	0.003	0.003	0.003	0.003	0.003	0.003	0.003	0.003	0.003	0.003	0.003	0.003
OR5M10	OR5M10	0	chr11:56344252-56345197	olfactory receptor, family 5, subfamily M, member 10	69.2934	0.003	0.003	0.620387	0.119902	0.088232	0.003	0.003	0.003	0.003	0.003	0.003	0.003	0.003	0.003	0.003	0.003	0.003	0.003	0.003	0.003	0.003	0.003
OR5M1	OR5M1	0	chr11:56380033-56380978	olfactory receptor, family 5, subfamily M, member 1	43.0815	0.00418764	0.108762	0.484678	0.0399673	0.088232	0.003	0.0220023	0.003	0.003	0.003	0.003	0.003	0.003	0.003	0.003	0.003	0.003	0.003	0.003	0.003	0.003	0.003
OR5AP2	OR5AP2	0	chr11:56408967-56409918	olfactory receptor, family 5, subfamily AP, member 2	19.3476	0.003	0.003	0.134661	0.0594891	0.0350206	0.003	0.003	0.003	0.003	0.003	0.003	0.003	0.003	0.003	0.003	0.003	0.003	0.003	0.003	0.003	0.003	0.003
OR5AR1	OR5AR1	0	chr11:56431161-56432091	olfactory receptor, family 5, subfamily AR, member 1	20.4743	0.003	0.003	0.158175	0.0815168	0.003	0.003	0.003	0.003	0.003	0.003	0.003	0.003	0.003	0.003	0.003	0.003	0.003	0.003	0.003	0.003	0.003	0.003
OR9G1	OR9G1	0	chr11:56467863-56468778	olfactory receptor, family 9, subfamily G, member 1	121.448	0.003	0.453496	0.766544	0.145535	0.0917998	0.003	0.003	0.003	0.003	0.003	0.003	0.003	0.003	0.003	0.003	0.003	0.003	0.003	0.003	0.003	0.003	0.003
OR9G4	OR9G4	0	chr11:56510306-56511242	olfactory receptor, family 9, subfamily G, member 4	1320.82	0.003	3.90875	6.29678	1.69841	3.94586	0.003	0.003	0.003	0.003	0.003	0.003	0.003	0.003	0.003	0.003	0.003	0.003	0.003	0.003	0.003	0.003	0.003
OR5AK2	OR5AK2	0	chr11:56756388-56757315	olfactory receptor, family 5, subfamily AK, member 2	4.05844	0.003	0.003	0.0397013	0.003	0.003	0.003	0.003	0.003	0.003	0.003	0.003	0.003	0.003	0.003	0.003	0.003	0.003	0.003	0.003	0.003	0.003	0.003
OR56B1	OR56B1	0	chr11:5757755-5758718	olfactory receptor, family 56, subfamily B, member 1	8.64792	0.0310727	0.318511	0.359949	0.292932	0.103466	0.0431273	0.003	0.0633098	0.0717322	0.0416553	0.003	0.003	0.1214	0.003	0.0769122	0.003	0.003	0.0921543	0.003	0.003	0.003	0.003
OR52N4	OR52N4	0	chr11:5775970-5776933	olfactory receptor, family 52, subfamily N, member 4	4.4329	0.152802	0.583937	0.568341	0.781153	0.775992	0.183116	0.021479	0.675304	0.0239107	0.0208276	0.003	0.0611684	0.003	0.003	0.365333	0.361319	0.231389	0.258032	0.003	0.149129	0.134776	0.130165
OR6Q1	OR6Q1	0	chr11:57798424-57799375	olfactory receptor, family 6, subfamily Q, member 1	1	0.003	0.003	0.003	0.003	0.003	0.003	0.003	0.003	0.003	0.003	0.003	0.003	0.003	0.003	0.003	0.003	0.003	0.003	0.003	0.003	0.003	0.003
OR9I1	OR9I1	0	chr11:57885974-57886916	olfactory receptor, family 9, subfamily I, member 1	141.94	0.003	0.327618	0.973143	0.2608	0.141722	0.003	0.003	0.003	0.003	0.003	0.003	0.003	0.003	0.003	0.003	0.003	0.003	0.003	0.003	0.003	0.003	0.003
OR9Q1	OR9Q1	0	chr11:57946916-57947846	olfactory receptor, family 9, subfamily Q, member 1	1.34094	0.00547737	0.003	0.003	0.0203792	0.003	0.003	0.003	0.003	0.003	0.003	0.003	0.0426379	0.003	0.003	0.003	0.003	0.003	0.003	0.003	0.003	0.003	0.003
OR9Q2	OR9Q2	0	chr11:57957962-57958904	olfactory receptor, family 9, subfamily Q, member 2	89.9987	0.003	0.0546031	0.54496	0.320984	0.159437	0.003	0.003	0.003	0.003	0.003	0.003	0.003	0.003	0.003	0.003	0.003	0.003	0.003	0.003	0.003	0.003	0.003
OR1S2	OR1S2	0	chr11:57970678-57971614	olfactory receptor, family 1, subfamily S, member 2	1.39702	0.00522883	0.003	0.003	0.0202191	0.003	0.003	0.003	0.003	0.003	0.003	0.003	0.003	0.003	0.003	0.003	0.003	0.003	0.003	0.003	0.0386613	0.003	0.003
OR1S1	OR1S1	0	chr11:57982255-57983191	olfactory receptor, family 1, subfamily S, member 1	24.6313	0.003	0.003	0.117697	0.121315	0.0535637	0.003	0.003	0.003	0.003	0.003	0.003	0.003	0.003	0.003	0.003	0.003	0.003	0.003	0.003	0.003	0.003	0.003
OR52N5	OR52N5	0	chr11:5798892-5799864	olfactory receptor, family 52, subfamily N, member 5	235.018	0.003	0.577063	1.51721	0.521345	0.2046	0.003	0.003	0.003	0.003	0.003	0.003	0.003	0.003	0.003	0.003	0.003	0.003	0.003	0.003	0.003	0.003	0.003
OR10Q1	OR10Q1	0	chr11:57995390-57996347	olfactory receptor, family 10, subfamily Q, member 1	9.62278	0.00845716	0.0535102	0.0381798	0.216459	0.0173763	0.003	0.003	0.003	0.003	0.003	0.003	0.003	0.003	0.003	0.003	0.003	0.003	0.0557344	0.003	0.0375801	0.003	0.003
OR10W1	OR10W1	0	chr11:58034415-58035330	olfactory receptor, family 10, subfamily W, member 1	0.713883	0.00420237	0.003	0.003	0.003	0.003	0.003	0.003	0.003	0.003	0.0222379	0.003	0.003	0.003	0.003	0.003	0.003	0.003	0.003	0.003	0.003	0.003	0.003
OR52N1	OR52N1	0	chr11:5809086-5810046	olfactory receptor, family 52, subfamily N, member 1	71.3186	0.00398221	0.213187	0.51346	0.392064	0.01731	0.003	0.003	0.003	0.003	0.003	0.003	0.003	0.003	0.003	0.003	0.003	0.003	0.003	0.003	0.0187153	0.003	0.003
OR5B17	OR5B17	0	chr11:58125600-58126542	olfactory receptor, family 5, subfamily B, member 17	1	0.003	0.003	0.003	0.003	0.003	0.003	0.003	0.003	0.003	0.003	0.003	0.003	0.003	0.003	0.003	0.003	0.003	0.003	0.003	0.003	0.003	0.003
OR5B3	OR5B3	0	chr11:58169940-58170882	olfactory receptor, family 5, subfamily B, member 3	22.1997	0.003	0.0546031	0.13624	0.0401231	0.0354305	0.003	0.003	0.003	0.003	0.003	0.003	0.003	0.003	0.003	0.003	0.003	0.003	0.003	0.003	0.003	0.003	0.003
OR5B2	OR5B2	0	chr11:58189807-58190734	olfactory receptor, family 5, subfamily B, member 2	30.0857	0.0118333	0.501673	0.655072	0.122761	0.144542	0.003	0.003	0.0664713	0.003	0.003	0.003	0.003	0.003	0.003	0.003	0.003	0.003	0.003	0.003	0.003	0.0808609	0.003
OR5B12	OR5B12	0	chr11:58206682-58207624	olfactory receptor, family 5, subfamily B, member 12	18.3858	0.0111641	0.163809	0.350331	0.200615	0.106291	0.003	0.003	0.003	0.003	0.003	0.003	0.003	0.003	0.003	0.079107	0.003	0.003	0.003	0.003	0.0575192	0.003	0.003
OR5B21	OR5B21	0	chr11:58274651-58275578	olfactory receptor, family 5, subfamily B, member 21	1.40208	0.00525294	0.003	0.003	0.0204602	0.003	0.003	0.003	0.003	0.003	0.003	0.003	0.003	0.003	0.003	0.003	0.003	0.003	0.003	0.003	0.003	0.003	0.0390471
OR52N2	OR52N2	0	chr11:5841565-5842528	olfactory receptor, family 52, subfamily N, member 2	6.02527	0.0306667	0.212341	0.246281	0.0390577	0.24142	0.003	0.003	0.0422065	0.003	0.003	0.003	0.0203895	0.003	0.003	0.153824	0.003	0.003	0.202739	0.003	0.003	0.0385075	0.003
OR52E6	OR52E6	0	chr11:5862188-5863127	olfactory receptor, family 52, subfamily E, member 6	14.6568	0.00642216	0.054827	0.136774	0.06042	0.124492	0.003	0.003	0.003	0.003	0.003	0.003	0.003	0.003	0.003	0.003	0.003	0.003	0.003	0.003	0.0577546	0.003	0.003
OR52E8	OR52E8	0	chr11:5877981-5878920	olfactory receptor, family 52, subfamily E, member 8	9.95372	0.003	0.054827	0.0586176	0.003	0.003	0.003	0.003	0.003	0.003	0.003	0.003	0.003	0.003	0.003	0.003	0.003	0.003	0.003	0.003	0.003	0.003	0.003
OR52E4	OR52E4	0	chr11:5905522-5906458	olfactory receptor, family 52, subfamily E, member 4	140.982	0.003	0.110106	0.823878	0.525697	0.232109	0.003	0.003	0.003	0.003	0.003	0.003	0.003	0.003	0.003	0.003	0.003	0.003	0.003	0.003	0.003	0.003	0.003
OR5AN1	OR5AN1	0	chr11:59131931-59132864	olfactory receptor, family 5, subfamily AN, member 1	880.273	0.003	1.27145	1.22101	4.79053	3.28029	0.003	0.003	0.003	0.003	0.003	0.003	0.003	0.003	0.003	0.003	0.003	0.003	0.003	0.003	0.003	0.003	0.003
OR5A2	OR5A2	0	chr11:59189454-59190426	olfactory receptor, family 5, subfamily A, member 2	2283.16	0.003	4.98372	7.49239	14.308	0.6138	0.003	0.003	0.003	0.003	0.003	0.003	0.003	0.003	0.003	0.003	0.003	0.003	0.003	0.003	0.003	0.003	0.003
OR5A1	OR5A1	0	chr11:59210641-59211586	olfactory receptor, family 5, subfamily A, member 1	718.984	0.003	0.652571	3.50907	3.93678	0.529392	0.003	0.003	0.003	0.003	0.003	0.003	0.003	0.003	0.003	0.003	0.003	0.003	0.003	0.003	0.003	0.003	0.003
OR52E5	OR52E5	0	chr11:5922006-5922987	olfactory receptor, family 52, subfamily E, member 5	138.553	0.003	0.0518498	1.0928	0.248225	0.269761		0.003	0.003	0.003	0.003	0.003	0.003	0.003	0.003	0.003	0.003	0.003	0.003	0.003	0.003	0.003	0.003
OR4D6	OR4D6	0	chr11:59224433-59225375	olfactory receptor, family 4, subfamily D, member 6	1.73788	0.0285297	0.003	0.0194629	0.140431	0.0354305	0.003	0.132552	0.108527	0.003	0.003	0.003	0.0209713	0.003	0.003	0.003	0.003	0.003	0.003	0.003	0.003	0.158425	0.003
OR4D10	OR4D10	0	chr11:59244902-59245835	olfactory receptor, family 4, subfamily D, member 10	175.314	0.00406739	0.331683	0.236324	2.21257	0.0717002	0.003	0.003	0.003	0.003	0.003	0.003	0.003	0.003	0.003	0.003	0.003	0.0200782	0.003	0.003	0.003	0.003	0.003
OR4D11	OR4D11	0	chr11:59271048-59271981	olfactory receptor, family 4, subfamily D, member 11	6.65773	0.00667268	0.0552805	0.003	0.101494	0.0179251	0.003	0.003	0.003	0.003	0.003	0.0617629	0.003	0.003	0.003	0.003	0.003	0.003	0.003	0.003	0.003	0.003	0.003
OR4D9	OR4D9	0	chr11:59282385-59283327	olfactory receptor, family 4, subfamily D, member 9	522.016	0.003	0.0546031	0.155703	6.01846	0.0354305	0.10298	0.003	0.003	0.003	0.003	0.003	0.003	0.003	0.003	0.003	0.003	0.003	0.003	0.003	0.003	0.003	0.003
OR10V1	OR10V1	0	chr11:59480391-59481318	olfactory receptor, family 10, subfamily V, member 1	9.4385	0.00554596	0.003	0.0397013	0.163681	0.003	0.003	0.003	0.003	0.003	0.0437354	0.003	0.003	0.003	0.003	0.003	0.003	0.003	0.003	0.003	0.003	0.003	0.003
OR56A3	OR56A3	0	chr11:5968576-5969521	olfactory receptor, family 56, subfamily A, member 3	46.7605	0.00997319	0.543809	0.949968	0.159869	0.211757	0.003	0.003	0.003	0.003	0.003	0.003	0.003	0.003	0.003	0.003	0.003	0.003	0.003	0.003	0.114571	0.003	0.003
OR56A5	OR56A5	0	chr11:5988785-5989724	olfactory receptor, family 56, subfamily A, member 5	8.74147	0.003	0.003	0.0586176	0.04028	0.003	0.003	0.003	0.003	0.003	0.003	0.003	0.003	0.003	0.003	0.003	0.003	0.003	0.003	0.003	0.003	0.003	0.003
OR52L1	OR52L1	0	chr11:6007173-6008115	olfactory receptor, family 52, subfamily L, member 1	43.7083	0.003	0.003	0.350331	0.100308	0.070861	0.003	0.003	0.003	0.003	0.003	0.003	0.003	0.003	0.003	0.003	0.003	0.003	0.003	0.003	0.003	0.003	0.003
OR56A4	OR56A4	0	chr11:6023283-6024222	olfactory receptor, family 56, subfamily A, member 4	119.13	0.003	0.054827	0.918342	0.1007	0.355693	0.003	0.003	0.003	0.003	0.003	0.003	0.003	0.003	0.003	0.003	0.003	0.003	0.003	0.003	0.003	0.003	0.003
OR56A1	OR56A1	0	chr11:6047980-6048922	olfactory receptor, family 56, subfamily A, member 1	67.2628	0.003	0.003	0.486571	0.140431	0.177152	0.003	0.003	0.003	0.003	0.003	0.003	0.003	0.003	0.003	0.003	0.003	0.003	0.003	0.003	0.003	0.003	0.003
OR56B4	OR56B4	0	chr11:6129008-6129965	olfactory receptor, family 56, subfamily B, member 4	6.59668	0.0189039	0.321061	0.0763596	0.0983906	0.003	0.003	0.003	0.003	0.003	0.10497	0.003	0.003	0.003	0.003	0.003	0.003	0.155492	0.003	0.003	0.003	0.003	0.003
OR52B2	OR52B2	0	chr11:6190587-6191556	olfactory receptor, family 52, subfamily B, member 2	12.9155	0.0125459	0.0526669	0.507645	0.0193818	0.0684571	0.003	0.0852405	0.003	0.003	0.003	0.003	0.003	0.003	0.003	0.003	0.003	0.0573923	0.003	0.003	0.003	0.0191023	0.003
OR52W1	OR52W1	0	chr11:6220453-6221413	olfactory receptor, family 52, subfamily W, member 1	14.3786	0.00751086	0.0532969	0.285255	0.0588096	0.03462	0.003	0.003	0.0211872	0.003	0.003	0.003	0.003	0.0406275	0.003	0.003	0.003	0.0193591	0.003	0.003	0.003	0.003	0.003
OR2AG2	OR2AG2	0	chr11:6789240-6790188	olfactory receptor, family 2, subfamily AG, member 2	22.1965	0.0104922	0.108321	0.0386239	0.696724	0.0878904	0.003	0.003	0.003	0.003	0.003	0.003	0.003	0.003	0.003	0.003	0.122875	0.003	0.003	0.003	0.003	0.003	0.003
OR2AG1	OR2AG1	0	chr11:6806268-6807216	olfactory receptor, family 2, subfamily AG, member 1	27.0696	0.0118435	0.003	0.135184	0.915694	0.228515	0.003	0.003	0.003	0.003	0.003	0.003	0.003	0.144496	0.003	0.003	0.003	0.003	0.003	0.003	0.003	0.003	0.003
OR6A2	OR6A2	0	chr11:6815958-6816939	olfactory receptor, family 6, subfamily A, member 2	3.4686	0.0127772	0.003	0.018522	0.152754	0.003	0.003	0.003	0.003	0.003	0.003	0.003	0.003	0.003	0.003	0.003	0.003	0.003	0.126019	0.003	0.0364162	0.003	0.003
OR10A5	OR10A5	0	chr11:6866913-6867864	olfactory receptor, family 10, subfamily A, member 5	2.40247	0.003	0.003	0.003	0.0198297	0.003	0.003	0.003	0.003	0.003	0.003	0.003	0.003	0.003	0.003	0.003	0.003	0.003	0.003	0.003	0.003	0.003	0.003
OR10A2	OR10A2	0	chr11:6890985-6891894	olfactory receptor, family 10, subfamily A, member 2	5.35265	0.0337434	0.228687	0.142359	0.3144	0.0370193	0.003	0.003	0.136347	0.128738	0.112138	0.003	0.003	0.108938	0.003	0.003	0.003	0.003	0.003	0.003	0.003	0.0207329	0.003
OR10A4	OR10A4	0	chr11:6897851-6898823	olfactory receptor, family 10, subfamily A, member 4	1.18943	0.00976562	0.003	0.037462	0.003	0.003	0.003	0.003	0.003	0.003	0.003	0.003	0.003	0.003	0.003	0.003	0.003	0.0571675	0.003	0.003	0.003	0.0570825	0.003
OR2D2	OR2D2	0	chr11:6912807-6913731	olfactory receptor, family 2, subfamily D, member 2	27.237	0.003	0.167925	0.0199301	0.102709	0.0362798	0.003	0.003	0.003	0.003	0.003	0.003	0.003	0.003	0.003	0.003	0.003	0.003	0.003	0.003	0.003	0.003	0.003
OR2D3	OR2D3	0	chr11:6942280-6943222	olfactory receptor, family 2, subfamily D, member 3	4.89089	0.00412321	0.0546031	0.003	0.0200615	0.003	0.003	0.003	0.003	0.003	0.003	0.003	0.0209713	0.003	0.003	0.003	0.003	0.003	0.003	0.003	0.003	0.003	0.003
OR2AT4	OR2AT4	0	chr11:74799798-74800758	olfactory receptor, family 2, subfamily AT, member 4	273.945	0.00411941	0.159891	2.85255	1.29381	0.20772	0.003	0.003	0.003	0.003	0.0209105	0.003	0.003	0.003	0.003	0.003	0.003	0.003	0.003	0.003	0.003	0.003	0.003
OR5P2	OR5P2	0	chr11:7817523-7818489	olfactory receptor, family 5, subfamily P, member 2	6.48795	0.0128485	0.10575	0.113238	0.0972751	0.017179	0.003	0.003	0.003	0.003	0.145218	0.003	0.003	0.003	0.003	0.003	0.003	0.003	0.0183581	0.003	0.003	0.003	0.003
OR5P3	OR5P3	0	chr11:7846586-7847519	olfactory receptor, family 5, subfamily P, member 3	122.138	0.00416795	0.0552805	1.22101	0.0608965	0.699077	0.003	0.003	0.003	0.003	0.0216872	0.003	0.003	0.003	0.003	0.003	0.003	0.003	0.003	0.003	0.003	0.003	0.003
OR10A6	OR10A6	0	chr11:7949267-7950209	olfactory receptor, family 10, subfamily A, member 6	1692.2	0.0051821	7.91744	18.0031	6.33944	2.81672	0.003	0.003	0.003	0.003	0.003	0.003	0.003	0.003	0.003	0.003	0.003	0.003	0.0379136	0.003	0.003	0.003	0.003
OR10A3	OR10A3	0	chr11:7960125-7961067	olfactory receptor, family 10, subfamily A, member 3	20.2673	0.00950688	0.327618	0.214091	0.140431	0.0885762	0.003	0.003	0.003	0.003	0.10711	0.003	0.003	0.003	0.003	0.003	0.003	0.003	0.003	0.003	0.003	0.003	0.003
OR10AD1	OR10AD1	0	chr12:48596124-48597075	olfactory receptor, family 10, subfamily AD, member 1	1.13262	0.0456368	0.0539421	0.0384747	0.0793188	0.0350206	0.003	0.003	0.278762	0.170071	0.0423263	0.003	0.0207179	0.003	0.003	0.003	0.003	0.019593	0.003	0.003	0.13259	0.0391278	0.003
OR8S1	OR8S1	0	chr12:48919414-48920350	olfactory receptor, family 8, subfamily S, member 1	1.60821	0.00995713	0.0550528	0.003	0.003	0.003	0.003	0.003	0.003	0.003	0.003	0.003	0.003	0.003	0.003	0.003	0.003	0.0399914	0.003	0.003	0.0773227	0.003	0.003
OR9K2	OR9K2	0	chr12:55523618-55524557	olfactory receptor, family 9, subfamily K, member 2	304.1	0.003	0.822405	1.73899	0.785461	0.302339	0.003	0.003	0.003	0.003	0.003	0.003	0.003	0.003	0.003	0.003	0.003	0.003	0.003	0.003	0.003	0.003	0.003
OR10A7	OR10A7	0	chr12:55614808-55615756	olfactory receptor, family 10, subfamily A, member 7	7.03639	0.003	0.003	0.0386239	0.0398128	0.003	0.003	0.003	0.003	0.003	0.003	0.003	0.003	0.003	0.003	0.003	0.003	0.003	0.003	0.003	0.003	0.003	0.003
OR6C74	OR6C74	0	chr12:55641071-55642007	olfactory receptor, family 6, subfamily C, member 74	90.597	0.003	0.165158	0.843494	0.0606573	0.0178546	0.003	0.003	0.003	0.003	0.003	0.003	0.003	0.003	0.003	0.003	0.003	0.003	0.003	0.003	0.003	0.003	0.003
OR6C6	OR6C6	0	chr12:55688074-55689016	olfactory receptor, family 6, subfamily C, member 6	25.4234	0.003	0.109206	0.0778514	0.100308	0.0177152	0.003	0.003	0.003	0.003	0.003	0.003	0.003	0.003	0.003	0.003	0.003	0.003	0.003	0.003	0.003	0.003	0.003
OR6C1	OR6C1	0	chr12:55714383-55715319	olfactory receptor, family 6, subfamily C, member 1	416.199	0.003	1.15611	2.4324	1.33446	0.0714183	0.003	0.003	0.003	0.003	0.003	0.003	0.003	0.003	0.003	0.003	0.003	0.003	0.003	0.003	0.003	0.003	0.003
OR6C3	OR6C3	0	chr12:55725484-55726417	olfactory receptor, family 6, subfamily C, member 3	11.307	0.00887826	0.0552805	0.0590811	0.284184	0.003	0.003	0.003	0.003	0.003	0.003	0.003	0.003	0.003	0.003	0.003	0.003	0.003	0.003	0.003	0.0970522	0.003	0.003
OR6C75	OR6C75	0	chr12:55758894-55759830	olfactory receptor, family 6, subfamily C, member 75	300.119	0.003	0.110106	0.137313	3.33615	0.0178546	0.003	0.003	0.003	0.003	0.003	0.003	0.003	0.003	0.003	0.003	0.003	0.003	0.003	0.003	0.003	0.003	0.003
OR6C65	OR6C65	0	chr12:55794312-55795248	olfactory receptor, family 6, subfamily C, member 65	1	0.003	0.003	0.003	0.003	0.003	0.003	0.003	0.003	0.003	0.003	0.003	0.003	0.003	0.003	0.003	0.003	0.003	0.003	0.003	0.003	0.003	0.003
OR6C76	OR6C76	0	chr12:55820037-55820973	olfactory receptor, family 6, subfamily C, member 76	24.8167	0.006437	0.0550528	0.176545	0.404382	0.003	0.003	0.003	0.003	0.003	0.003	0.003	0.003	0.003	0.003	0.003	0.003	0.003	0.003	0.003	0.057992	0.003	0.003
OR6C2	OR6C2	0	chr12:55845997-55846933	olfactory receptor, family 6, subfamily C, member 2	92.201	0.00686214	1.10106	0.470787	0.566135	0.392801	0.003	0.003	0.003	0.003	0.0647942	0.003	0.003	0.003	0.003	0.003	0.003	0.003	0.003	0.003	0.003	0.003	0.003
OR6C70	OR6C70	0	chr12:55862986-55863922	olfactory receptor, family 6, subfamily C, member 70	82.3615	0.003	0.495475	0.333474	0.141534	0.0178546	0.003	0.003	0.003	0.003	0.003	0.003	0.003	0.003	0.003	0.003	0.003	0.003	0.003	0.003	0.003	0.003	0.003
OR6C68	OR6C68	0	chr12:55886146-55887097	olfactory receptor, family 6, subfamily C, member 68	0.730395	0.00410737	0.003	0.003	0.003	0.003	0.003	0.003	0.003	0.003	0.003	0.003	0.0207179	0.003	0.003	0.003	0.003	0.003	0.003	0.003	0.003	0.003	0.003
OR6C4	OR6C4	0	chr12:55945010-55945937	olfactory receptor, family 6, subfamily C, member 4	520.668	0.003	0.668898	0.0992533	5.29919	0.180677	0.003	0.003	0.003	0.003	0.003	0.003	0.003	0.003	0.003	0.003	0.003	0.003	0.003	0.003	0.003	0.003	0.003
OR2AP1	OR2AP1	0	chr12:55968198-55969125	olfactory receptor, family 2, subfamily AP, member 1	139.051	0.003	0.891863	0.456565	0.265982	0.0542032	0.003	0.003	0.003	0.003	0.003	0.003	0.003	0.003	0.003	0.003	0.003	0.003	0.003	0.003	0.003	0.003	0.003
OR10P1	OR10P1	0	chr12:56030675-56031614	olfactory receptor, family 10, subfamily P, member 1	1.27922	0.0135668	0.003	0.003	0.06042	0.003	0.003	0.003	0.003	0.003	0.003	0.003	0.0210571	0.003	0.003	0.003	0.003	0.003	0.003	0.003	0.154012	0.003	0.003
OR11H12	OR11H12	0	chr14:19377593-19378571	olfactory receptor, family 11, subfamily H, member 12	1	0.003	0.003	0.003	0.003	0.003	0.003	0.003	0.003	0.003	0.003	0.003	0.003	0.003	0.003	0.003	0.003	0.003	0.003	0.003	0.003	0.003	0.003
OR11H2	OR11H2	0	chr14:20181097-20182042	olfactory receptor, family 11, subfamily H, member 2	2.41531	0.003	0.003	0.003	0.0199837	0.003	0.003	0.003	0.003	0.003	0.003	0.003	0.003	0.003	0.003	0.003	0.003	0.003	0.003	0.003	0.003	0.003	0.003
OR4Q3	OR4Q3	0	chr14:20215586-20216525	olfactory receptor, family 4, subfamily Q, member 3	22.1498	0.00642216	0.054827	0.0781568	0.38266	0.0533539	0.003	0.003	0.003	0.003	0.003	0.003	0.003	0.003	0.003	0.003	0.003	0.003	0.003	0.003	0.0577546	0.003	0.003
OR4M1	OR4M1	0	chr14:20248481-20249420	olfactory receptor, family 4, subfamily M, member 1	31.4364	0.0148447	0.219308	0.0390784	0.825741	0.782524	0.003	0.003	0.003	0.003	0.003	0.003	0.003	0.003	0.003	0.003	0.003	0.003	0.003	0.003	0.192515	0.003	0.003
OR4N2	OR4N2	0	chr14:20295607-20296528	olfactory receptor, family 4, subfamily N, member 2	4.14889	0.0176147	0.003	0.003	0.268113	0.0182127	0.003	0.003	0.003	0.003	0.003	0.003	0.003	0.003	0.003	0.003	0.003	0.003	0.003	0.003	0.236835	0.003	0.003
OR4K2	OR4K2	0	chr14:20344426-20345368	olfactory receptor, family 4, subfamily K, member 2	88.9818	0.003	0.163809	0.0583886	0.842584	0.003	0.130868	0.003	0.003	0.003	0.003	0.003	0.003	0.003	0.003	0.003	0.003	0.003	0.003	0.003	0.003	0.003	0.003
OR4K5	OR4K5	0	chr14:20388765-20389734	olfactory receptor, family 4, subfamily K, member 5	10.4409	0.003	0.003	0.003	0.116291	0.003	0.003	0.003	0.003	0.003	0.003	0.003	0.003	0.003	0.003	0.003	0.003	0.003	0.003	0.003	0.003	0.003	0.003
OR4K1	OR4K1	0	chr14:20403825-20404758	olfactory receptor, family 4, subfamily K, member 1	9.14154	0.0100914	0.003	0.003	0.34508	0.0179251	0.003	0.003	0.003	0.003	0.003	0.003	0.003	0.003	0.003	0.003	0.003	0.003	0.003	0.003	0.116463	0.003	0.003
OR4K15	OR4K15	0	chr14:20443749-20444721	olfactory receptor, family 4, subfamily K, member 15	16.5427	0.003	0.003	0.018731	0.173782	0.003	0.003	0.003	0.003	0.003	0.003	0.003	0.003	0.003	0.003	0.003	0.003	0.003	0.003	0.003	0.003	0.003	0.003
OR4K14	OR4K14	0	chr14:20482422-20483352	olfactory receptor, family 4, subfamily K, member 14	172.379	0.003	0.003	0.0395437	1.93602	0.0899805	0.003	0.003	0.003	0.003	0.003	0.003	0.003	0.003	0.003	0.003	0.003	0.003	0.003	0.003	0.003	0.003	0.003
OR4K13	OR4K13	0	chr14:20502005-20502917	olfactory receptor, family 4, subfamily K, member 13	372.788	0.003	0.170785	0.283559	3.94537	0.073738	0.003	0.003	0.003	0.003	0.003	0.003	0.003	0.003	0.003	0.003	0.003	0.003	0.003	0.003	0.003	0.003	0.003
OR4L1	OR4L1	0	chr14:20528203-20529139	olfactory receptor, family 4, subfamily L, member 1	7.04266	0.003	0.003	0.003	0.0606573	0.0178546	0.003	0.003	0.003	0.003	0.003	0.003	0.003	0.003	0.003	0.003	0.003	0.003	0.003	0.003	0.003	0.003	0.003
OR4K17	OR4K17	0	chr14:20585658-20586594	olfactory receptor, family 4, subfamily K, member 17	297.97	0.003	0.0550528	0.0392323	3.35637	0.124982	0.003	0.003	0.003	0.003	0.003	0.003	0.003	0.003	0.003	0.003	0.003	0.003	0.003	0.003	0.003	0.003	0.003
OR4N5	OR4N5	0	chr14:20611894-20612818	olfactory receptor, family 4, subfamily N, member 5	82.7871	0.003	0.11195	0.003	0.842215	0.0362798	0.003	0.003	0.003	0.003	0.003	0.003	0.003	0.003	0.003	0.003	0.003	0.003	0.003	0.003	0.003	0.003	0.003
OR11G2	OR11G2	0	chr14:20665596-20666529	olfactory receptor, family 11, subfamily G, member 2	557.241	0.003	1.76897	0.512036	0.121793	4.28409	0.126088	0.003	0.003	0.003	0.003	0.003	0.003	0.003	0.003	0.003	0.003	0.003	0.003	0.003	0.003	0.003	0.003
OR11H6	OR11H6	0	chr14:20691937-20692858	olfactory receptor, family 11, subfamily H, member 6	13.0843	0.00664036	0.168631	0.140071	0.0206241	0.0182127	0.003	0.003	0.003	0.003	0.003	0.003	0.003	0.003	0.003	0.003	0.003	0.0612457	0.003	0.003	0.003	0.003	0.003
OR11H4	OR11H4	0	chr14:20710980-20711922	olfactory receptor, family 11, subfamily H, member 4	14.1577	0.0154321	0.0546031	0.603348	0.180554	0.0354305	0.0434232	0.003	0.0651164	0.122965	0.003	0.003	0.003	0.003	0.003	0.003	0.003	0.0198327	0.003	0.003	0.003	0.003	0.003
OR6S1	OR6S1	0	chr14:21108857-21109850	olfactory receptor, family 6, subfamily S, member 1	3.11419	0.00643276	0.003	0.0365012	0.0376302	0.003	0.0481596	0.003	0.003	0.003	0.003	0.003	0.003	0.003	0.003	0.003	0.0579241	0.003	0.003	0.003	0.003	0.003	0.003
OR5AU1	OR5AU1	0	chr14:21623098-21624031	olfactory receptor, family 5, subfamily AU, member 1	44.3323	0.019542	0.663365	1.92998	0.405977	0.466052	0.0383764	0.003	0.131845	0.003	0.0650616	0.003	0.003	0.003	0.003	0.003	0.003	0.003	0.076766	0.003	0.003	0.003	0.003
OR10G3	OR10G3	0	chr14:22037936-22038875	olfactory receptor, family 10, subfamily G, member 3	885.764	0.003	0.493443	4.27908	3.54464	2.312	0.003	0.003	0.003	0.003	0.003	0.003	0.003	0.003	0.003	0.003	0.003	0.003	0.003	0.003	0.003	0.003	0.003
OR10G2	OR10G2	0	chr14:22102068-22102998	olfactory receptor, family 10, subfamily G, member 2	2.36162	0.0240903	0.05551	0.0593156	0.0407584	0.0719844	0.003	0.003	0.003	0.003	0.003	0.003	0.003	0.003	0.142398	0.201046	0.003	0.003	0.003	0.003	0.003	0.003	0.003
OR4E2	OR4E2	0	chr14:22133296-22134235	olfactory receptor, family 4, subfamily E, member 2	148.718	0.003	0.003	0.0195392	1.22854	0.533539	0.003	0.003	0.003	0.003	0.003	0.003	0.003	0.003	0.003	0.003	0.003	0.003	0.003	0.003	0.003	0.003	0.003
OR6J1	OR6J1	0	chr14:23102675-23103716	olfactory receptor, family 6, subfamily J, member 1 (gene/pseudogene)	48.399	0.003	0.240586	0.0172399	0.319962	0.003	0.003	0.003	0.003	0.003	0.003	0.003	0.003	0.003	0.003	0.003	0.003	0.003	0.003	0.003	0.003	0.003	0.003
OR4F6	OR4F6	0	chr15:102345922-102346858	olfactory receptor, family 4, subfamily F, member 6	28.792	0.003	0.003	0.137313	0.202191	0.003	0.003	0.003	0.003	0.003	0.003	0.003	0.003	0.003	0.003	0.003	0.003	0.003	0.003	0.003	0.003	0.003	0.003
OR4F15	OR4F15	0	chr15:102358389-102359325	olfactory receptor, family 4, subfamily F, member 15	75.9276	0.003	0.003	0.003	0.869422	0.0357091	0.003	0.003	0.003	0.003	0.003	0.003	0.003	0.003	0.003	0.003	0.003	0.003	0.003	0.003	0.003	0.003	0.003
OR4F4	OR4F4	0	chr15:102462347-102463262	olfactory receptor, family 4, subfamily F, member 4	5.94767	0.003	0.003	0.003	0.0623721	0.003	0.003	0.003	0.003	0.003	0.003	0.003	0.003	0.003	0.003	0.003	0.003	0.003	0.003	0.003	0.003	0.003	0.003
OR4M2	OR4M2	0	chr15:22368575-22369514	olfactory receptor, family 4, subfamily M, member 2	0.445858	0.0067286	0.003	0.003	0.003	0.003	0.003	0.003	0.003	0.003	0.003	0.003	0.003	0.003	0.003	0.003	0.003	0.003	0.003	0.003	0.0626576	0.003	0.003
OR4N4	OR4N4	0	chr15:22382472-22383420	olfactory receptor, family 4, subfamily N, member 4	0.0453197	0.359251	0.003	0.0193119	0.0398128	0.003	0.003	0.003	0.003	0.003	0.003	0.003	0.003	0.003	0.003	0.003	0.003	0.003	0.003	0.003	5.68638	0.019643	0.003
OR1F1	OR1F1	0	chr16:3254246-3255182	olfactory receptor, family 1, subfamily F, member 1	0.121773	0.024636	0.003	0.003	0.003	0.003	0.003	0.003	0.0437678	0.272747	0.003	0.003	0.003	0.003	0.003	0.003	0.003	0.003	0.003	0.003	0.0386613	0.003	0.003
OR2C1	OR2C1	0	chr16:3405940-3406876	olfactory receptor, family 2, subfamily C, member 1	2.00172	0.038667	0.0550528	0.0392323	0.161753	0.0535637	0.003	0.003	0.0437678	0.0247952	0.0647942	0.003	0.003	0.003	0.003	0.003	0.003	0.27994	0.003	0.003	0.0193307	0.139762	0.0192828
OR1D5	OR1D5	0	chr17:2965965-2966901	olfactory receptor, family 1, subfamily D, member 5	4.88378	0.00402067	0.003	0.0196161	0.0202191	0.0357091	0.003	0.003	0.003	0.003	0.003	0.003	0.003	0.003	0.003	0.003	0.003	0.003	0.003	0.003	0.0193307	0.003	0.003
OR1D2	OR1D2	0	chr17:2995354-2996290	olfactory receptor, family 1, subfamily D, member 2	81.7345	0.0167559	0.715686	1.51044	1.39512	1.85688	0.003	0.003	0.003	0.148771	0.003	0.003	0.003	0.003	0.003	0.003	0.003	0.003	0.003	0.003	0.0773227	0.003	0.003
OR1G1	OR1G1	0	chr17:3029906-3030845	olfactory receptor, family 1, subfamily G, member 1	6.80787	0.00651693	0.054827	0.0390784	0.0805601	0.003	0.003	0.003	0.003	0.003	0.0430193	0.003	0.003	0.003	0.003	0.003	0.003	0.003	0.003	0.003	0.0192515	0.003	0.003
OR1A2	OR1A2	0	chr17:3100812-3101739	olfactory receptor, family 1, subfamily A, member 2	1	0.003	0.003	0.003	0.003	0.003	0.003	0.003	0.003	0.003	0.003	0.003	0.003	0.003	0.003	0.003	0.003	0.003	0.003	0.003	0.003	0.003	0.003
OR1A1	OR1A1	0	chr17:3118914-3119841	olfactory receptor, family 1, subfamily A, member 1	34.2828	0.00595059	0.003	0.0198507	0.757027	0.0361354	0.003	0.003	0.003	0.0502095	0.003	0.003	0.003	0.003	0.003	0.003	0.003	0.003	0.003	0.003	0.003	0.003	0.003
OR1D4	OR1D4	0	chr17:3143969-3144905	olfactory receptor, family 1, subfamily D, member 4 (gene/pseudogene)	20.9424	0.003	0.0550528	0.0392323	0.121315	0.0357091	0.003	0.003	0.003	0.003	0.003	0.003	0.003	0.003	0.003	0.003	0.003	0.003	0.003	0.003	0.003	0.003	0.003
OR3A2	OR3A2	0	chr17:3181266-3182211	olfactory receptor, family 3, subfamily A, member 2	1.28768	0.0300855	0.0543809	0.003	0.0799346	0.0176464	0.003	0.003	0.0216173	0.003	0.003	0.003	0.003	0.003	0.003	0.003	0.003	0.0197521	0.003	0.003	0.400999	0.003	0.003
OR3A1	OR3A1	0	chr17:3194931-3195876	olfactory receptor, family 3, subfamily A, member 1	5.45584	0.0139904	0.0543809	0.13571	0.0799346	0.0352928	0.003	0.003	0.003	0.003	0.106675	0.003	0.0208862	0.003	0.003	0.003	0.003	0.003	0.003	0.003	0.0572856	0.003	0.003
OR3A4	OR3A4	0	chr17:3213604-3214648		18.8909	0.00386494	0.003	0.188985	0.0531435	0.0469212		0.003	0.003	0.003	0.003	0.003	0.003	0.003	0.003	0.003	0.003	0.003	0.003	0.003	0.0168391	0.003	0.003
OR1E1	OR1E1	0	chr17:3300762-3301704	olfactory receptor, family 1, subfamily E, member 1	2.65008	0.0354086	0.109206	0.0973143	0.0802461	0.0885762	0.003	0.003	0.0868219	0.003	0.21422	0.003	0.003	0.003	0.003	0.003	0.003	0.003	0.003	0.171977	0.0575192	0.003	0.003
OR3A3	OR3A3	0	chr17:3323879-3324824	olfactory receptor, family 3, subfamily A, member 3	31.6253	0.0132698	0.435047	0.46529	0.619493	0.158818	0.003	0.003	0.003	0.003	0.003	0.003	0.0208862	0.003	0.003	0.003	0.003	0.003	0.003	0.003	0.0190952	0.003	0.133336
OR1E2	OR1E2	0	chr17:3336166-3337135	olfactory receptor, family 1, subfamily E, member 2	0.469233	0.00639341	0.003	0.003	0.003	0.003	0.003	0.003	0.003	0.0237227	0.003	0.003	0.003	0.003	0.003	0.003	0.003	0.003	0.0365718	0.003	0.003	0.003	0.003
OR4D1	OR4D1	0	chr17:56232514-56233444	olfactory receptor, family 4, subfamily D, member 1	74.6809	0.00593759	0.5551	0.003	1.16161	0.0539883	0.003	0.003	0.003	0.0500015	0.003	0.003	0.003	0.003	0.003	0.003	0.003	0.003	0.003	0.003	0.003	0.003	0.003
OR4D2	OR4D2	0	chr17:56247016-56247937	olfactory receptor, family 4, subfamily D, member 2	33.0545	0.003	0.168631	0.0600304	0.164993	0.003	0.003	0.003	0.003	0.003	0.003	0.003	0.003	0.003	0.003	0.003	0.003	0.003	0.003	0.003	0.003	0.003	0.003
OR4F17	OR4F17	0	chr19:110678-111593	olfactory receptor, family 4, subfamily F, member 17	25.0058	0.003	0.003	0.003	0.29107	0.003	0.003	0.003	0.003	0.003	0.003	0.003	0.003	0.003	0.003	0.003	0.003	0.003	0.003	0.003	0.003	0.003	0.003
OR7C1	OR7C1	0	chr19:14909988-14910948	olfactory receptor, family 7, subfamily C, member 1	66.1143	0.0741962	3.94397	9.52753	5.37127	0.77895	0.0442326	0.003	0.084749	0.120029	0.003	0.0397006	0.003	0.003	0.003	0.003	0.003	0.003	0.148034	0.0932619	0.655035	0.0193304	0.003
OR7A5	OR7A5	0	chr19:14938096-14939053	olfactory receptor, family 7, subfamily A, member 5	35.1683	0.040333	1.81935	2.30988	1.02326	0.521288	0.0451799	0.003	0.003	0.26512	0.0629821	0.0199296	0.003	0.003	0.003	0.003	0.003	0.003	0.003	0.003	0.225481	0.0388152	0.003
OR7A10	OR7A10	0	chr19:14951762-14952689	olfactory receptor, family 7, subfamily A, member 10	43.1611	0.003	0.334449	0.119104	0.0613805	0.003	0.003	0.003	0.003	0.003	0.003	0.003	0.003	0.003	0.003	0.003	0.003	0.003	0.003	0.003	0.003	0.003	0.003
OR7A17	OR7A17	0	chr19:14991240-14992167	olfactory receptor, family 7, subfamily A, member 17	102.323	0.003	0.557415	0.119104	0.388743	0.162609	0.041298	0.003	0.003	0.003	0.003	0.003	0.003	0.003	0.003	0.003	0.003	0.003	0.003	0.003	0.003	0.003	0.003
OR7C2	OR7C2	0	chr19:15052300-15053257	olfactory receptor, family 7, subfamily C, member 2	25.1527	0.003	0.0535102	0.0190899	0.177103	0.0521288	0.003	0.003	0.003	0.003	0.003	0.003	0.003	0.003	0.003	0.003	0.003	0.003	0.003	0.003	0.003	0.003	0.003
OR1I1	OR1I1	0	chr19:15197876-15198821	olfactory receptor, family 1, subfamily I, member 1	268.221	0.003	0.978857	1.86116	0.21982	0.158818	0.003	0.003	0.003	0.003	0.003	0.003	0.003	0.003	0.003	0.003	0.003	0.003	0.003	0.003	0.003	0.003	0.003
OR10H2	OR10H2	0	chr19:15838853-15839798	olfactory receptor, family 10, subfamily H, member 2	3.7809	0.003	0.003	0.0193871	0.0199837	0.003	0.003	0.003	0.003	0.003	0.003	0.003	0.003	0.003	0.003	0.003	0.003	0.003	0.003	0.003	0.003	0.003	0.003
OR10H3	OR10H3	0	chr19:15852202-15853150	olfactory receptor, family 10, subfamily H, member 3	7.59484	0.00966044	0.108321	0.003	0.179157	0.003	0.003	0.109567	0.003	0.003	0.003	0.003	0.003	0.003	0.003	0.003	0.003	0.003	0.003	0.003	0.003	0.003	0.003
OR10H5	OR10H5	0	chr19:15904858-15905803	olfactory receptor, family 10, subfamily H, member 5	635.346	0.003	0.652571	0.407129	6.03506	0.529392	0.003	0.003	0.003	0.003	0.003	0.003	0.003	0.003	0.003	0.003	0.003	0.003	0.003	0.003	0.003	0.003	0.003
OR10H1	OR10H1	0	chr19:15917893-15918847	olfactory receptor, family 10, subfamily H, member 1	43.0722	0.0121388	0.214901	0.34494	1.46177	0.069772	0.0416149	0.003	0.003	0.003	0.003	0.003	0.003	0.003	0.003	0.003	0.003	0.003	0.149221	0.003	0.003	0.003	0.003
OR10H4	OR10H4	0	chr19:16059817-16060765	olfactory receptor, family 10, subfamily H, member 4	89.8848	0.003	0.003	0.003	1.05504	0.0175781	0.003	0.003	0.003	0.003	0.003	0.003	0.003	0.003	0.003	0.003	0.003	0.003	0.003	0.003	0.003	0.003	0.003
OR2Z1	OR2Z1	0	chr19:8841390-8842332	olfactory receptor, family 2, subfamily Z, member 1	67.1804	0.003	0.436824	0.155703	0.160492	0.0531457	0.003	0.003	0.003	0.003	0.003	0.003	0.003	0.003	0.003	0.003	0.003	0.003	0.003	0.003	0.003	0.003	0.003
OR1M1	OR1M1	0	chr19:9203920-9204859	olfactory receptor, family 1, subfamily M, member 1	173.957	0.003	0.109654	0.605715	1.08756	0.284554	0.003	0.003	0.003	0.003	0.003	0.003	0.003	0.003	0.003	0.003	0.003	0.003	0.003	0.003	0.003	0.003	0.003
OR7G2	OR7G2	0	chr19:9212947-9213919	olfactory receptor, family 7, subfamily G, member 2	87.4664	0.003	0.681983	0.003	0.347564	0.01705	0.003	0.003	0.003	0.003	0.003	0.003	0.003	0.003	0.003	0.003	0.003	0.003	0.003	0.003	0.003	0.003	0.003
OR7G1	OR7G1	0	chr19:9225506-9226439	olfactory receptor, family 7, subfamily G, member 1	36.9461	0.003	0.0552805	0.0196937	0.365379	0.003	0.003	0.003	0.003	0.003	0.003	0.003	0.003	0.003	0.003	0.003	0.003	0.003	0.003	0.003	0.003	0.003	0.003
OR7G3	OR7G3	0	chr19:9236690-9237626	olfactory receptor, family 7, subfamily G, member 3	0.429259	0.00698879	0.003	0.003	0.003	0.003	0.003	0.0668207	0.003	0.003	0.003	0.003	0.003	0.003	0.003	0.003	0.003	0.003	0.003	0.003	0.003	0.003	0.003
OR7D2	OR7D2	0	chr19:9296457-9297393	olfactory receptor, family 7, subfamily D, member 2	3.11221	0.109476	0.440422	0.137313	0.606573	0.178546	0.003	0.0222736	0.003	0.123976	0.003	0.061509	0.003	0.003	0.0470757	0.159515	0.003	0.003	0.003	0.0192657	0.831219	0.003	0.462788
OR7D4	OR7D4	0	chr19:9324577-9325513	olfactory receptor, family 7, subfamily D, member 4	709.062	0.003	3.57843	2.90319	1.45578	0.571346	0.003	0.003	0.003	0.003	0.003	0.003	0.003	0.003	0.003	0.003	0.003	0.003	0.003	0.003	0.003	0.003	0.003
OR7E24	OR7E24	0	chr19:9361719-9362736	olfactory receptor, family 7, subfamily E, member 24	19.8823	0.0463119	0.445895	0.124116	3.0163	0.0968449	0.003	0.003	0.003	0.003	0.003	0.003	0.003	0.003	0.003	0.003	0.003	0.003	0.003	0.003	0.695991	0.003	0.003
OR6B2	OR6B2	0	chr2:240968910-240969846	olfactory receptor, family 6, subfamily B, member 2	0.588142	0.019483	0.003	0.0196161	0.0202191	0.003	0.003	0.003	0.003	0.003	0.003	0.003	0.0422874	0.003	0.003	0.003	0.003	0.003	0.133788	0.003	0.0966533	0.003	0.003
OR6B3	OR6B3	0	chr2:240984496-240985489	olfactory receptor, family 6, subfamily B, member 3	4.22326	0.0119689	0.102115	0.003	0.0940755	0.003	0.003	0.0206602	0.003	0.0459983	0.003	0.003	0.003	0.003	0.003	0.003	0.003	0.003	0.0709128	0.003	0.0179304	0.003	0.003
OR11H1	OR11H1	0	chr22:16448826-16449771	olfactory receptor, family 11, subfamily H, member 1	2.41531	0.003	0.003	0.003	0.0199837	0.003	0.003	0.003	0.003	0.003	0.003	0.003	0.003	0.003	0.003	0.003	0.003	0.003	0.003	0.003	0.003	0.003	0.003
OR5AC2	OR5AC2	0	chr3:97806016-97806943	olfactory receptor, family 5, subfamily AC, member 2	19.3305	0.003	0.222966	0.003	0.003	0.003	0.003	0.003	0.003	0.003	0.003	0.003	0.003	0.003	0.003	0.003	0.003	0.003	0.003	0.003	0.003	0.003	0.003
OR5H1	OR5H1	0	chr3:97851541-97852480	olfactory receptor, family 5, subfamily H, member 1	94.7367	0.003	0.003	0.003	1.12784	0.003	0.003	0.003	0.003	0.003	0.003	0.003	0.003	0.003	0.003	0.003	0.003	0.003	0.003	0.003	0.003	0.003	0.003
OR5H14	OR5H14	0	chr3:97868229-97869159	olfactory receptor, family 5, subfamily H, member 14	19.9412	0.003	0.11102	0.003	0.122275	0.003	0.003	0.003	0.003	0.003	0.003	0.003	0.003	0.003	0.003	0.003	0.003	0.003	0.003	0.003	0.003	0.003	0.003
OR5H15	OR5H15	0	chr3:97887543-97888482	olfactory receptor, family 5, subfamily H, member 15	36.0146	0.003	0.054827	0.0195392	0.32224	0.0355693	0.003	0.003	0.003	0.003	0.003	0.003	0.003	0.003	0.003	0.003	0.003	0.003	0.003	0.003	0.003	0.003	0.003
OR5H6	OR5H6	0	chr3:97983176-97984103	olfactory receptor, family 5, subfamily H, member 6	4.16003	0.003	0.003	0.003	0.0409204	0.003	0.003	0.003	0.003	0.003	0.003	0.003	0.003	0.003	0.003	0.003	0.003	0.003	0.003	0.003	0.003	0.003	0.003
OR5H2	OR5H2	0	chr3:98001746-98002673	olfactory receptor, family 5, subfamily H, member 2	0.710568	0.00422198	0.003	0.003	0.003	0.003	0.003	0.0225516	0.003	0.003	0.003	0.003	0.003	0.003	0.003	0.003	0.003	0.003	0.003	0.003	0.003	0.003	0.003
OR5K4	OR5K4	0	chr3:98072697-98073660	olfactory receptor, family 5, subfamily K, member 4	3.70612	0.003	0.003	0.0189447	0.0195288	0.003	0.003	0.003	0.003	0.003	0.003	0.003	0.003	0.003	0.003	0.003	0.003	0.003	0.003	0.003	0.003	0.003	0.003
OR5K3	OR5K3	0	chr3:98109509-98110472	olfactory receptor, family 5, subfamily K, member 3	1	0.003	0.003	0.003	0.003	0.003	0.003	0.003	0.003	0.003	0.003	0.003	0.003	0.003	0.003	0.003	0.003	0.003	0.003	0.003	0.003	0.003	0.003
OR5K1	OR5K1	0	chr3:98188420-98189344	olfactory receptor, family 5, subfamily K, member 1	166.882	0.00549964	0.615724	0.259091	2.5061	0.290238	0.003	0.003	0.003	0.003	0.003	0.003	0.0429942	0.003	0.003	0.003	0.003	0.003	0.003	0.003	0.003	0.003	0.003
OR5K2	OR5K2	0	chr3:98216524-98217472	olfactory receptor, family 5, subfamily K, member 2	1.65769	0.121681	0.216642	0.193119	0.238877	0.158203	0.0683394	0.003	0.387539	0.0731825	0.233736	0.0403428	0.003	0.103212	0.003	0.0588504	0.327666	0.393445	0.075214	0.003	0.003	0.235716	0.003
OR2Y1	OR2Y1	0	chr5:180166125-180167058	olfactory receptor, family 2, subfamily Y, member 1	11.405	0.003	0.110561	0.003	0.0202988	0.003	0.003	0.003	0.003	0.003	0.003	0.003	0.003	0.003	0.003	0.003	0.003	0.003	0.003	0.003	0.003	0.003	0.003
OR2V1	OR2V1	0	chr5:180551359-180552304	olfactory receptor, family 2, subfamily V, member 1	17.502	0.076476	0.326286	0.0775484	3.39722	1.55288	0.003	0.003	0.003	0.0244932	0.003	0.003	0.003	0.003	0.003	0.003	0.003	0.493804	0.003	0.003	0.0381904	0.631129	0.003
OR2V2	OR2V2	0	chr5:180581942-180582887	olfactory receptor, family 2, subfamily V, member 2	162.798	0.00775054	0.489428	0.0193871	3.49714	1.04114	0.003	0.003	0.003	0.003	0.003	0.003	0.003	0.003	0.003	0.003	0.003	0.0790086	0.003	0.003	0.003	0.003	0.003
OR4F3	OR4F3	0	chr5:180794287-180795223	olfactory receptor, family 4, subfamily F, member 3	1.09041	0.00346591	0.00611698	0.003	0.003	0.003	0.0241104	0.003	0.00486309	0.003	0.003	0.003	0.003	0.003	0.003	0.003	0.003	0.003	0.003	0.003	0.00859141	0.003	0.003
OR2A4	OR2A4	0	chr6:132021611-132022541	olfactory receptor, family 2, subfamily A, member 4	2.07045	0.0133903	0.003	0.003	0.101896	0.003	0.003	0.003	0.003	0.003	0.003	0.003	0.003	0.169245	0.003	0.003	0.003	0.003	0.003	0.003	0.003	0.003	0.003
OR2B2	OR2B2	0	chr6:27879026-27880097	olfactory receptor, family 2, subfamily B, member 2	0.294858	0.0101744	0.003	0.003	0.003	0.003	0.003	0.003	0.003	0.003	0.003	0.003	0.003	0.003	0.003	0.11779	0.003	0.003	0.003	0.003	0.003	0.003	0.003
OR2B6	OR2B6	0	chr6:27925018-27925957	olfactory receptor, family 2, subfamily B, member 6	0.153774	0.0435455	0.003	0.003	0.003	0.0177846	0.003	0.0443648	0.0217943	0.003	0.003	0.003	0.003	0.003	0.003	0.003	0.33169	0.003	0.003	0.134308	0.0577546	0.003	0.0768156
OR1F12	OR1F12	0	chr6:28041093-28042014	olfactory receptor, family 1, subfamily F, member 12	1.93959	0.0311165	0.003	0.0600304	0.123745	0.054638	0.003	0.003	0.022343	0.101262	0.003	0.003	0.003	0.0428439	0.003	0.003	0.003	0.122491	0.003	0.003	0.138154	0.0407698	0.003
OR2W1	OR2W1	0	chr6:29011992-29012952	olfactory receptor, family 2, subfamily W, member 1	1.03955	0.0115931	0.003	0.003	0.0392064	0.003	0.003	0.003	0.003	0.003	0.003	0.003	0.003	0.003	0.003	0.003	0.003	0.003	0.003	0.003	0.14049	0.003	0.003
OR2B3	OR2B3	0	chr6:29054086-29055025	olfactory receptor, family 2, subfamily B, member 3	2.42833	0.003	0.003	0.003	0.02014	0.003	0.003	0.003	0.003	0.003	0.003	0.003	0.003	0.003	0.003	0.003	0.003	0.003	0.003	0.003	0.003	0.003	0.003
OR2J3	OR2J3	0	chr6:29079667-29080600	olfactory receptor, family 2, subfamily J, member 3	81.7535	0.00760281	0.110561	0.0196937	2.21257	0.1434	0.003	0.003	0.003	0.003	0.003	0.003	0.003	0.003	0.003	0.003	0.003	0.0602346	0.003	0.003	0.0194104	0.003	0.003
OR2J2	OR2J2	0	chr6:29141412-29142348	olfactory receptor, family 2, subfamily J, member 2	21.8258	0.0148942	0.110106	0.215778	0.545916	0.42851	0.003	0.003	0.003	0.003	0.003	0.003	0.003	0.003	0.003	0.003	0.003	0.003	0.003	0.003	0.193307	0.003	0.003
OR14J1	OR14J1	0	chr6:29274466-29275429	olfactory receptor, family 14, subfamily J, member 1	40.9242	0.0144632	0.265426	0.151558	1.93335	0.0172443	0.003	0.003	0.003	0.003	0.003	0.003	0.003	0.003	0.003	0.003	0.003	0.003	0.003	0.003	0.186411	0.003	0.003
OR5V1	OR5V1	0	chr6:29323009-29323972	olfactory receptor, family 5, subfamily V, member 1	39.9509	0.0284441	0.796278	0.32206	2.9098	0.517328	0.003	0.003	0.003	0.003	0.003	0.003	0.003	0.003	0.003	0.003	0.003	0.003	0.003	0.003	0.410105	0.003	0.003
OR12D3	OR12D3	0	chr6:29342116-29343064	olfactory receptor, family 12, subfamily D, member 3	20.277	0.003	0.162482	0.0579358	0.0199064	0.003	0.003	0.003	0.003	0.003	0.003	0.003	0.003	0.003	0.003	0.003	0.003	0.003	0.003	0.003	0.003	0.003	0.003
OR12D2	OR12D2	0	chr6:29364476-29365397	olfactory receptor, family 12, subfamily D, member 2	137.621	0.00408845	0.899364	0.960487	0.226865	0.163914	0.003	0.003	0.003	0.003	0.003	0.003	0.003	0.003	0.003	0.003	0.003	0.0204152	0.003	0.003	0.003	0.003	0.003
OR11A1	OR11A1	0	chr6:29394473-29395418	olfactory receptor, family 11, subfamily A, member 1	826.297	0.003	0.652571	0.310194	7.29404	1.65876	0.003	0.003	0.003	0.003	0.003	0.003	0.003	0.003	0.003	0.003	0.003	0.003	0.003	0.003	0.003	0.003	0.003
OR10C1	OR10C1	0	chr6:29407792-29408728	olfactory receptor, family 10, subfamily C, member 1	11.5272	0.003	0.0550528	0.0196161	0.0606573	0.003	0.003	0.003	0.003	0.003	0.003	0.003	0.003	0.003	0.003	0.003	0.003	0.003	0.003	0.003	0.003	0.003	0.003
OR2H1	OR2H1	0	chr6:29429546-29430494	olfactory receptor, family 2, subfamily H, member 1	0.325778	0.0527348	0.003	0.003	0.0597192	0.003	0.003	0.003	0.003	0.003	0.003	0.003	0.003	0.003	0.003	0.003	0.003	0.003	0.003	0.003	0.798756	0.003	0.003
OR2H2	OR2H2	0	chr6:29555721-29556657	olfactory receptor, family 2, subfamily H, member 2	2.41349	0.0564347	0.110106	0.0980807	0.283068	0.0535637	0.0887754	0.003	0.0437678	0.123976	0.003	0.003	0.0422874	0.003	0.003	0.003	0.104079	0.003	0.152901	0.003	0.405944	0.003	0.003
OR9A4	OR9A4	0	chr7:141618675-141619617	olfactory receptor, family 9, subfamily A, member 4	3.57842	0.0211115	0.109206	0.0194629	0.120369	0.0531457	0.003	0.003	0.003	0.003	0.003	0.003	0.003	0.104053	0.003	0.003	0.003	0.003	0.003	0.003	0.191731	0.003	0.003
OR9A2	OR9A2	0	chr7:142723289-142724219	olfactory receptor, family 9, subfamily A, member 2	0.94667	0.0121878	0.003	0.0197719	0.0203792	0.003	0.0457239	0.003	0.003	0.150004	0.003	0.003	0.003	0.003	0.003	0.003	0.003	0.003	0.003	0.003	0.003	0.003	0.003
OR6V1	OR6V1	0	chr7:142749437-142750376	olfactory receptor, family 6, subfamily V, member 1	0.355619	0.008436	0.003	0.003	0.003	0.003	0.003	0.003	0.0435886	0.0493874	0.003	0.003	0.003	0.003	0.003	0.003	0.003	0.003	0.003	0.003	0.003	0.003	0.003
OR2F2	OR2F2	0	chr7:143632325-143633276	olfactory receptor, family 2, subfamily F, member 2	8.44847	0.0095135	0.003	0.0577121	0.257786	0.003	0.003	0.003	0.107216	0.003	0.003	0.003	0.003	0.003	0.003	0.003	0.003	0.003	0.003	0.003	0.003	0.003	0.003
OR2F1	OR2F1	0	chr7:143657063-143658014	olfactory receptor, family 2, subfamily F, member 1 (gene/pseudogene)	34.7965	0.003	0.107884	0.0961868	0.178467	0.0350206	0.003	0.003	0.003	0.003	0.003	0.003	0.003	0.003	0.003	0.003	0.003	0.003	0.003	0.003	0.003	0.003	0.003
OR6B1	OR6B1	0	chr7:143701089-143702022	olfactory receptor, family 6, subfamily B, member 1	724.927	0.003	1.21617	0.768054	5.76487	0.950028	0.003	0.003	0.003	0.003	0.003	0.003	0.003	0.003	0.003	0.003	0.003	0.003	0.003	0.003	0.003	0.003	0.003
OR2A5	OR2A5	0	chr7:143747494-143748427	olfactory receptor, family 2, subfamily A, member 5	142.643	0.00538595	0.663365	1.28009	1.07584	0.0537752	0.003	0.003	0.003	0.003	0.003	0.0411752	0.003	0.003	0.003	0.003	0.003	0.003	0.003	0.003	0.003	0.003	0.003
OR2A25	OR2A25	0	chr7:143771312-143772242	olfactory receptor, family 2, subfamily A, member 25	78.7167	0.00524886	0.72163	0.336122	0.163034	0.431907	0.003	0.003	0.003	0.003	0.003	0.003	0.003	0.003	0.003	0.003	0.003	0.003	0.003	0.003	0.0389818	0.003	0.003
OR2A12	OR2A12	0	chr7:143792200-143793130	olfactory receptor, family 2, subfamily A, member 12	114.022	0.00694974	0.22204	2.3924	0.285309	0.269942	0.003	0.003	0.0661958	0.003	0.003	0.003	0.003	0.003	0.003	0.003	0.003	0.003	0.003	0.003	0.003	0.003	0.003
OR2A2	OR2A2	0	chr7:143806675-143807629	olfactory receptor, family 2, subfamily A, member 2	4.40713	0.00651249	0.0537253	0.0383267	0.0197536	0.003	0.003	0.003	0.0427144	0.003	0.003	0.003	0.003	0.003	0.003	0.003	0.003	0.003	0.003	0.003	0.003	0.0194854	0.003
OR2A14	OR2A14	0	chr7:143826205-143827135	olfactory receptor, family 2, subfamily A, member 14	29.0359	0.00403068	0.11102	0.336122	0.003	0.0179961	0.003	0.003	0.003	0.003	0.003	0.003	0.003	0.003	0.003	0.003	0.003	0.003	0.003	0.003	0.0194909	0.003	0.003
OR2A42	OR2A42	0	chr7:143929006-143929936	olfactory receptor, family 2, subfamily A, member 42	4.86885	0.00417357	0.05551	0.0197719	0.003	0.003	0.003	0.003	0.003	0.003	0.0217771	0.003	0.003	0.003	0.003	0.003	0.003	0.003	0.003	0.003	0.003	0.003	0.003
OR2A7	OR2A7	0	chr7:143955791-143956721	olfactory receptor, family 2, subfamily A, member 7	3.08383	0.217072	0.523904	1.11957	0.770057	0.264126	0.003	0.0898327	0.373546	0.003	0.0910796	0.103365	0.003	0.273632	0.1705	0.194829	0.003	0.447065	0.327608	0.003	0.143793	0.934824	0.311083
OR2A1	OR2A1	0	chr7:144015217-144016147	olfactory receptor, family 2, subfamily A, member 1	64.215	0.00510327	0.003	0.237262	0.99858	0.0719844	0.003	0.003	0.003	0.003	0.003	0.003	0.003	0.003	0.003	0.003	0.003	0.0201614	0.003	0.003	0.0194909	0.003	0.003
OR2AE1	OR2AE1	0	chr7:99473687-99474656	olfactory receptor, family 2, subfamily AE, member 1	3.25589	0.0264553	0.263335	0.0752067	0.003	0.003	0.003	0.003	0.125624	0.0474454	0.103319	0.003	0.0404582	0.003	0.003	0.003	0.003	0.0191308	0.003	0.003	0.003	0.057307	0.003
OR4F21	OR4F21	0	chr8:116088-117024	olfactory receptor, family 4, subfamily F, member 21	3.6882	0.00346591	0.00611698	0.0217957	0.0202191	0.003	0.0241104	0.003	0.00486309	0.003	0.003	0.003	0.003	0.003	0.003	0.003	0.003	0.003	0.003	0.003	0.00859141	0.003	0.003
OR13F1	OR13F1	0	chr9:107266543-107267500	olfactory receptor, family 13, subfamily F, member 1	0.694627	0.00431886	0.003	0.003	0.003	0.003	0.003	0.003	0.003	0.0241018	0.003	0.003	0.003	0.003	0.003	0.003	0.003	0.003	0.003	0.003	0.003	0.003	0.003
OR13C4	OR13C4	0	chr9:107288536-107289490	olfactory receptor, family 13, subfamily C, member 4	2.34694	0.003	0.003	0.0191633	0.003	0.003	0.003	0.003	0.003	0.003	0.003	0.003	0.003	0.003	0.003	0.003	0.003	0.003	0.003	0.003	0.003	0.003	0.003
OR13C3	OR13C3	0	chr9:107298053-107299004	olfactory receptor, family 13, subfamily C, member 3	0.930958	0.0572691	0.0539421	0.003	0.138808	0.0175103	0.003	0.003	0.003	0.003	0.003	0.003	0.003	0.003	0.003	0.003	0.003	0.003	0.003	0.003	0.871305	0.003	0.003
OR13C8	OR13C8	0	chr9:107331448-107332408	olfactory receptor, family 13, subfamily C, member 8	1	0.003	0.003	0.003	0.003	0.003	0.003	0.003	0.003	0.003	0.003	0.003	0.003	0.003	0.003	0.003	0.003	0.003	0.003	0.003	0.003	0.003	0.003
OR13C5	OR13C5	0	chr9:107360740-107361694	olfactory receptor, family 13, subfamily C, member 5	1.51695	0.0103745	0.003	0.003	0.0395072	0.017443	0.003	0.003	0.003	0.120992	0.003	0.003	0.003	0.003	0.003	0.003	0.003	0.003	0.003	0.003	0.003	0.003	0.003
OR13C2	OR13C2	0	chr9:107366954-107367908	olfactory receptor, family 13, subfamily C, member 2	1.19707	0.0101304	0.003	0.003	0.0395072	0.003	0.003	0.003	0.003	0.003	0.003	0.003	0.003	0.003	0.003	0.003	0.003	0.117087	0.003	0.003	0.003	0.003	0.003
OR13C9	OR13C9	0	chr9:107379531-107380485	olfactory receptor, family 13, subfamily C, member 9	6.27233	0.00824688	0.107451	0.003	0.0790145	0.017443	0.003	0.08695	0.003	0.003	0.003	0.003	0.003	0.003	0.003	0.003	0.003	0.003	0.003	0.003	0.003	0.003	0.003
OR13D1	OR13D1	0	chr9:107456798-107457740	olfactory receptor, family 13, subfamily D, member 1	3.18298	0.00781726	0.0546031	0.0389257	0.003	0.003	0.0422163	0.003	0.0434109	0.003	0.003	0.003	0.003	0.003	0.003	0.003	0.003	0.0396653	0.003	0.003	0.003	0.003	0.003
OR2K2	OR2K2	0	chr9:114089765-114090713	olfactory receptor, family 2, subfamily K, member 2	1.92106	0.0455053	0.216642	0.003	0.0597192	0.0703123	0.0510741	0.003	0.003	0.121971	0.0849949	0.003	0.104009	0.003	0.003	0.003	0.003	0.003	0.003	0.003	0.266252	0.117858	0.003
OR1J1	OR1J1	0	chr9:125239287-125240205	olfactory receptor, family 1, subfamily J, member 1	16.9472	0.024707	0.508028	0.763453	0.165657	0.237718	0.003	0.003	0.314121	0.003	0.003	0.003	0.003	0.003	0.003	0.003	0.003	0.003	0.0391917	0.003	0.003	0.003	0.003
OR1J2	OR1J2	0	chr9:125273080-125274019	olfactory receptor, family 1, subfamily J, member 2	33.716	0.003	0.109654	0.156314	0.12084	0.0177846	0.003	0.003	0.003	0.003	0.003	0.003	0.003	0.003	0.003	0.003	0.003	0.003	0.003	0.003	0.003	0.003	0.003
OR1J4	OR1J4	0	chr9:125281419-125282358	olfactory receptor, family 1, subfamily J, member 4	15.9887	0.00876075	0.383789	0.0781568	0.0805601	0.0177846	0.003	0.003	0.003	0.003	0.003	0.003	0.003	0.003	0.003	0.003	0.003	0.003	0.095172	0.003	0.003	0.003	0.003
OR1N1	OR1N1	0	chr9:125288639-125289572	olfactory receptor, family 1, subfamily N, member 1	24.5324	0.0127868	0.110561	0.433261	0.101494	0.609452	0.0521262	0.003	0.0878968	0.0746926	0.003	0.003	0.003	0.003	0.003	0.003	0.003	0.003	0.003	0.003	0.003	0.003	0.003
OR1N2	OR1N2	0	chr9:125315490-125316438	olfactory receptor, family 1, subfamily N, member 2	7.91376	0.00550374	0.0541606	0.0772478	0.0398128	0.003	0.003	0.003	0.0430599	0.003	0.003	0.003	0.003	0.003	0.003	0.003	0.003	0.003	0.003	0.003	0.003	0.003	0.003
OR1L8	OR1L8	0	chr9:125329829-125330756	olfactory receptor, family 1, subfamily L, member 8	2.50814	0.0619805	0.111483	0.158805	0.225062	0.126474	0.0889834	0.112758	0.177257	0.225943	0.003	0.003	0.003	0.0849746	0.0476634	0.003	0.003	0.101227	0.003	0.003	0.137004	0.0808609	0.003
OR1Q1	OR1Q1	0	chr9:125377016-125377958	olfactory receptor, family 1, subfamily Q, member 1	39.1225	0.003	0.163809	0.116777	0.100308	0.0885762	0.003	0.003	0.003	0.003	0.003	0.003	0.003	0.003	0.003	0.003	0.003	0.003	0.003	0.003	0.003	0.003	0.003
OR1B1	OR1B1	0	chr9:125390860-125391814	olfactory receptor, family 1, subfamily B, member 1	2.21894	0.015989	0.003	0.0766534	0.0592609	0.003	0.003	0.003	0.0640716	0.0967939	0.003	0.003	0.003	0.003	0.003	0.003	0.003	0.003	0.0559579	0.003	0.003	0.003	0.003
OR1L1	OR1L1	0	chr9:125423994-125424924	olfactory receptor, family 1, subfamily L, member 1	37.9673	0.003	0.11102	0.158175	0.183413	0.003	0.0523416	0.003	0.003	0.003	0.003	0.003	0.003	0.003	0.003	0.003	0.003	0.003	0.003	0.003	0.003	0.003	0.003
OR1L3	OR1L3	0	chr9:125437408-125438380	olfactory receptor, family 1, subfamily L, member 3	2.51434	0.0212364	0.10492	0.037462	0.003	0.0682	0.166825	0.106133	0.003	0.0236298	0.003	0.003	0.003	0.003	0.003	0.171019	0.003	0.003	0.003	0.003	0.003	0.003	0.003
OR1L4	OR1L4	0	chr9:125486268-125487201	olfactory receptor, family 1, subfamily L, member 4	8.44966	0.00903689	0.0552805	0.137856	0.0405977	0.0717002	0.003	0.003	0.003	0.0995902	0.003	0.003	0.003	0.003	0.003	0.003	0.003	0.003	0.003	0.003	0.003	0.003	0.003
OR1L6	OR1L6	0	chr9:125512126-125513059	olfactory receptor, family 1, subfamily L, member 6	1.26664	0.00907763	0.003	0.0196937	0.0202988	0.003	0.003	0.003	0.003	0.003	0.003	0.003	0.003	0.003	0.003	0.003	0.003	0.003	0.003	0.003	0.003	0.100242	0.003
OR5C1	OR5C1	0	chr9:125551211-125552171	olfactory receptor, family 5, subfamily C, member 1	21.6842	0.00913486	0.159891	0.361323	0.0980159	0.1731	0.003	0.003	0.003	0.0480118	0.003	0.003	0.003	0.003	0.003	0.003	0.003	0.003	0.003	0.003	0.0561459	0.003	0.003
OR1K1	OR1K1	0	chr9:125562401-125563349	olfactory receptor, family 1, subfamily K, member 1	3.75949	0.012488	0.162482	0.0193119	0.003	0.003	0.003	0.003	0.0430599	0.0975767	0.003	0.0201714	0.003	0.003	0.003	0.003	0.003	0.003	0.003	0.003	0.003	0.003	0.003
OR13J1	OR13J1	0	chr9:35869462-35870398	olfactory receptor, family 13, subfamily J, member 1	2.87726	0.0241691	0.0550528	0.0196161	0.0606573	0.142837	0.003	0.003	0.0218839	0.272747	0.003	0.003	0.003	0.003	0.003	0.003	0.003	0.0199957	0.0191126	0.003	0.003	0.019966	0.003
OR2S2	OR2S2	0	chr9:35957138-35958095	olfactory receptor, family 2, subfamily S, member 2	3.98875	0.00766557	0.003	0.0572697	0.0590344	0.003	0.003	0.003	0.003	0.003	0.003	0.0398592	0.003	0.0407899	0.003	0.003	0.003	0.003	0.003	0.003	0.003	0.003	0.003
OR13H1	OR13H1	0	chrX:130678047-130678971	olfactory receptor, family 13, subfamily H, member 1	1	0.003	0.003	0.003	0.003	0.003	0.003	0.003	0.003	0.003	0.003	0.003	0.003	0.003	0.003	0.003	0.003	0.003	0.003	0.003	0.003	0.003	0.003
OR11I1P	OR11I1P	1	chr1:111396560-111397511	olfactory receptor, family 11, subfamily I, member 1 pseudogene	0.302367	0.00992173	0.003	0.003	0.003	0.003	0.003	0.003	0.003	0.0971837	0.003	0.003	0.003	0.003	0.003	0.003	0.003	0.003	0.003	0.003	0.003	0.0195639	0.003
OR13Z1P	OR13Z1P	1	chr1:146890731-146891624	olfactory receptor, family 13, subfamily Z, member 1 pseudogene	1	0.003	0.003	0.003	0.003	0.003	0.003	0.003	0.003	0.003	0.003	0.003	0.003	0.003	0.003	0.003	0.003	0.003	0.003	0.003	0.003	0.003	0.003
OR13Z2P	OR13Z2P	1	chr1:146917310-146917866	olfactory receptor, family 13, subfamily Z, member 2 pseudogene	0.107087	0.0280147	0.003	0.003	0.003	0.003		0.003	0.003	0.003	0.003	0.003	0.003	0.003	0.003	0.003	0.003	0.003	0.003	0.003	0.403235	0.003	0.003
OR10T1P	OR10T1P	1	chr1:158414862-158415804	olfactory receptor, family 10, subfamily T, member 1 pseudogene	0.417582	0.015994	0.003	0.003	0.003	0.0177152	0.003	0.003	0.003	0.003	0.003	0.003	0.003	0.003	0.003	0.003	0.003	0.003	0.003	0.003	0.210904	0.003	0.003
OR10R3P	OR10R3P	1	chr1:158461008-158461947	olfactory receptor, family 10, subfamily R, member 3 pseudogene	21.406	0.003	0.054827	0.003	0.18126	0.0177846	0.003	0.003	0.003	0.003	0.003	0.003	0.003	0.003	0.003	0.003	0.003	0.003	0.003	0.003	0.003	0.003	0.003
OR10R1P	OR10R1P	1	chr1:158484690-158485715	olfactory receptor, family 10, subfamily R, member 1 pseudogene	3.76819	0.003	0.003	0.003	0.0362183	0.003	0.003	0.003	0.003	0.003	0.003	0.003	0.003	0.003	0.003	0.003	0.003	0.003	0.003	0.003	0.003	0.003	0.003
OR6K1P	OR6K1P	1	chr1:158664328-158665299	olfactory receptor, family 6, subfamily K, member 1 pseudogene	1	0.003	0.003	0.003	0.003	0.003	0.003	0.003	0.003	0.003	0.003	0.003	0.003	0.003	0.003	0.003	0.003	0.003	0.003	0.003	0.003	0.003	0.003
OR6K4P	OR6K4P	1	chr1:158693944-158694826	olfactory receptor, family 6, subfamily K, member 4 pseudogene	30.9213	0.003	0.118921	0.126676	0.0870289	0.0384293	0.003	0.003	0.003	0.003	0.003	0.003	0.003	0.003	0.003	0.003	0.003	0.003	0.003	0.003	0.003	0.003	0.003
OR6K5P	OR6K5P	1	chr1:158712357-158713205	olfactory receptor, family 6, subfamily K, member 5 pseudogene	14.625	0.0138029	0.125234	0.510096	0.091407	0.0807306	0.003	0.003	0.003	0.003	0.003	0.003	0.003	0.003	0.003	0.003	0.003	0.003	0.003	0.003	0.175846	0.003	0.003
OR10AA1P	OR10AA1P	1	chr1:158778191-158779125	olfactory receptor, family 10, subfamily AA, member 1 pseudogene	4.02797	0.003	0.003	0.0393356	0.003	0.003	0.003	0.003	0.003	0.003	0.003	0.003	0.003	0.003	0.003	0.003	0.003	0.003	0.003	0.003	0.003	0.003	0.003
OR10J2P	OR10J2P	1	chr1:159248833-159249791	olfactory receptor, family 10, subfamily J, member 2 pseudogene	1	0.003	0.003	0.003	0.003	0.003	0.003	0.003	0.003	0.003	0.003	0.003	0.003	0.003	0.003	0.003	0.003	0.003	0.003	0.003	0.003	0.003	0.003
OR10J7P	OR10J7P	1	chr1:159320840-159321813	olfactory receptor, family 10, subfamily J, member 7 pseudogene	1	0.003	0.003	0.003	0.003	0.003	0.003	0.003	0.003	0.003	0.003	0.003	0.003	0.003	0.003	0.003	0.003	0.003	0.003	0.003	0.003	0.003	0.003
OR10J8P	OR10J8P	1	chr1:159335950-159336876	olfactory receptor, family 10, subfamily J, member 8 pseudogene	57.8469	0.003	0.279095	0.33791	0.0409746	0.0361834	0.003	0.003	0.003	0.003	0.003	0.003	0.003	0.003	0.003	0.003	0.003	0.003	0.003	0.003	0.003	0.003	0.003
OR10J9P	OR10J9P	1	chr1:159375212-159376199	olfactory receptor, family 10, subfamily J, member 9 pseudogene	1	0.003	0.003	0.003	0.003	0.003	0.003	0.003	0.003	0.003	0.003	0.003	0.003	0.003	0.003	0.003	0.003	0.003	0.003	0.003	0.003	0.003	0.003
OR10J4P	OR10J4P	1	chr1:159401993-159402925		34.7921	0.003	0.221427	0.0788788	0.0813022	0.0358974		0.003	0.003	0.003	0.003	0.003	0.003	0.003	0.003	0.003	0.003	0.003	0.003	0.003	0.003	0.003	0.003
OR10AE1P	OR10AE1P	1	chr1:159551412-159552010	olfactory receptor, family 10, subfamily AE, member 1 pseudogene	1	0.003	0.003	0.003	0.003	0.003		0.003	0.003	0.003	0.003	0.003	0.003	0.003	0.003	0.003	0.003	0.003	0.003	0.003	0.003	0.003	0.003
OR10J6P	OR10J6P	1	chr1:159568087-159569014	olfactory receptor, family 10, subfamily J, member 6 pseudogene	0.00697198	0.430294	0.003	0.003	0.003	0.003	0.003	0.003	0.003	0.003	0.003	0.003	0.003	0.003	6.8397	0.003	0.003	0.003	0.003	0.003	0.003	0.003	0.003
OR14L1P	OR14L1P	1	chr1:247782982-247783861	olfactory receptor, family 14, subfamily L, member 1 pseudogene	11.9076	0.0217516	0.0597262	0.106013	0.677336	0.192963	0.003	0.003	0.0712128	0.003	0.003	0.003	0.003	0.091036	0.003	0.003	0.003	0.003	0.003	0.003	0.146777	0.003	0.003
OR3D1P	OR3D1P	1	chr1:247830182-247831118	olfactory receptor, family 3, subfamily D, member 1 pseudogene	0.361102	0.0198116	0.003	0.0196161	0.003	0.003	0.003	0.003	0.003	0.003	0.003	0.003	0.003	0.003	0.003	0.199393	0.003	0.003	0.003	0.003	0.0386613	0.0399319	0.003
OR9H1P	OR9H1P	1	chr1:247938211-247939135	olfactory receptor, family 9, subfamily H, member 1 pseudogene	18.6558	0.0112622	0.003	0.199301	0.493004	0.145119	0.003	0.003	0.003	0.003	0.003	0.003	0.003	0.003	0.003	0.0202726	0.003	0.003	0.003	0.003	0.117923	0.003	0.003
OR6R1P	OR6R1P	1	chr1:247996661-247997590	olfactory receptor, family 6, subfamily R, member 1 pseudogene	4.18591	0.0151685	0.111174	0.0989903	0.0408122	0.003	0.003	0.003	0.003	0.0250353	0.003	0.003	0.003	0.003	0.003	0.003	0.003	0.003	0.003	0.003	0.175661	0.003	0.003
OR2X1P	OR2X1P	1	chr1:248102190-248102935	olfactory receptor, family 2, subfamily X, member 1 pseudogene	5.24342	0.003	0.003	0.003	0.0539211	0.003	0.003	0.003	0.003	0.003	0.003	0.003	0.003	0.003	0.003	0.003	0.003	0.003	0.003	0.003	0.003	0.003	0.003
OR2L9P	OR2L9P	1	chr1:248138043-248138977	olfactory receptor, family 2, subfamily L, member 9 pseudogene	1	0.003	0.003	0.003	0.003	0.003	0.003	0.003	0.003	0.003	0.003	0.003	0.003	0.003	0.003	0.003	0.003	0.003	0.003	0.003	0.003	0.003	0.003
OR2L1P	OR2L1P	1	chr1:248153568-248154493	olfactory receptor, family 2, subfamily L, member 1 pseudogene	1.18817	0.0308347	0.003	0.0995177	0.0410291	0.003	0.003	0.003	0.003	0.003	0.003	0.003	0.003	0.003	0.003	0.003	0.003	0.0203016	0.003	0.003	0.0392529	0.182443	0.215357
OR2L6P	OR2L6P	1	chr1:248166432-248167368	olfactory receptor, family 2, subfamily L, member 6 pseudogene	15.7066	0.006437	0.003	0.0196161	0.363944	0.0178546	0.003	0.003	0.003	0.003	0.003	0.003	0.003	0.003	0.003	0.003	0.003	0.003	0.003	0.003	0.057992	0.003	0.003
OR2T32P	OR2T32P	1	chr1:248246937-248247898	olfactory receptor, family 2, subfamily T, member 32 pseudogene	3.61883	0.0303774	0.003	0.003	0.430723	0.003	0.003	0.003	0.003	0.003	0.003	0.003	0.003	0.003	0.003	0.003	0.003	0.0193335	0.003	0.003	0.003	0.424705	0.003
OR2M1P	OR2M1P	1	chr1:248285233-248286163	olfactory receptor, family 2, subfamily M, member 1 pseudogene	2.24967	0.003	0.003	0.003	0.003	0.0179961	0.003	0.003	0.003	0.003	0.003	0.003	0.003	0.003	0.003	0.003	0.003	0.003	0.003	0.003	0.003	0.003	0.003
OR2AS2P	OR2AS2P	1	chr1:248661610-248661960	olfactory receptor, family 2, subfamily AS, member 2 pseudogene	1	0.003	0.003	0.003	0.003	0.003		0.003	0.003	0.003	0.003	0.003	0.003	0.003	0.003	0.003	0.003	0.003	0.003	0.003	0.003	0.003	0.003
OR2AS1P	OR2AS1P	1	chr1:248712722-248713204	olfactory receptor, family 2, subfamily AS, member 1 pseudogene	1	0.003	0.003	0.003	0.003	0.003		0.003	0.003	0.003	0.003	0.003	0.003	0.003	0.003	0.003	0.003	0.003	0.003	0.003	0.003	0.003	0.003
OR4G4P	OR4G4P	1	chr1:52451-53395	olfactory receptor, family 4, subfamily G, member 4 pseudogene	2.36769	0.003	0.003	0.0194123	0.003	0.003		0.003	0.003	0.003	0.003	0.003	0.003	0.003	0.003	0.003	0.003	0.003	0.003	0.003	0.003	0.003	0.003
OR4G11P	OR4G11P	1	chr1:63014-63884	olfactory receptor, family 4, subfamily G, member 11 pseudogene	14.3007	0.003	0.0605376	0.003	0.0885254	0.0195455	0.003	0.003	0.003	0.003	0.003	0.003	0.003	0.003	0.003	0.003	0.003	0.003	0.003	0.003	0.003	0.003	0.003
OR6L2P	OR6L2P	1	chr10:135243897-135244822	olfactory receptor, family 6, subfamily L, member 2 pseudogene	0.780083	0.0684216	0.167691	0.0398071	0.003	0.003		0.0452287	0.17775	0.0251746	0.003	0.0416334	0.003	0.003	0.59745	0.003	0.003	0.003	0.003	0.003	0.0588793	0.121629	0.003
OR7M1P	OR7M1P	1	chr10:135294724-135295274	olfactory receptor, family 7, subfamily M, member 1 pseudogene	2.49192	0.0875244	0.585524	0.0795279	0.204363	0.003		0.003	0.418014	0.0526249	0.275036	0.003	0.003	0.003	0.299738	0.003	0.003	0.003	0.28395	0.003	0.041027	0.003	0.003
OR6L1P	OR6L1P	1	chr10:135388656-135389569	olfactory receptor, family 6, subfamily L, member 1 pseudogene	0.39407	0.00761286	0.003	0.003	0.003	0.003	0.0810834	0.003	0.003	0.0768058	0.003	0.003	0.003	0.003	0.003	0.003	0.003	0.003	0.003	0.003	0.003	0.003	0.003
OR7E110P	OR7E110P	1	chr10:15028874-15029470	olfactory receptor, family 7, subfamily E, member 110 pseudogene	11.7873	0.003	0.103238	0.003	0.003	0.0322092	0.003	0.003	0.003	0.003	0.003	0.003	0.003	0.003	0.003	0.003	0.003	0.003	0.003	0.003	0.003	0.003	0.003
OR7E26P	OR7E26P	1	chr10:15041101-15042084	olfactory receptor, family 7, subfamily E, member 26 pseudogene	1.88486	0.0249186	0.003	0.0369525	0.114283	0.0336368	0.0247065	0.003	0.003	0.0698856	0.003	0.003	0.003	0.0591372	0.003	0.003	0.003	0.003	0.0538692	0.003	0.14529	0.0375162	0.003
OR7E115P	OR7E115P	1	chr10:15049870-15050878	olfactory receptor, family 7, subfamily E, member 115 pseudogene	9.80644	0.0123531	0.200404	0.1613	0.0739098	0.0489444	0.003	0.003	0.003	0.0677069	0.00536151	0.003	0.003	0.003	0.003	0.003	0.003	0.0182004	0.003	0.003	0.0703802	0.003	0.003
OR6D1P	OR6D1P	1	chr10:45753755-45754568	olfactory receptor, family 6, subfamily D, member 1 pseudogene	222.035	0.00467627	0.728605	1.94164	1.39779	0.0851463	0.003	0.003	0.003	0.0298203	0.003	0.003	0.003	0.003	0.003	0.003	0.003	0.003	0.003	0.003	0.003	0.003	0.003
OR2AL1P	OR2AL1P	1	chr11:105064816-105065663	olfactory receptor, family 2, subfamily AL, member 1 pseudogene	1	0.003	0.003	0.003	0.003	0.003	0.003	0.003	0.003	0.003	0.003	0.003	0.003	0.003	0.003	0.003	0.003	0.003	0.003	0.003	0.003	0.003	0.003
OR6M2P	OR6M2P	1	chr11:123711665-123712611	olfactory receptor, family 6, subfamily M, member 2 pseudogene	45.4694	0.003	0.271536	0.0968099	0.159663	0.0176236	0.003	0.003	0.003	0.003	0.003	0.003	0.003	0.003	0.003	0.003	0.003	0.003	0.003	0.003	0.003	0.003	0.003
OR6M3P	OR6M3P	1	chr11:123732388-123733231	olfactory receptor, family 6, subfamily M, member 3 pseudogene	0.518532	0.00578556	0.003	0.003	0.003	0.003	0.003	0.003	0.003	0.0284157	0.003	0.003	0.003	0.003	0.003	0.003	0.003	0.003	0.003	0.003	0.0221533	0.003	0.003
OR10G5P	OR10G5P	1	chr11:123880375-123881185	olfactory receptor, family 10, subfamily G, member 5 pseudogene	1	0.003	0.003	0.003	0.003	0.003	0.003	0.003	0.003	0.003	0.003	0.003	0.003	0.003	0.003	0.003	0.003	0.003	0.003	0.003	0.003	0.003	0.003
OR10D5P	OR10D5P	1	chr11:123925499-123926433	olfactory receptor, family 10, subfamily D, member 5 pseudogene	46.6835	0.003	0.165613	0.373688	0.003	0.0179015	0.003	0.003	0.003	0.003	0.003	0.003	0.003	0.003	0.003	0.003	0.003	0.003	0.003	0.003	0.003	0.003	0.003
OR10D4P	OR10D4P	1	chr11:123964305-123965239	olfactory receptor, family 10, subfamily D, member 4 pseudogene	6.0751	0.00902834	0.003	0.137674	0.0608166	0.0179015	0.003	0.003	0.003	0.0994534	0.003	0.003	0.003	0.003	0.003	0.003	0.003	0.003	0.003	0.003	0.003	0.003	0.003
OR10N1P	OR10N1P	1	chr11:123975758-123976681	olfactory receptor, family 10, subfamily N, member 1 pseudogene	522.393	0.003	2.29818	1.65641	1.46041	0.853712	0.003	0.003	0.003	0.003	0.003	0.003	0.003	0.003	0.003	0.003	0.003	0.003	0.003	0.003	0.003	0.003	0.003
OR10D1P	OR10D1P	1	chr11:124029127-124030060	olfactory receptor, family 10, subfamily D, member 1 pseudogene	13.2233	0.0142745	0.165841	0.334793	0.18269	0.0717002	0.003	0.003	0.0659226	0.003	0.003	0.003	0.003	0.003	0.003	0.003	0.003	0.120469	0.003	0.003	0.003	0.003	0.003
OR8F1P	OR8F1P	1	chr11:124077889-124078852	olfactory receptor, family 8, subfamily F, member 1 pseudogene	1	0.003	0.003	0.003	0.003	0.003	0.003	0.003	0.003	0.003	0.003	0.003	0.003	0.003	0.003	0.003	0.003	0.003	0.003	0.003	0.003	0.003	0.003
OR8G3P	OR8G3P	1	chr11:124085455-124086391	olfactory receptor, family 8, subfamily G, member 3 pseudogene	58.1165	0.00885333	0.165158	1.53006	0.202191	0.160691	0.003	0.003	0.003	0.003	0.003	0.003	0.003	0.003	0.003	0.003	0.003	0.003	0.003	0.003	0.0966533	0.003	0.003
OR8G2P	OR8G2P	1	chr11:124095436-124096383		143.133	0.003	0.650806	0.696129	0.159457	0.211209		0.003	0.003	0.003	0.003	0.003	0.003	0.003	0.003	0.003	0.003	0.003	0.003	0.003	0.003	0.003	0.003
OR8G7P	OR8G7P	1	chr11:124109121-124110318	olfactory receptor, family 8, subfamily G, member 7 pseudogene	21.9414	0.00459239	0.243186	0.131494	0.0150699	0.0133033	0.003	0.003	0.003	0.003	0.003	0.003	0.003	0.003	0.003	0.003	0.003	0.003	0.003	0.003	0.0284782	0.003	0.003
OR8B7P	OR8B7P	1	chr11:124194738-124195683	olfactory receptor, family 8, subfamily B, member 7 pseudogene	8.77681	0.003	0.003	0.0193871	0.0799346	0.003	0.106744	0.003	0.003	0.003	0.003	0.003	0.003	0.003	0.003	0.003	0.003	0.003	0.003	0.003	0.003	0.003	0.003
OR8B6P	OR8B6P	1	chr11:124208657-124209630	olfactory receptor, family 8, subfamily B, member 6 pseudogene	0.321845	0.00932125	0.003	0.003	0.003	0.003	0.003	0.003	0.10414	0.003	0.003	0.003	0.003	0.003	0.003	0.003	0.003	0.003	0.003	0.003	0.003	0.003	0.003
OR8B5P	OR8B5P	1	chr11:124227446-124228395	olfactory receptor, family 8, subfamily B, member 5 pseudogene	1	0.003	0.003	0.003	0.003	0.003	0.0540556	0.003	0.003	0.003	0.003	0.003	0.003	0.003	0.003	0.003	0.003	0.003	0.003	0.003	0.003	0.003	0.003
OR8B1P	OR8B1P	1	chr11:124235517-124236447	olfactory receptor, family 8, subfamily B, member 1 pseudogene	43.2017	0.003	0.27755	0.217491	0.0203792	0.003	0.003	0.003	0.003	0.003	0.003	0.003	0.003	0.003	0.003	0.003	0.003	0.003	0.003	0.003	0.003	0.003	0.003
OR8C1P	OR8C1P	1	chr11:124246772-124247703	olfactory receptor, family 8, subfamily C, member 1 pseudogene	13.7144	0.003	0.003	0.13822	0.0203523	0.003	0.003	0.003	0.003	0.003	0.003	0.003	0.003	0.003	0.003	0.003	0.003	0.003	0.003	0.003	0.003	0.003	0.003
OR8X1P	OR8X1P	1	chr11:124274128-124274997	olfactory receptor, family 8, subfamily X, member 1 pseudogene	0.440961	0.00680333	0.003	0.003	0.003	0.003	0.003	0.003	0.003	0.003	0.003	0.003	0.003	0.003	0.003	0.003	0.003	0.003	0.003	0.003	0.0638532	0.003	0.003
OR8A2P	OR8A2P	1	chr11:124330459-124331422	olfactory receptor, family 8, subfamily A, member 2 pseudogene	0.688849	0.00952469	0.003	0.003	0.003	0.0172443	0.003	0.107395	0.003	0.003	0.003	0.003	0.003	0.003	0.003	0.003	0.003	0.003	0.003	0.003	0.003	0.003	0.003
OR8B9P	OR8B9P	1	chr11:124350895-124351824	olfactory receptor, family 8, subfamily B, member 9 pseudogene	104.589	0.003	0.0555869	0.732528	0.448935	0.0180199	0.003	0.003	0.003	0.003	0.003	0.003	0.003	0.003	0.003	0.003	0.003	0.003	0.003	0.003	0.003	0.003	0.003
OR8B10P	OR8B10P	1	chr11:124386205-124387138	olfactory receptor, family 8, subfamily B, member 10 pseudogene	23.7786	0.003	0.003	0.15755	0.121793	0.003	0.003	0.003	0.003	0.003	0.003	0.003	0.003	0.003	0.003	0.003	0.003	0.003	0.003	0.003	0.003	0.003	0.003
OR8A3P	OR8A3P	1	chr11:124401501-124401880	olfactory receptor, family 8, subfamily A, member 3 pseudogene	1	0.003	0.003	0.003	0.003	0.003		0.003	0.003	0.003	0.003	0.003	0.003	0.003	0.003	0.003	0.003	0.003	0.003	0.003	0.003	0.003	0.003
OR8Q1P	OR8Q1P	1	chr11:124471497-124472154	olfactory receptor, family 8, subfamily Q, member 1 pseudogene	1	0.003	0.003	0.003	0.003	0.003	0.003	0.003	0.003	0.003	0.003	0.003	0.003	0.003	0.003	0.003	0.003	0.003	0.003	0.003	0.003	0.003	0.003
OR7E41P	OR7E41P	1	chr11:15009253-15010187	olfactory receptor, family 7, subfamily E, member 41 pseudogene	1	0.003	0.003	0.003	0.003	0.003	0.003	0.003	0.003	0.003	0.003	0.003	0.003	0.003	0.003	0.003	0.003	0.003	0.003	0.003	0.003	0.003	0.003
OR7E14P	OR7E14P	1	chr11:17073547-17074531	olfactory receptor, family 7, subfamily E, member 14 pseudogene	2.36235	1.15487	2.68577	2.47276	2.37796	3.37633	6.7085	0.982263	0.308004	0.209387	0.324246	0.73104	0.277747	4.60677	3.90913	1.08512	1.40626	0.281428	1.79333	0.003	1.99517	0.56202	0.003
OR2BH1P	OR2BH1P	1	chr11:29008181-29009045	olfactory receptor, family 2, subfamily BH, member 1 pseudogene	1	0.003	0.003	0.003	0.003	0.003		0.003	0.003	0.003	0.003	0.003	0.003	0.003	0.003	0.003	0.003	0.003	0.003	0.003	0.003	0.003	0.003
OR7E12P	OR7E12P	1	chr11:3412039-3412979	olfactory receptor, family 7, subfamily E, member 12 pseudogene	1.85448	0.193233	0.793906	0.253678	0.261479	0.12433	0.23012	0.354435	0.968525	0.0246601	0.467556	0.212409	0.0360988	0.172156	0.0265308	0.206569	0.122144	0.444799	0.0192965	0.003	0.0275563	0.003	0.003
OR7E117P	OR7E117P	1	chr11:3620873-3621899	olfactory receptor, family 7, subfamily E, member 117 pseudogene	2.21196	0.003	0.003	0.0175435	0.003	0.003	0.0209915	0.003	0.003	0.003	0.003	0.003	0.003	0.003	0.003	0.003	0.003	0.003	0.003	0.003	0.003	0.003	0.003
OR55B1P	OR55B1P	1	chr11:4167545-4168525	olfactory receptor, family 55, subfamily B, member 1 pseudogene	52.1715	0.007319	0.259585	0.760346	0.152943	0.3545	0.003	0.003	0.003	0.003	0.003	0.003	0.003	0.003	0.003	0.003	0.003	0.003	0.072104	0.003	0.003	0.003	0.003
OR52B3P	OR52B3P	1	chr11:4399511-4400454	olfactory receptor, family 52, subfamily B, member 3 pseudogene	0.555916	0.100591	0.0545288	0.0583126	0.040071	0.0707689	0.0527029	0.066186	0.043352	0.0491194	0.106964	0.243699	0.003	0.003	0.003	0.394998	0.185563	0.158446	0.132518	0.003	0.210617	0.003	0.003
OR51R1P	OR51R1P	1	chr11:4439289-4440238	olfactory receptor, family 51, subfamily R, member 1 pseudogene	5.57175	0.003	0.003	0.057861	0.003	0.003	0.003	0.003	0.003	0.003	0.003	0.003	0.003	0.003	0.003	0.003	0.003	0.003	0.003	0.003	0.003	0.003	0.003
OR52P2P	OR52P2P	1	chr11:4452562-4453459	olfactory receptor, family 52, subfamily P, member 2 pseudogene	7.17132	0.00535891	0.003	0.144722	0.003	0.003	0.003	0.003	0.003	0.003	0.003	0.003	0.003	0.003	0.003	0.003	0.003	0.003	0.003	0.003	0.003	0.003	0.0407426
OR52K3P	OR52K3P	1	chr11:4496038-4496985	olfactory receptor, family 52, subfamily K, member 3 pseudogene	0.859178	0.341235	0.488105	0.464086	0.0797283	0.140806	0.003	0.003	0.003	0.0244271	0.003	0.003	0.0416596	0.003	0.003	0.17679	0.003	0.0787953	0.112973	0.003	0.003	0.0590086	4.9391
OR52M2P	OR52M2P	1	chr11:4536174-4537154	olfactory receptor, family 52, subfamily M, member 2 pseudogene	1	0.003	0.003	0.003	0.003	0.003	0.0505308	0.003	0.003	0.003	0.003	0.003	0.003	0.003	0.003	0.003	0.003	0.003	0.003	0.003	0.003	0.003	0.003
OR51A9P	OR51A9P	1	chr11:4682061-4682960	olfactory receptor, family 51, subfamily A, member 9 pseudogene	0.526865	0.00569406	0.003	0.003	0.003	0.003	0.003	0.003	0.0461049	0.003	0.003	0.003	0.003	0.003	0.003	0.003	0.003	0.003	0.003	0.003	0.003	0.003	0.003
OR51C1P	OR51C1P	1	chr11:4711990-4712932	olfactory receptor, family 51, subfamily C, member 1 pseudogene	9.40995	0.0276933	0.109206	0.739588	0.140431	0.0531457	0.003	0.003	0.003	0.003	0.003	0.003	0.003	0.003	0.003	0.003	0.003	0.003	0.398093	0.003	0.003	0.003	0.003
OR51F5P	OR51F5P	1	chr11:4730798-4731740	olfactory receptor, family 51, subfamily F, member 5 pseudogene	86.906	0.003	0.109206	0.875828	0.0401231	0.0177152	0.003	0.003	0.003	0.003	0.003	0.003	0.003	0.003	0.003	0.003	0.003	0.003	0.003	0.003	0.003	0.003	0.003
OR51C4P	OR51C4P	1	chr11:4739841-4740789	olfactory receptor, family 51, subfamily C, member 4 pseudogene	6.79282	0.003	0.003	0.0579358	0.003	0.0175781		0.003	0.003	0.003	0.003	0.003	0.003	0.003	0.003	0.003	0.003	0.003	0.003	0.003	0.003	0.003	0.003
OR51F3P	OR51F3P	1	chr11:4757407-4758308	olfactory receptor, family 51, subfamily F, member 3 pseudogene	4.1768	0.003	0.003	0.0411216	0.003	0.003		0.003	0.003	0.003	0.003	0.003	0.003	0.003	0.003	0.003	0.003	0.003	0.003	0.003	0.003	0.003	0.003
OR51F4P	OR51F4P	1	chr11:4773275-4774174	olfactory receptor, family 51, subfamily F, member 4 pseudogene	1	0.003	0.003	0.003	0.003	0.003		0.003	0.003	0.003	0.003	0.003	0.003	0.003	0.003	0.003	0.003	0.003	0.003	0.003	0.003	0.003	0.003
OR51N1P	OR51N1P	1	chr11:4807983-4808932	olfactory receptor, family 51, subfamily N, member 1 pseudogene	5.17745	0.003	0.003	0.038574	0.003	0.0175554	0.0509994	0.003	0.003	0.003	0.003	0.003	0.003	0.003	0.003	0.003	0.003	0.003	0.003	0.003	0.003	0.003	0.003
OR52Y1P	OR52Y1P	1	chr11:4814998-4815492	olfactory receptor, family 52, subfamily Y, member 1 pseudogene	12.4165	0.003	0.139998	0.003	0.003	0.003	0.003	0.003	0.003	0.003	0.003	0.003	0.003	0.003	0.003	0.003	0.003	0.003	0.003	0.003	0.003	0.003	0.003
OR4B2P	OR4B2P	1	chr11:48248980-48249883	olfactory receptor, family 4, subfamily B, member 2 pseudogene	1	0.003	0.003	0.003	0.003	0.003	0.003	0.003	0.003	0.003	0.003	0.003	0.003	0.003	0.003	0.003	0.003	0.003	0.003	0.003	0.003	0.003	0.003
OR4C4P	OR4C4P	1	chr11:48366902-48374008	olfactory receptor, family 4, subfamily C, member 4 pseudogene	0.748775	0.00413715	0.00339117	0.003	0.003	0.003	0.003	0.003	0.00682926	0.003	0.003	0.00650677	0.0106243	0.003	0.003	0.003	0.003	0.003	0.00623401	0.003	0.003	0.003	0.003
OR4C2P	OR4C2P	1	chr11:48441795-48442723	olfactory receptor, family 4, subfamily C, member 2 pseudogene	1	0.003	0.003	0.003	0.003	0.003	0.003	0.003	0.003	0.003	0.003	0.003	0.003	0.003	0.003	0.003	0.003	0.003	0.003	0.003	0.003	0.003	0.003
OR4C10P	OR4C10P	1	chr11:48453771-48454725	olfactory receptor, family 4, subfamily C, member 10 pseudogene	1	0.003	0.003	0.003	0.003	0.003	0.003	0.003	0.003	0.003	0.003	0.003	0.003	0.003	0.003	0.003	0.003	0.003	0.003	0.003	0.003	0.003	0.003
OR4C9P	OR4C9P	1	chr11:48485616-48486572	olfactory receptor, family 4, subfamily C, member 9 pseudogene	2.39193	0.003	0.003	0.003	0.0197032	0.003	0.003	0.003	0.003	0.003	0.003	0.003	0.003	0.003	0.003	0.003	0.003	0.003	0.003	0.003	0.003	0.003	0.003
OR4R1P	OR4R1P	1	chr11:48507737-48508583	olfactory receptor, family 4, subfamily R, member 1 pseudogene	1	0.003	0.003	0.003	0.003	0.003	0.003	0.003	0.003	0.003	0.003	0.003	0.003	0.003	0.003	0.003	0.003	0.003	0.003	0.003	0.003	0.003	0.003
OR4A48P	OR4A48P	1	chr11:48513272-48514046	olfactory receptor, family 4, subfamily A, member 48 pseudogene	1	0.003	0.003	0.003	0.003	0.003	0.003	0.003	0.003	0.003	0.003	0.003	0.003	0.003	0.003	0.003	0.003	0.003	0.003	0.003	0.003	0.003	0.003
OR4A46P	OR4A46P	1	chr11:48517869-48518810	olfactory receptor, family 4, subfamily A, member 46 pseudogene	1	0.003	0.003	0.003	0.003	0.003	0.003	0.003	0.003	0.003	0.003	0.003	0.003	0.003	0.003	0.003	0.003	0.003	0.003	0.003	0.003	0.003	0.003
OR51A8P	OR51A8P	1	chr11:4853362-4854299	olfactory receptor, family 51, subfamily A, member 8 pseudogene	32.3614	0.00401901	0.109955	0.293856	0.0807707	0.0356624	0.003	0.003	0.003	0.003	0.003	0.003	0.003	0.003	0.003	0.003	0.003	0.003	0.003	0.003	0.0193042	0.003	0.003
OR4A40P	OR4A40P	1	chr11:48533871-48534815	olfactory receptor, family 4, subfamily A, member 40 pseudogene	1.06882	0.0114658	0.003	0.003	0.0400191	0.003	0.003	0.003	0.003	0.003	0.003	0.003	0.003	0.003	0.003	0.003	0.003	0.138452	0.003	0.003	0.003	0.003	0.003
OR4A43P	OR4A43P	1	chr11:48547615-48548526	olfactory receptor, family 4, subfamily A, member 43 pseudogene	1	0.003	0.003	0.003	0.003	0.003	0.003	0.003	0.003	0.003	0.003	0.003	0.003	0.003	0.003	0.003	0.003	0.003	0.003	0.003	0.003	0.003	0.003
OR4A45P	OR4A45P	1	chr11:48600987-48601903	olfactory receptor, family 4, subfamily A, member 45 pseudogene	1	0.003	0.003	0.003	0.003	0.003	0.003	0.003	0.003	0.003	0.003	0.003	0.003	0.003	0.003	0.003	0.003	0.003	0.003	0.003	0.003	0.003	0.003
OR4A41P	OR4A41P	1	chr11:48611290-48612242	olfactory receptor, family 4, subfamily A, member 41 pseudogene	0.462872	0.00648127	0.003	0.003	0.003	0.003	0.003	0.003	0.003	0.003	0.003	0.003	0.003	0.003	0.003	0.003	0.003	0.0587003	0.003	0.003	0.003	0.003	0.003
OR4A42P	OR4A42P	1	chr11:48631614-48632548	olfactory receptor, family 4, subfamily A, member 42 pseudogene	1	0.003	0.003	0.003	0.003	0.003	0.003	0.003	0.003	0.003	0.003	0.003	0.003	0.003	0.003	0.003	0.003	0.003	0.003	0.003	0.003	0.003	0.003
OR4A44P	OR4A44P	1	chr11:48649031-48650012	olfactory receptor, family 4, subfamily A, member 44 pseudogene	1	0.003	0.003	0.003	0.003	0.003	0.003	0.003	0.003	0.003	0.003	0.003	0.003	0.003	0.003	0.003	0.003	0.003	0.003	0.003	0.003	0.003	0.003
OR51H1P	OR51H1P	1	chr11:4880849-4881794	olfactory receptor, family 51, subfamily H, member 1 pseudogene	8.44586	0.00758631	0.003	0.232645	0.003	0.0176464	0.003	0.003	0.003	0.003	0.003	0.003	0.003	0.003	0.003	0.003	0.003	0.003	0.003	0.003	0.0763809	0.003	0.003
OR51H2P	OR51H2P	1	chr11:4897786-4898733	olfactory receptor, family 51, subfamily H, member 2 pseudogene	18.1177	0.00869653	0.216935	0.212706	0.0597962	0.140806	0.003	0.003	0.003	0.003	0.003	0.003	0.003	0.003	0.003	0.003	0.003	0.003	0.0941444	0.003	0.003	0.003	0.003
OR51A6P	OR51A6P	1	chr11:4910807-4911826	olfactory receptor, family 51, subfamily A, member 6 pseudogene	6.05982	0.003	0.003	0.0353778	0.0182374	0.0161027	0.003	0.003	0.003	0.003	0.003	0.003	0.003	0.003	0.003	0.003	0.003	0.003	0.003	0.003	0.003	0.003	0.003
OR51A3P	OR51A3P	1	chr11:4958585-4959524	olfactory receptor, family 51, subfamily A, member 3 pseudogene	7.06313	0.003	0.003	0.0586176	0.02014	0.003	0.003	0.003	0.003	0.003	0.003	0.003	0.003	0.003	0.003	0.003	0.003	0.003	0.003	0.003	0.003	0.003	0.003
OR4A1P	OR4A1P	1	chr11:49919815-49920738	olfactory receptor, family 4, subfamily A, member 1 pseudogene	0.294321	0.0101929	0.003	0.003	0.003	0.003	0.003	0.003	0.003	0.003	0.003	0.003	0.003	0.003	0.003	0.003	0.003	0.003	0.003	0.003	0.118087	0.003	0.003
OR4A49P	OR4A49P	1	chr11:49936663-49937095	olfactory receptor, family 4, subfamily A, member 49 pseudogene	1	0.003	0.003	0.003	0.003	0.003	0.0894592	0.003	0.003	0.003	0.003	0.003	0.003	0.003	0.003	0.003	0.003	0.003	0.003	0.003	0.003	0.003	0.003
OR4A18P	OR4A18P	1	chr11:49939041-49939929	olfactory receptor, family 4, subfamily A, member 18 pseudogene	1	0.003	0.003	0.003	0.003	0.003	0.003	0.003	0.003	0.003	0.003	0.003	0.003	0.003	0.003	0.003	0.003	0.003	0.003	0.003	0.003	0.003	0.003
OR51A5P	OR51A5P	1	chr11:4994175-4995114	olfactory receptor, family 51, subfamily A, member 5 pseudogene	8.6914	0.003	0.003	0.0781568	0.02014	0.003	0.003	0.003	0.003	0.003	0.003	0.003	0.003	0.003	0.003	0.003	0.003	0.003	0.003	0.003	0.003	0.003	0.003
OR4A19P	OR4A19P	1	chr11:49941962-49942865	olfactory receptor, family 4, subfamily A, member 19 pseudogene	1	0.003	0.003	0.003	0.003	0.003	0.003	0.003	0.003	0.003	0.003	0.003	0.003	0.003	0.003	0.003	0.003	0.003	0.003	0.003	0.003	0.003	0.003
OR4R3P	OR4R3P	1	chr11:49944601-49945439	olfactory receptor, family 4, subfamily R, member 3 pseudogene	1	0.003	0.003	0.003	0.003	0.003	0.003	0.003	0.003	0.003	0.003	0.003	0.003	0.003	0.003	0.003	0.003	0.003	0.003	0.003	0.003	0.003	0.003
OR51P1P	OR51P1P	1	chr11:5036367-5037306	olfactory receptor, family 51, subfamily P, member 1 pseudogene	2.37827	0.003	0.003	0.0195392	0.003	0.003	0.003	0.003	0.003	0.003	0.003	0.003	0.003	0.003	0.003	0.003	0.003	0.003	0.003	0.003	0.003	0.003	0.003
OR52J2P	OR52J2P	1	chr11:5058242-5059178	olfactory receptor, family 52, subfamily J, member 2 pseudogene	5.25724	0.003	0.003	0.0392323	0.003	0.0178546	0.003	0.003	0.003	0.003	0.003	0.003	0.003	0.003	0.003	0.003	0.003	0.003	0.003	0.003	0.003	0.003	0.003
OR52E1P	OR52E1P	1	chr11:5090801-5091724		14.0545	0.003	0.003	0.159654	0.003	0.003		0.003	0.003	0.003	0.003	0.003	0.003	0.003	0.003	0.003	0.003	0.003	0.003	0.003	0.003	0.003	0.003
OR52S1P	OR52S1P	1	chr11:5097323-5098296	olfactory receptor, family 52, subfamily S, member 1 pseudogene	20.3018	0.003	0.0523917	0.14966	0.03857	0.003	0.003	0.003	0.003	0.003	0.003	0.003	0.003	0.003	0.003	0.003	0.003	0.003	0.003	0.003	0.003	0.003	0.003
OR52E3P	OR52E3P	1	chr11:5113905-5114838	olfactory receptor, family 52, subfamily E, member 3 pseudogene	15.3711	0.003	0.003	0.137856	0.0405977	0.003	0.003	0.003	0.003	0.003	0.003	0.003	0.003	0.003	0.003	0.003	0.003	0.003	0.003	0.003	0.003	0.003	0.003
OR52J1P	OR52J1P	1	chr11:5125382-5126311	olfactory receptor, family 52, subfamily J, member 1 pseudogene	2.39984	0.003	0.003	0.0197981	0.003	0.003	0.003	0.003	0.003	0.003	0.003	0.003	0.003	0.003	0.003	0.003	0.003	0.003	0.003	0.003	0.003	0.003	0.003
OR4A6P	OR4A6P	1	chr11:51393462-51394432	olfactory receptor, family 4, subfamily A, member 6 pseudogene	1	0.003	0.003	0.003	0.003	0.003	0.003	0.003	0.003	0.003	0.003	0.003	0.003	0.003	0.003	0.003	0.003	0.003	0.003	0.003	0.003	0.003	0.003
OR4A7P	OR4A7P	1	chr11:51425919-51426829	olfactory receptor, family 4, subfamily A, member 7 pseudogene	1	0.003	0.003	0.003	0.003	0.003	0.003	0.003	0.003	0.003	0.003	0.003	0.003	0.003	0.003	0.003	0.003	0.003	0.003	0.003	0.003	0.003	0.003
OR4A8P	OR4A8P	1	chr11:51435458-51436403	olfactory receptor, family 4, subfamily A, member 8 pseudogene	1	0.003	0.003	0.003	0.003	0.003	0.003	0.003	0.003	0.003	0.003	0.003	0.003	0.003	0.003	0.003	0.003	0.003	0.003	0.003	0.003	0.003	0.003
OR4A2P	OR4A2P	1	chr11:51451068-51451981	olfactory receptor, family 4, subfamily A, member 2 pseudogene	1	0.003	0.003	0.003	0.003	0.003	0.003	0.003	0.003	0.003	0.003	0.003	0.003	0.003	0.003	0.003	0.003	0.003	0.003	0.003	0.003	0.003	0.003
OR4A3P	OR4A3P	1	chr11:51455828-51456699	olfactory receptor, family 4, subfamily A, member 3 pseudogene	1	0.003	0.003	0.003	0.003	0.003	0.003	0.003	0.003	0.003	0.003	0.003	0.003	0.003	0.003	0.003	0.003	0.003	0.003	0.003	0.003	0.003	0.003
OR4A4P	OR4A4P	1	chr11:51458686-51459613	olfactory receptor, family 4, subfamily A, member 4 pseudogene	1	0.003	0.003	0.003	0.003	0.003	0.003	0.003	0.003	0.003	0.003	0.003	0.003	0.003	0.003	0.003	0.003	0.003	0.003	0.003	0.003	0.003	0.003
OR4R2P	OR4R2P	1	chr11:51461325-51462182	olfactory receptor, family 4, subfamily R, member 2 pseudogene	1	0.003	0.003	0.003	0.003	0.003	0.003	0.003	0.003	0.003	0.003	0.003	0.003	0.003	0.003	0.003	0.003	0.003	0.003	0.003	0.003	0.003	0.003
OR4C7P	OR4C7P	1	chr11:51483283-51484251	olfactory receptor, family 4, subfamily C, member 7 pseudogene	1	0.003	0.003	0.003	0.003	0.003	0.003	0.003	0.003	0.003	0.003	0.003	0.003	0.003	0.003	0.003	0.003	0.003	0.003	0.003	0.003	0.003	0.003
OR4C50P	OR4C50P	1	chr11:51526873-51527800	olfactory receptor, family 4, subfamily C, member 50 pseudogene	1	0.003	0.003	0.003	0.003	0.003	0.003	0.003	0.003	0.003	0.003	0.003	0.003	0.003	0.003	0.003	0.003	0.003	0.003	0.003	0.003	0.003	0.003
OR51A1P	OR51A1P	1	chr11:5191583-5192453	olfactory receptor, family 51, subfamily A, member 1 pseudogene	2.83474	0.0135259	0.003	0.0644305	0.066394	0.0195455	0.003	0.171415	0.003	0.003	0.003	0.003	0.003	0.003	0.003	0.003	0.003	0.003	0.003	0.003	0.003	0.003	0.003
OR52Z1P	OR52Z1P	1	chr11:5198949-5199840		4.42087	0.00941856	0.0586775	0.0833905	0.0214848	0.003		0.003	0.003	0.105697	0.003	0.003	0.003	0.003	0.003	0.003	0.003	0.003	0.003	0.003	0.003	0.003	0.003
OR51AB1P	OR51AB1P	1	chr11:5312696-5313581	olfactory receptor, family 51, subfamily AB, member 1 pseudogene	3.05962	0.00538736	0.003	0.003	0.0216657	0.0382674	0.003	0.003	0.003	0.003	0.003	0.003	0.022732	0.003	0.003	0.003	0.003	0.003	0.003	0.003	0.003	0.0214658	0.003
OR51B3P	OR51B3P	1	chr11:5335974-5336923	olfactory receptor, family 51, subfamily B, member 3 pseudogene	1	0.003	0.003	0.003	0.003	0.003	0.003	0.003	0.003	0.003	0.003	0.003	0.003	0.003	0.003	0.003	0.003	0.003	0.003	0.003	0.003	0.003	0.003
OR51B8P	OR51B8P	1	chr11:5351817-5352575	olfactory receptor, family 51, subfamily B, member 8 pseudogene	1	0.003	0.003	0.003	0.003	0.003	0.003	0.003	0.003	0.003	0.003	0.003	0.003	0.003	0.003	0.003	0.003	0.003	0.003	0.003	0.003	0.003	0.003
OR51K1P	OR51K1P	1	chr11:5451885-5452832	olfactory receptor, family 51, subfamily K, member 1 pseudogene	7.70154	0.0106185	0.003	0.25138	0.0199321	0.0528024	0.003	0.003	0.086236	0.003	0.003	0.003	0.0416596	0.003	0.003	0.003	0.003	0.003	0.003	0.003	0.003	0.003	0.003
OR51A10P	OR51A10P	1	chr11:5489733-5490589	olfactory receptor, family 51, subfamily A, member 10 pseudogene	6.06146	0.00706064	0.123689	0.0219178	0.0225844	0.003	0.003	0.003	0.003	0.003	0.0485133	0.003	0.003	0.003	0.003	0.003	0.003	0.022457	0.003	0.003	0.003	0.003	0.003
OR4A11P	OR4A11P	1	chr11:55086035-55086953	olfactory receptor, family 4, subfamily A, member 11 pseudogene	15.5575	0.003	0.0564476	0.003	0.124242	0.003	0.003	0.003	0.003	0.003	0.003	0.003	0.003	0.003	0.003	0.003	0.003	0.003	0.003	0.003	0.003	0.003	0.003
OR4A12P	OR4A12P	1	chr11:55093231-55094176	olfactory receptor, family 4, subfamily A, member 12 pseudogene	1	0.003	0.003	0.003	0.003	0.003	0.003	0.003	0.003	0.003	0.003	0.003	0.003	0.003	0.003	0.003	0.003	0.003	0.003	0.003	0.003	0.003	0.003
OR4A9P	OR4A9P	1	chr11:55156004-55156948	olfactory receptor, family 4, subfamily A, member 9 pseudogene	1	0.003	0.003	0.003	0.003	0.003	0.003	0.003	0.003	0.003	0.003	0.003	0.003	0.003	0.003	0.003	0.003	0.003	0.003	0.003	0.003	0.003	0.003
OR4A10P	OR4A10P	1	chr11:55199432-55199843	olfactory receptor, family 4, subfamily A, member 10 pseudogene	6.13358	0.003	0.003	0.003	0.064603	0.003	0.003	0.003	0.003	0.003	0.003	0.003	0.003	0.003	0.003	0.003	0.003	0.003	0.003	0.003	0.003	0.003	0.003
OR4A17P	OR4A17P	1	chr11:55211910-55212814	olfactory receptor, family 4, subfamily A, member 17 pseudogene	1	0.003	0.003	0.003	0.003	0.003	0.003	0.003	0.003	0.003	0.003	0.003	0.003	0.003	0.003	0.003	0.003	0.003	0.003	0.003	0.003	0.003	0.003
OR4A13P	OR4A13P	1	chr11:55234246-55235188	olfactory receptor, family 4, subfamily A, member 13 pseudogene	0.689724	0.00434957	0.003	0.003	0.003	0.003	0.003	0.003	0.003	0.0245931	0.003	0.003	0.003	0.003	0.003	0.003	0.003	0.003	0.003	0.003	0.003	0.003	0.003
OR4A50P	OR4A50P	1	chr11:55243418-55243904	olfactory receptor, family 4, subfamily A, member 50 pseudogene	4.85002	0.003	0.003	0.003	0.0492003	0.003	0.003	0.003	0.003	0.003	0.003	0.003	0.003	0.003	0.003	0.003	0.003	0.003	0.003	0.003	0.003	0.003	0.003
OR4A14P	OR4A14P	1	chr11:55245026-55245985	olfactory receptor, family 4, subfamily A, member 14 pseudogene	1.42196	0.00503323	0.003	0.003	0.0196281	0.003	0.003	0.003	0.00515231	0.003	0.003	0.003	0.003	0.0135605	0.0228188	0.003	0.003	0.003	0.003	0.003	0.003	0.003	0.003
OR4A21P	OR4A21P	1	chr11:55258631-55259621	olfactory receptor, family 4, subfamily A, member 21 pseudogene	17.716	0.003	0.003	0.0366354	0.169957	0.003	0.003	0.003	0.003	0.003	0.003	0.003	0.003	0.003	0.003	0.003	0.003	0.003	0.003	0.003	0.003	0.003	0.003
OR4C1P	OR4C1P	1	chr11:55277204-55278138	olfactory receptor, family 4, subfamily C, member 1 pseudogene	15.9542	0.003	0.003	0.003	0.18245	0.003	0.003	0.003	0.003	0.003	0.003	0.003	0.003	0.003	0.003	0.003	0.003	0.003	0.003	0.003	0.003	0.003	0.003
OR4C14P	OR4C14P	1	chr11:55304477-55305400	olfactory receptor, family 4, subfamily C, member 14 pseudogene	1	0.003	0.003	0.003	0.003	0.003		0.003	0.003	0.003	0.003	0.003	0.003	0.003	0.003	0.003	0.003	0.003	0.003	0.003	0.003	0.003	0.003
OR4V1P	OR4V1P	1	chr11:55441067-55442031	olfactory receptor, family 4, subfamily V, member 1 pseudogene	2.32672	0.003	0.003	0.0189207	0.003	0.003	0.003	0.003	0.003	0.003	0.003	0.003	0.003	0.003	0.003	0.003	0.003	0.003	0.003	0.003	0.003	0.003	0.003
OR4P1P	OR4P1P	1	chr11:55450818-55451745	olfactory receptor, family 4, subfamily P, member 1 pseudogene	1	0.003	0.003	0.003	0.003	0.003	0.003	0.003	0.003	0.003	0.003	0.003	0.003	0.003	0.003	0.003	0.003	0.003	0.003	0.003	0.003	0.003	0.003
OR5D2P	OR5D2P	1	chr11:55482256-55483194	olfactory receptor, family 5, subfamily D, member 2 pseudogene	4.0108	0.003	0.003	0.0391296	0.003	0.003	0.003	0.003	0.003	0.003	0.003	0.003	0.003	0.003	0.003	0.003	0.003	0.003	0.003	0.003	0.003	0.003	0.003
OR52V1P	OR52V1P	1	chr11:5548452-5549356	olfactory receptor, family 52, subfamily V, member 1 pseudogene	0.835304	0.025236	0.003	0.0204763	0.0422064	0.0186363	0.003	0.003	0.003	0.003	0.003	0.003	0.0442263	0.003	0.003	0.003	0.174162	0.146388	0.003	0.003	0.003	0.003	0.003
OR5D3P	OR5D3P	1	chr11:55493674-55494631	olfactory receptor, family 5, subfamily D, member 3 pseudogene	287.281	0.00516126	0.374571	2.36715	1.41682	1.77238	0.003	0.003	0.003	0.003	0.003	0.003	0.003	0.003	0.003	0.003	0.003	0.003	0.003	0.003	0.0375801	0.003	0.003
OR5D17P	OR5D17P	1	chr11:55522452-55523430	olfactory receptor, family 5, subfamily D, member 17 pseudogene	26.8972	0.003	0.104103	0.148729	0.0191653	0.0507687	0.003	0.003	0.003	0.003	0.003	0.003	0.003	0.003	0.003	0.003	0.003	0.003	0.003	0.003	0.003	0.003	0.003
OR5D15P	OR5D15P	1	chr11:55554440-55555382	olfactory receptor, family 5, subfamily D, member 15 pseudogene	27.6566	0.003	0.0546031	0.214091	0.0601846	0.003	0.003	0.003	0.003	0.003	0.003	0.003	0.003	0.003	0.003	0.003	0.003	0.003	0.003	0.003	0.003	0.003	0.003
OR9M1P	OR9M1P	1	chr11:55623067-55623997	olfactory receptor, family 9, subfamily M, member 1, pseudogene	143.53	0.003	0.77714	0.375666	0.407584	0.161965	0.003	0.003	0.003	0.003	0.003	0.003	0.003	0.003	0.003	0.003	0.003	0.003	0.003	0.003	0.003	0.003	0.003
OR5W1P	OR5W1P	1	chr11:55670819-55671622	olfactory receptor, family 5, subfamily W, member 1 pseudogene	12.0736	0.003	0.003	0.0712957	0.0489636	0.0216245	0.003	0.003	0.003	0.003	0.003	0.003	0.003	0.003	0.003	0.003	0.003	0.003	0.003	0.003	0.003	0.003	0.003
OR10AF1P	OR10AF1P	1	chr11:55715594-55716399	olfactory receptor, family 10, subfamily AF, member 1 pseudogene	2.54634	0.003	0.003	0.003	0.003	0.0215561	0.003	0.003	0.003	0.003	0.003	0.003	0.003	0.003	0.003	0.003	0.003	0.003	0.003	0.003	0.003	0.003	0.003
OR10AK1P	OR10AK1P	1	chr11:55724690-55725105	olfactory receptor, family 10, subfamily AK, member 1 pseudogene	32.9643	0.003	0.386572	0.003	0.003	0.003	0.003	0.003	0.003	0.003	0.003	0.003	0.003	0.003	0.003	0.003	0.003	0.003	0.003	0.003	0.003	0.003	0.003
OR52H2P	OR52H2P	1	chr11:5572894-5573826	olfactory receptor, family 52, subfamily H, member 2 pseudogene	1.65568	0.00406912	0.003	0.003	0.003	0.0179487	0.003	0.003	0.003	0.003	0.003	0.003	0.003	0.003	0.003	0.003	0.003	0.0201059	0.003	0.003	0.003	0.003	0.003
OR7E5P	OR7E5P	1	chr11:55746589-55747582	olfactory receptor, family 7, subfamily E, member 5 pseudogene	1.37595	0.00505381	0.003	0.003	0.0188151	0.003	0.003	0.003	0.003	0.003	0.003	0.003	0.003	0.003	0.003	0.003	0.003	0.003	0.003	0.003	0.0358609	0.003	0.003
OR5F2P	OR5F2P	1	chr11:55782492-55783433	olfactory receptor, family 5, subfamily F, member 2 pseudogene	2.42397	0.003	0.003	0.003	0.0200876	0.003	0.003	0.003	0.003	0.003	0.003	0.003	0.003	0.003	0.003	0.003	0.003	0.003	0.003	0.003	0.003	0.003	0.003
OR5AQ1P	OR5AQ1P	1	chr11:55821840-55822776	olfactory receptor, family 5, subfamily AQ, member 1 pseudogene	366.088	0.003	1.76169	0.725797	1.63775	0.267819	0.104239	0.003	0.003	0.003	0.003	0.003	0.003	0.003	0.003	0.003	0.003	0.003	0.003	0.003	0.003	0.003	0.003
OR52B5P	OR52B5P	1	chr11:5582196-5583141	olfactory receptor, family 52, subfamily B, member 5 pseudogene	33.7843	0.0150869	0.271905	1.41526	0.139886	0.211757	0.102149	0.003	0.0216173	0.003	0.003	0.003	0.0208862	0.103631	0.003	0.003	0.003	0.0592564	0.003	0.003	0.003	0.003	0.003
OR5J1P	OR5J1P	1	chr11:55838586-55839522	olfactory receptor, family 5, subfamily J, member 1 pseudogene	4.49361	0.00885333	0.0550528	0.0980807	0.003	0.003	0.003	0.003	0.003	0.003	0.003	0.003	0.003	0.003	0.003	0.003	0.003	0.003	0.003	0.003	0.0966533	0.003	0.003
OR5BE1P	OR5BE1P	1	chr11:55850276-55851212	olfactory receptor, family 5, subfamily BE, member 1 pseudogene	92.0634	0.003	0.275264	0.529636	0.121315	0.178546	0.003	0.003	0.003	0.003	0.003	0.003	0.003	0.003	0.003	0.003	0.003	0.003	0.003	0.003	0.003	0.003	0.003
OR52T1P	OR52T1P	1	chr11:5587880-5588846	olfactory receptor, family 52, subfamily T, member 1 pseudogene	1.18678	0.0138229	0.003	0.0566188	0.003	0.003	0.003	0.003	0.0840798	0.0238163	0.003	0.003	0.003	0.003	0.003	0.003	0.003	0.003	0.003	0.003	0.0742701	0.003	0.003
OR5BN2P	OR5BN2P	1	chr11:55884114-55884732	olfactory receptor, family 5, subfamily BN, member 2 pseudogene	1	0.003	0.003	0.003	0.003	0.003	0.003	0.003	0.003	0.003	0.003	0.003	0.003	0.003	0.003	0.003	0.003	0.003	0.003	0.003	0.003	0.003	0.003
OR5BN1P	OR5BN1P	1	chr11:55900141-55900970	olfactory receptor, family 5, subfamily BN, member 1 pseudogene	1	0.003	0.003	0.003	0.003	0.003	0.003	0.003	0.003	0.003	0.003	0.003	0.003	0.003	0.003	0.003	0.003	0.003	0.003	0.003	0.003	0.003	0.003
OR8K4P	OR8K4P	1	chr11:55909990-55910862	olfactory receptor, family 8, subfamily K, member 4 pseudogene	0.531255	0.0134068	0.003	0.003	0.003	0.0194896	0.003	0.003	0.003	0.003	0.003	0.003	0.003	0.003	0.003	0.003	0.003	0.003	0.003	0.003	0.169508	0.003	0.003
OR5J7P	OR5J7P	1	chr11:55932975-55933397	olfactory receptor, family 5, subfamily J, member 7 pseudogene	1	0.003	0.003	0.003	0.003	0.003	0.003	0.003	0.003	0.003	0.003	0.003	0.003	0.003	0.003	0.003	0.003	0.003	0.003	0.003	0.003	0.003	0.003
OR8V1P	OR8V1P	1	chr11:55955806-55956763	olfactory receptor, family 8, subfamily V, member 1 pseudogene	23.2215	0.003	0.160531	0.0954495	0.0196781	0.003	0.003	0.003	0.003	0.003	0.003	0.003	0.003	0.003	0.003	0.003	0.003	0.003	0.003	0.003	0.003	0.003	0.003
OR8J2P	OR8J2P	1	chr11:55978331-55979296		62.4609	0.00862249	0.370615	1.02043	0.642826	0.120405		0.003	0.003	0.003	0.003	0.003	0.003	0.003	0.003	0.003	0.003	0.003	0.003	0.003	0.0929599	0.003	0.003
OR8I1P	OR8I1P	1	chr11:56064015-56064946	olfactory receptor, family 8, subfamily I, member 1 pseudogene	2.44602	0.003	0.003	0.003	0.0203523	0.003	0.003	0.003	0.003	0.003	0.003	0.003	0.003	0.003	0.003	0.003	0.003	0.003	0.003	0.003	0.003	0.003	0.003
OR8K2P	OR8K2P	1	chr11:56102617-56103544	olfactory receptor, family 8, subfamily K, member 2 pseudogene	1	0.003	0.003	0.003	0.003	0.003	0.003	0.003	0.003	0.003	0.003	0.003	0.003	0.003	0.003	0.003	0.003	0.003	0.003	0.003	0.003	0.003	0.003
OR8L1P	OR8L1P	1	chr11:56149110-56150065	olfactory receptor, family 8, subfamily L, member 1 pseudogene	15.8218	0.003	0.107307	0.0765552	0.003	0.003	0.003	0.003	0.003	0.003	0.003	0.003	0.003	0.003	0.003	0.003	0.003	0.003	0.003	0.003	0.003	0.003	0.003
OR5AL2P	OR5AL2P	1	chr11:56161204-56162124	olfactory receptor, family 5, subfamily AL, member 2 pseudogene	7.28145	0.003	0.003	0.040074	0.0413034	0.003	0.003	0.003	0.003	0.003	0.003	0.003	0.003	0.003	0.003	0.003	0.003	0.003	0.003	0.003	0.003	0.003	0.003
OR5AL1P	OR5AL1P	1	chr11:56180171-56181156		3.82178	0.003	0.003	0.0368613	0.003	0.003		0.003	0.003	0.003	0.003	0.003	0.003	0.003	0.003	0.003	0.003	0.003	0.003	0.003	0.003	0.003	0.003
OR5M4P	OR5M4P	1	chr11:56216143-56217068	olfactory receptor, family 5, subfamily M, member 4 pseudogene	51.5578	0.003	0.223587	0.33836	0.0205145	0.0362316	0.003	0.003	0.003	0.003	0.003	0.003	0.003	0.003	0.003	0.003	0.003	0.003	0.003	0.003	0.003	0.003	0.003
OR5M2P	OR5M2P	1	chr11:56246966-56247902	olfactory receptor, family 5, subfamily M, member 2 pseudogene	196.302	0.003	0.495475	1.58891	0.181972	0.0892729	0.003	0.003	0.003	0.003	0.003	0.003	0.003	0.003	0.003	0.003	0.003	0.003	0.003	0.003	0.003	0.003	0.003
OR5M7P	OR5M7P	1	chr11:56267774-56268746	olfactory receptor, family 5, subfamily M, member 7 pseudogene	1	0.003	0.003	0.003	0.003	0.003	0.003	0.003	0.003	0.003	0.003	0.003	0.003	0.003	0.003	0.003	0.003	0.003	0.003	0.003	0.003	0.003	0.003
OR5M6P	OR5M6P	1	chr11:56279709-56280646	olfactory receptor, family 5, subfamily M, member 6 pseudogene	15.7762	0.00643204	0.0549773	0.254676	0.060578	0.0356624	0.003	0.003	0.003	0.003	0.003	0.003	0.003	0.003	0.003	0.003	0.003	0.003	0.003	0.003	0.0579126	0.003	0.003
OR5M5P	OR5M5P	1	chr11:56294042-56294978	olfactory receptor, family 5, subfamily M, member 5 pseudogene	15.4621	0.003	0.003	0.176545	0.003	0.003	0.003	0.003	0.003	0.003	0.003	0.003	0.003	0.003	0.003	0.003	0.003	0.003	0.003	0.003	0.003	0.003	0.003
OR5M13P	OR5M13P	1	chr11:56364901-56365838	olfactory receptor, family 5, subfamily M, member 13 pseudogene	2.99706	0.00401901	0.003	0.0391809	0.003	0.003	0.003	0.003	0.003	0.003	0.003	0.003	0.003	0.003	0.003	0.003	0.003	0.003	0.003	0.003	0.0193042	0.003	0.003
OR5AM1P	OR5AM1P	1	chr11:56387221-56388286	olfactory receptor, family 5, subfamily AM, member 1 pseudogene	1	0.003	0.003	0.003	0.003	0.003	0.003	0.003	0.003	0.003	0.003	0.003	0.003	0.003	0.003	0.003	0.003	0.003	0.003	0.003	0.003	0.003	0.003
OR5M12P	OR5M12P	1	chr11:56396407-56397375	olfactory receptor, family 5, subfamily M, member 12 pseudogene	1	0.003	0.003	0.003	0.003	0.003		0.003	0.003	0.003	0.003	0.003	0.003	0.003	0.003	0.003	0.003	0.003	0.003	0.003	0.003	0.003	0.003
OR5AP1P	OR5AP1P	1	chr11:56400638-56401578	olfactory receptor, family 5, subfamily AP, member 1 pseudogene	12.133	0.003	0.003	0.136596	0.003	0.003	0.003	0.003	0.003	0.003	0.003	0.003	0.003	0.003	0.003	0.003	0.003	0.003	0.003	0.003	0.003	0.003	0.003
OR2AH1P	OR2AH1P	1	chr11:56436495-56437420	olfactory receptor, family 2, subfamily AH, member 1 pseudogene	19.4877	0.003	0.0558969	0.139325	0.0205145	0.0181158	0.003	0.003	0.003	0.003	0.003	0.003	0.003	0.003	0.003	0.003	0.003	0.003	0.003	0.003	0.003	0.003	0.003
OR9G3P	OR9G3P	1	chr11:56507654-56508568	olfactory receptor, family 9, subfamily G, member 3 pseudogene	63.4021	0.003	0.0567672	0.484788	0.145731	0.073539	0.003	0.003	0.003	0.003	0.003	0.003	0.003	0.003	0.003	0.003	0.003	0.003	0.003	0.003	0.003	0.003	0.003
OR9G2P	OR9G2P	1	chr11:56518472-56519460	olfactory receptor, family 9, subfamily G, member 2 pseudogene	1	0.003	0.003	0.003	0.003	0.003	0.003	0.003	0.003	0.003	0.003	0.003	0.003	0.003	0.003	0.003	0.003	0.003	0.003	0.003	0.003	0.003	0.003
OR5G1P	OR5G1P	1	chr11:56542740-56543682	olfactory receptor, family 5, subfamily G, member 1 pseudogene	0.379917	0.00789646	0.003	0.003	0.003	0.003	0.003	0.003	0.003	0.003	0.003	0.0813434	0.003	0.003	0.003	0.003	0.003	0.003	0.003	0.003	0.003	0.003	0.003
OR5G4P	OR5G4P	1	chr11:56557596-56558577	olfactory receptor, family 5, subfamily G, member 4 pseudogene	26.1217	0.003	0.003	0.240786	0.0190942	0.0505802	0.003	0.003	0.003	0.003	0.003	0.003	0.003	0.003	0.003	0.003	0.003	0.003	0.003	0.003	0.003	0.003	0.003
OR5G5P	OR5G5P	1	chr11:56569334-56570270	olfactory receptor, family 5, subfamily G, member 5 pseudogene	2.66447	0.0264904	0.165158	0.0784646	0.003	0.0357091	0.363387	0.003	0.003	0.003	0.003	0.003	0.003	0.003	0.003	0.378847	0.003	0.003	0.003	0.003	0.003	0.003	0.003
OR5G3P	OR5G3P	1	chr11:56587051-56587992		7.69908	0.00776341	0.164032	0.0194882	0.0200876	0.0354766		0.003	0.003	0.003	0.003	0.003	0.003	0.003	0.003	0.0792146	0.003	0.003	0.003	0.003	0.003	0.003	0.003
OR5AK3P	OR5AK3P	1	chr11:56738524-56739451	olfactory receptor, family 5, subfamily AK, member 3 pseudogene	82.8417	0.003	0.445932	0.337461	0.102301	0.108406	0.003	0.003	0.003	0.003	0.003	0.003	0.003	0.003	0.003	0.003	0.003	0.003	0.003	0.003	0.003	0.003	0.003
OR5AK1P	OR5AK1P	1	chr11:56785565-56786493	olfactory receptor, family 5, subfamily AK, member 1 pseudogene	6.04931	0.0204528	0.222656	0.13877	0.0612993	0.0721751	0.003	0.003	0.003	0.003	0.003	0.003	0.003	0.003	0.003	0.282244	0.003	0.003	0.003	0.003	0.003	0.003	0.003
OR5BQ1P	OR5BQ1P	1	chr11:56796861-56797197	olfactory receptor, family 5, subfamily BQ, member 1 pseudogene	1	0.003	0.003	0.003	0.003	0.003		0.003	0.003	0.003	0.003	0.003	0.003	0.003	0.003	0.003	0.003	0.003	0.003	0.003	0.003	0.003	0.003
OR5AK4P	OR5AK4P	1	chr11:56805008-56805933	olfactory receptor, family 5, subfamily AK, member 4 pseudogene	0.853741	0.0886203	0.223587	0.0199035	0.0410291	0.0181158		0.0452287	0.0222187	0.604191	0.003	0.104084	0.003	0.003	0.071694	0.445377	0.003	0.003	0.003	0.003	0.0981322	0.003	0.003
OR5AO1P	OR5AO1P	1	chr11:56812553-56812884	olfactory receptor, family 5, subfamily AO, member 1 pseudogene	0.0777354	0.0385924	0.003	0.003	0.003	0.003		0.003	0.003	0.572479	0.003	0.003	0.003	0.003	0.003	0.003	0.003	0.003	0.003	0.003	0.003	0.003	0.003
OR5BP1P	OR5BP1P	1	chr11:56823174-56823608	olfactory receptor, family 5, subfamily BP, member 1 pseudogene	1	0.003	0.003	0.003	0.003	0.003		0.003	0.003	0.003	0.003	0.003	0.003	0.003	0.003	0.003	0.003	0.003	0.003	0.003	0.003	0.003	0.003
OR52U1P	OR52U1P	1	chr11:5740519-5741496	olfactory receptor, family 52, subfamily U, member 1 pseudogene	0.745108	0.0209425	0.003	0.0372286	0.0191891	0.003	0.003	0.003	0.29008	0.003	0.003	0.003	0.003	0.003	0.003	0.003	0.003	0.003	0.003	0.003	0.003	0.003	0.003
OR52P1P	OR52P1P	1	chr11:5747731-5748691	olfactory receptor, family 52, subfamily P, member 1 pseudogene	1.98813	0.0240395	0.0532969	0.0760681	0.0588096	0.003	0.003	0.003	0.105936	0.0960235	0.003	0.003	0.0204706	0.003	0.003	0.003	0.003	0.0387183	0.003	0.003	0.0561459	0.003	0.037338
OR5BA1P	OR5BA1P	1	chr11:57633773-57634752	olfactory receptor, family 5, subfamily BA, member 1 pseudogene	25.516	0.0157064	0.831748	0.371361	0.0957078	0.304234	0.294181	0.0420688	0.003	0.003	0.0611894	0.003	0.003	0.003	0.003	0.003	0.003	0.075533	0.003	0.003	0.0365105	0.003	0.003
OR5AZ1P	OR5AZ1P	1	chr11:57684773-57685702	olfactory receptor, family 5, subfamily AZ, member 1 pseudogene	0.571186	0.00525223	0.003	0.003	0.003	0.003	0.003	0.003	0.003	0.003	0.003	0.003	0.003	0.003	0.003	0.003	0.003	0.003	0.003	0.003	0.0390357	0.003	0.003
OR5BD1P	OR5BD1P	1	chr11:57713026-57713943	olfactory receptor, family 5, subfamily BD, member 1 pseudogene	1	0.003	0.003	0.003	0.003	0.003	0.124608	0.003	0.003	0.003	0.003	0.003	0.003	0.003	0.003	0.003	0.003	0.003	0.003	0.003	0.003	0.003	0.003
OR9L1P	OR9L1P	1	chr11:57844820-57846077	olfactory receptor, family 9, subfamily L, member 1 pseudogene	1	0.003	0.003	0.003	0.003	0.003	0.003	0.003	0.003	0.003	0.003	0.003	0.003	0.003	0.003	0.003	0.003	0.003	0.003	0.003	0.003	0.003	0.003
OR56B2P	OR56B2P	1	chr11:5786391-5787276	olfactory receptor, family 56, subfamily B, member 2 pseudogene	5.46328	0.0197798	0.003	0.23126	0.194991	0.003	0.003	0.003	0.21175	0.003	0.003	0.003	0.022732	0.003	0.003	0.003	0.003	0.0429955	0.003	0.003	0.003	0.003	0.003
OR9I3P	OR9I3P	1	chr11:57876191-57877133	olfactory receptor, family 9, subfamily I, member 3 pseudogene	8.29407	0.003	0.0546031	0.0389257	0.003	0.003		0.003	0.003	0.003	0.003	0.003	0.003	0.003	0.003	0.003	0.003	0.003	0.003	0.003	0.003	0.003	0.003
OR9I2P	OR9I2P	1	chr11:57911897-57912893	olfactory receptor, family 9, subfamily I, member 2 pseudogene	44.5827	0.003	0.101727	0.254575	0.11248	0.0662109	0.003	0.003	0.003	0.003	0.003	0.003	0.003	0.003	0.003	0.003	0.003	0.003	0.003	0.003	0.003	0.003	0.003
OR5BL1P	OR5BL1P	1	chr11:57938560-57939193	olfactory receptor, family 5, subfamily BL, member 1 pseudogene	1	0.003	0.003	0.003	0.003	0.003		0.003	0.003	0.003	0.003	0.003	0.003	0.003	0.003	0.003	0.003	0.003	0.003	0.003	0.003	0.003	0.003
OR10Q2P	OR10Q2P	1	chr11:58059300-58060243	olfactory receptor, family 10, subfamily Q, member 2 pseudogene	9.83817	0.003	0.109058	0.003	0.003	0.003		0.003	0.003	0.003	0.003	0.003	0.003	0.003	0.003	0.003	0.003	0.003	0.003	0.003	0.003	0.003	0.003
OR5BC1P	OR5BC1P	1	chr11:58085111-58085945	olfactory receptor, family 5, subfamily BC, member 1 pseudogene	1	0.003	0.003	0.003	0.003	0.003	0.003	0.003	0.003	0.003	0.003	0.003	0.003	0.003	0.003	0.003	0.003	0.003	0.003	0.003	0.003	0.003	0.003
OR5B19P	OR5B19P	1	chr11:58111285-58112143	olfactory receptor, family 5, subfamily B, member 19 pseudogene	2.62655	0.003	0.003	0.003	0.0225186	0.003	0.003	0.003	0.003	0.003	0.003	0.003	0.003	0.003	0.003	0.003	0.003	0.003	0.003	0.003	0.003	0.003	0.003
OR5B10P	OR5B10P	1	chr11:58116460-58117101	olfactory receptor, family 5, subfamily B, member 10 pseudogene	1	0.003	0.003	0.003	0.003	0.003	0.003	0.003	0.003	0.003	0.003	0.003	0.003	0.003	0.003	0.003	0.003	0.003	0.003	0.003	0.003	0.003	0.003
OR5B1P	OR5B1P	1	chr11:58133302-58134236	olfactory receptor, family 5, subfamily B, member 1 pseudogene	0.465336	0.00644696	0.003	0.003	0.003	0.003	0.003	0.003	0.003	0.003	0.003	0.003	0.003	0.003	0.003	0.003	0.003	0.003	0.003	0.003	0.0581513	0.003	0.003
OR5B15P	OR5B15P	1	chr11:58155043-58155959	olfactory receptor, family 5, subfamily B, member 15 pseudogene	0.680911	0.00440586	0.003	0.003	0.003	0.003		0.003	0.003	0.0254938	0.003	0.003	0.003	0.003	0.003	0.003	0.003	0.003	0.003	0.003	0.003	0.003	0.003
OR52N3P	OR52N3P	1	chr11:5821593-5822551	olfactory receptor, family 52, subfamily N, member 3 pseudogene	3.49256	0.0147404	0.003	0.0571966	0.0589592	0.0867706	0.003	0.003	0.0637308	0.003	0.003	0.003	0.0205251	0.003	0.003	0.003	0.003	0.003	0.003	0.003	0.11259	0.003	0.003
OR52E7P	OR52E7P	1	chr11:5895189-5896118	olfactory receptor, family 52, subfamily E, member 7 pseudogene	1	0.003	0.003	0.003	0.003	0.003	0.003	0.003	0.003	0.003	0.003	0.003	0.003	0.003	0.003	0.003	0.003	0.003	0.003	0.003	0.003	0.003	0.003
OR5AN2P	OR5AN2P	1	chr11:59077114-59078061	olfactory receptor, family 5, subfamily AN, member 2 pseudogene	12.3864	0.003	0.0542338	0.0193369	0.0398642	0.0352016	0.003	0.003	0.003	0.003	0.003	0.003	0.003	0.003	0.003	0.003	0.003	0.003	0.003	0.003	0.003	0.003	0.003
OR5BR1P	OR5BR1P	1	chr11:59100228-59101558	olfactory receptor, family 5, subfamily BR, member 1 pseudogene	1	0.003	0.003	0.003	0.003	0.003	0.003	0.003	0.003	0.003	0.003	0.003	0.003	0.003	0.003	0.003	0.003	0.003	0.003	0.003	0.003	0.003	0.003
OR5BB1P	OR5BB1P	1	chr11:59158825-59159764	olfactory receptor, family 5, subfamily BB, member 1 pseudogene	18.461	0.003	0.003	0.195392	0.02014	0.003	0.003	0.003	0.003	0.003	0.003	0.003	0.003	0.003	0.003	0.003	0.003	0.003	0.003	0.003	0.003	0.003	0.003
OR52Q1P	OR52Q1P	1	chr11:5924864-5925708	olfactory receptor, family 52, subfamily Q, member 1 pseudogene	1	0.003	0.003	0.003	0.003	0.003		0.003	0.003	0.003	0.003	0.003	0.003	0.003	0.003	0.003	0.003	0.003	0.003	0.003	0.003	0.003	0.003
OR4D8P	OR4D8P	1	chr11:59259124-59260083	olfactory receptor, family 4, subfamily D, member 8 pseudogene	1	0.003	0.003	0.003	0.003	0.003	0.003	0.003	0.003	0.003	0.003	0.003	0.003	0.003	0.003	0.003	0.003	0.003	0.003	0.003	0.003	0.003	0.003
OR4D7P	OR4D7P	1	chr11:59299169-59300183	olfactory receptor, family 4, subfamily D, member 7 pseudogene	7.70163	0.003	0.0497281	0.003	0.0366915	0.003	0.003	0.003	0.003	0.003	0.003	0.003	0.003	0.003	0.003	0.003	0.003	0.003	0.003	0.003	0.003	0.003	0.003
OR10Y1P	OR10Y1P	1	chr11:59495991-59496965	olfactory receptor, family 10, subfamily Y, member 1 pseudogene	0.467483	0.0230034	0.003	0.003	0.003	0.0340148	0.003	0.003	0.003	0.0235682	0.123176	0.003	0.003	0.0199434	0.003	0.003	0.003	0.003	0.003	0.003	0.165367	0.003	0.003
OR10V3P	OR10V3P	1	chr11:59508797-59509522	olfactory receptor, family 10, subfamily V, member 3 pseudogene	1.00022	0.0220444	0.003	0.0542614	0.0279359	0.003	0.003	0.003	0.003	0.003	0.003	0.003	0.003	0.147566	0.003	0.003	0.003	0.003	0.003	0.003	0.163145	0.003	0.003
OR10V2P	OR10V2P	1	chr11:59516283-59517047	olfactory receptor, family 10, subfamily V, member 2 pseudogene	4.88029	0.0343976	0.216208	0.177357	0.20876	0.0691554	0.003	0.003	0.114522	0.0973182	0.003	0.003	0.003	0.003	0.003	0.003	0.003	0.0784806	0.0500098	0.003	0.177031	0.003	0.003
OR56A7P	OR56A7P	1	chr11:6067039-6067977	olfactory receptor, family 56, subfamily A, member 7 pseudogene	6.70557	0.003	0.0549021	0.0195648	0.003	0.003	0.003	0.003	0.003	0.003	0.003	0.003	0.003	0.003	0.003	0.003	0.003	0.003	0.003	0.003	0.003	0.003	0.003
OR52L2P	OR52L2P	1	chr11:6078518-6079460	olfactory receptor, family 52, subfamily L, member 2 pseudogene	1	0.003	0.003	0.003	0.003	0.003		0.003	0.003	0.003	0.003	0.003	0.003	0.003	0.003	0.003	0.003	0.003	0.003	0.003	0.003	0.003	0.003
OR52X1P	OR52X1P	1	chr11:6088075-6089022	olfactory receptor, family 52, subfamily X, member 1 pseudogene	1	0.003	0.003	0.003	0.003	0.003	0.003	0.003	0.003	0.003	0.003	0.003	0.003	0.003	0.003	0.003	0.003	0.003	0.003	0.003	0.003	0.003	0.003
OR56B3P	OR56B3P	1	chr11:6149839-6150783	olfactory receptor, family 56, subfamily B, member 3 pseudogene	0.460438	0.00651553	0.003	0.003	0.003	0.003	0.003	0.003	0.003	0.003	0.003	0.003	0.003	0.003	0.003	0.003	0.003	0.003	0.003	0.003	0.003	0.0592485	0.003
OR52B1P	OR52B1P	1	chr11:6172824-6173779	olfactory receptor, family 52, subfamily B, member 1 pseudogene	83.6309	0.003	0.214614	0.612442	0.0197284	0.156786	0.003	0.003	0.003	0.003	0.003	0.003	0.003	0.003	0.003	0.003	0.003	0.003	0.003	0.003	0.003	0.003	0.003
OR7E145P	OR7E145P	1	chr11:67489929-67490955	olfactory receptor, family 7, subfamily E, member 145 pseudogene	27.3989	0.003	0.048999	0.105261	0.126615	0.0479115	0.003	0.003	0.003	0.003	0.003	0.003	0.003	0.003	0.003	0.003	0.003	0.003	0.003	0.003	0.003	0.003	0.003
OR7E11P	OR7E11P	1	chr11:67503067-67504018	olfactory receptor, family 7, subfamily E, member 11 pseudogene	3.87425	0.04301	0.0377594	0.153899	0.317275	0.157593	0.175404	0.0109125	0.0808994	0.003	0.0268067	0.022434	0.0227897	0.0051398	0.0261391	0.107606	0.140737	0.00718412	0.0190115	0.151022	0.0441966	0.0172815	0.003
OR7E1P	OR7E1P	1	chr11:67741705-67742728	olfactory receptor, family 7, subfamily E, member 1 pseudogene	3.67748	0.0133403	0.003	0.0704221	0.0907585	0.0320537	0.003	0.003	0.00651776	0.00984647	0.003	0.003	0.003	0.003	0.003	0.003	0.148792	0.003	0.00569239	0.003	0.00959554	0.003	0.003
OR7E87P	OR7E87P	1	chr11:71304439-71305459	olfactory receptor, family 7, subfamily E, member 87 pseudogene	1.35184	0.0105876	0.003	0.003	0.003	0.0482509	0.003	0.003	0.00654179	0.00988276	0.019369	0.003	0.003	0.003	0.003	0.003	0.003	0.0733583	0.00571337	0.003	0.00963091	0.0179054	0.003
OR7E4P	OR7E4P	1	chr11:71331058-71332078	olfactory receptor, family 7, subfamily E, member 4 pseudogene	12.3542	0.00640251	0.003	0.123676	0.109296	0.0804182	0.003	0.003	0.00654179	0.00988276	0.003	0.003	0.003	0.003	0.003	0.003	0.003	0.003	0.00571337	0.003	0.0443022	0.003	0.003
OR7E128P	OR7E128P	1	chr11:71604452-71605484	olfactory receptor, family 7, subfamily E, member 128 pseudogene	1.2559	0.123675	0.203856	0.0696833	0.125732	0.222025	0.003	0.003	0.203512	0.0855608	0.119731	0.108719	0.0747442	0.352315	0.147214	0.003	0.14717	0.0933376	0.168911	0.003	0.427094	0.0384986	0.003
OR7E126P	OR7E126P	1	chr11:71614230-71615165	olfactory receptor, family 7, subfamily E, member 126 pseudogene	1.7009	0.132731	0.248078	0.392839	0.101228	0.160902	0.292345	0.003	0.148417	0.0744877	0.0598366	0.0290858	0.0998645	0.278389	0.0267128	0.00831945	0.289737	0.0674112	0.344789	0.003	0.550389	0.101633	0.0386186
OR8R1P	OR8R1P	1	chr11:72960359-72960913	olfactory receptor, family 8, subfamily R, member 1 pseudogene	0.405905	0.0297763	0.003	0.0393453	0.003	0.003	0.0682383	0.003	0.183648	0.003	0.003	0.003	0.003	0.0440192	0.003	0.003	0.003	0.209753	0.003	0.003	0.003	0.003	0.003
OR2AT2P	OR2AT2P	1	chr11:74782164-74783136	olfactory receptor, family 2, subfamily AT, member 2 pseudogene	303.165	0.003	0.262301	2.3601	0.810982	0.2046	0.003	0.003	0.003	0.003	0.003	0.003	0.003	0.003	0.003	0.003	0.003	0.003	0.003	0.003	0.003	0.003	0.003
OR2AT1P	OR2AT1P	1	chr11:74842147-74842917	olfactory receptor, family 2, subfamily AT, member 1 pseudogene	0.0596694	0.050277	0.003	0.003	0.003	0.003	0.003	0.003	0.254933	0.0320942	0.0279559	0.106154	0.003	0.003	0.003	0.003	0.003	0.003	0.003	0.003	0.350295	0.003	0.003
OR10AB1P	OR10AB1P	1	chr11:7749946-7750884	olfactory receptor, family 10, subfamily AB, member 1 pseudogene	2.68975	0.0386523	0.109804	0.156518	0.0604989	0.0890394	0.186948	0.003	0.003	0.0247275	0.003	0.003	0.0421718	0.104622	0.164315	0.003	0.003	0.0598231	0.003	0.003	0.192778	0.003	0.003
OR5P4P	OR5P4P	1	chr11:7767536-7768456	olfactory receptor, family 5, subfamily P, member 4 pseudogene	1.76808	0.00419263	0.003	0.003	0.0206517	0.003	0.003	0.003	0.003	0.003	0.0220821	0.003	0.003	0.003	0.003	0.003	0.003	0.003	0.003	0.003	0.003	0.003	0.003
OR5P1P	OR5P1P	1	chr11:7794439-7795361	olfactory receptor, family 5, subfamily P, member 1 pseudogene	4.23631	0.0052483	0.003	0.0799336	0.003	0.003	0.003	0.003	0.003	0.003	0.003	0.003	0.003	0.003	0.003	0.003	0.003	0.003	0.0389728	0.003	0.003	0.003	0.003
OR5E1P	OR5E1P	1	chr11:7870246-7871179	olfactory receptor, family 5, subfamily E, member 1 pseudogene	1.37013	0.0568181	0.0552805	0.0984685	0.121793	0.0358501	0.301795	0.003	0.003	0.003	0.15181	0.0617629	0.003	0.003	0.003	0.003	0.003	0.003	0.038383	0.003	0.621134	0.003	0.003
OR7E13P	OR7E13P	1	chr11:86543569-86544513	olfactory receptor, family 7, subfamily E, member 13 pseudogene	0.966257	0.247394	0.490093	0.155298	0.240115	0.0706771	0.162167	1.8507	0.173173	0.245264	0.705009	0.003	0.0836578	0.124525	0.003	0.216955	0.003	0.336241	0.0378108	0.114341	0.0191211	0.039499	0.003
OR7E2P	OR7E2P	1	chr11:86568075-86569053	olfactory receptor, family 7, subfamily E, member 2 pseudogene	0.747336	0.0374575	0.0520517	0.0185912	0.0383306	0.003	0.003	0.003	0.0206932	0.0468922	0.204229	0.003	0.0399865	0.0595202	0.0222572	0.0565632	0.003	0.0378154	0.0903635	0.003	0.003	0.003	0.003
OR4F2P	OR4F2P	1	chr11:86651-87586	olfactory receptor, family 4, subfamily F, member 2 pseudogene	5.2539	0.00346706	0.00612539	0.003	0.0607369	0.003	0.003	0.003	0.00486976	0.003	0.003	0.003	0.003	0.003	0.003	0.003	0.003	0.003	0.003	0.003	0.00860319	0.003	0.003
OR7A19P	OR7A19P	1	chr12:46986355-46987088	olfactory receptor, family 7, subfamily A, member 19 pseudogene	0.15613	0.0192148	0.003	0.003	0.003	0.003		0.003	0.12126	0.003	0.003	0.003	0.003	0.003	0.003	0.003	0.144177	0.003	0.003	0.003	0.003	0.003	0.003
OR5BK1P	OR5BK1P	1	chr12:48749441-48750328	olfactory receptor, family 5, subfamily BK, member 1 pseudogene	1.38116	0.172183	0.531207	0.146752	0.21605	0.0572402	0.003	0.286517	0.0938348	0.611329	0.254675	0.003	0.135991	0.157441	0.003	0.003	0.003	0.300085	0.30732	0.123913	0.0621652	0.406652	0.003
OR5BT1P	OR5BT1P	1	chr12:48779133-48780088	olfactory receptor, family 5, subfamily BT, member 1 pseudogene	1.3881	0.0262004	0.0536534	0.0191388	0.003	0.0696828	0.059196	0.003	0.0426574	0.0483323	0.0421002	0.003	0.003	0.003	0.003	0.003	0.003	0.097442	0.003	0.003	0.003	0.155675	0.003
OR5BJ1P	OR5BJ1P	1	chr12:48788265-48789169	olfactory receptor, family 5, subfamily BJ, member 1 pseudogene	0.728238	0.00411953	0.003	0.003	0.003	0.003	0.003	0.003	0.003	0.003	0.003	0.003	0.003	0.003	0.003	0.003	0.003	0.0209125	0.003	0.003	0.003	0.003	0.003
OR8T1P	OR8T1P	1	chr12:48835815-48836730	olfactory receptor, family 8, subfamily T, member 1 pseudogene	0.407218	0.479521	0.340122	0.0605167	0.270279	0.11016	0.003	0.2064	0.0675965	1.42966	0.400281	0.443318	0.15239	0.003	0.0727054	0.2053	0.214324	0.638229	1.14137	0.396728	2.01023	0.287804	0.003
OR5BS1P	OR5BS1P	1	chr12:48953664-48954597	olfactory receptor, family 5, subfamily BS, member 1 pseudogene	17.13	0.003	0.110561	0.003	0.0202988	0.0717002	0.003	0.003	0.003	0.003	0.003	0.003	0.003	0.003	0.003	0.003	0.003	0.003	0.003	0.003	0.003	0.003	0.003
OR11M1P	OR11M1P	1	chr12:49021622-49022595	olfactory receptor, family 11, subfamily M, member 1 pseudogene	0.553913	0.00541601	0.003	0.003	0.003	0.003	0.003	0.003	0.0416562	0.003	0.003	0.003	0.003	0.003	0.003	0.003	0.003	0.003	0.003	0.003	0.003	0.003	0.003
OR7E47P	OR7E47P	1	chr12:52501101-52502047	olfactory receptor, family 7, subfamily E, member 47 pseudogene	1.24281	3.68624	2.28091	2.40089	8.46212	5.18133		0.0659176	0.0863525	0.171221	0.255674	1.0113	0.125148	1.34538	0.510834	28.2459	1.35528	4.89191	2.56419	0.228064	18.0015	0.118177	0.003
OR9K1P	OR9K1P	1	chr12:55509316-55510255	olfactory receptor, family 9, subfamily K, member 1 pseudogene	55.6642	0.003	0.274135	0.214931	0.16112	0.0177846	0.136232	0.003	0.003	0.003	0.003	0.003	0.003	0.003	0.003	0.003	0.003	0.003	0.003	0.003	0.003	0.003	0.003
OR9R1P	OR9R1P	1	chr12:55552630-55553584	olfactory receptor, family 9, subfamily R, member 1 pseudogene	0.649586	0.0110661	0.003	0.003	0.0197536	0.003	0.003	0.003	0.003	0.003	0.003	0.003	0.003	0.003	0.003	0.003	0.003	0.003	0.003	0.003	0.132058	0.003	0.003
OR10U1P	OR10U1P	1	chr12:55587644-55588600	olfactory receptor, family 10, subfamily U, member 1 pseudogene	14.8848	0.003	0.003	0.152915	0.0197032	0.003	0.003	0.003	0.003	0.003	0.003	0.003	0.003	0.003	0.003	0.003	0.003	0.003	0.003	0.003	0.003	0.003	0.003
OR6C69P	OR6C69P	1	chr12:55656322-55657218	olfactory receptor, family 6, subfamily C, member 69 pseudogene	5.88391	0.00536893	0.0582514	0.0621096	0.003	0.003	0.003	0.003	0.003	0.003	0.003	0.003	0.003	0.003	0.003	0.003	0.003	0.003	0.003	0.003	0.0409028	0.003	0.003
OR6C72P	OR6C72P	1	chr12:55677533-55678467	olfactory receptor, family 6, subfamily C, member 72 pseudogene	5.46732	0.003	0.003	0.0393356	0.0202722	0.003	0.003	0.003	0.003	0.003	0.003	0.003	0.003	0.003	0.003	0.003	0.003	0.003	0.003	0.003	0.003	0.003	0.003
OR6C5P	OR6C5P	1	chr12:55705618-55706541	olfactory receptor, family 6, subfamily C, member 5 pseudogene	2.41306	0.003	0.003	0.0199567	0.003	0.003	0.003	0.003	0.003	0.003	0.003	0.003	0.003	0.003	0.003	0.003	0.003	0.003	0.003	0.003	0.003	0.003	0.003
OR6C7P	OR6C7P	1	chr12:55736621-55737560	olfactory receptor, family 6, subfamily C, member 7 pseudogene	9.5575	0.003	0.054827	0.0390784	0.003	0.0177846	0.003	0.003	0.003	0.003	0.003	0.003	0.003	0.003	0.003	0.003	0.003	0.003	0.003	0.003	0.003	0.003	0.003
OR6C71P	OR6C71P	1	chr12:55770584-55771520	olfactory receptor, family 6, subfamily C, member 71 pseudogene	35.4151	0.003	0.0550528	0.0784646	0.202191	0.0892729	0.003	0.003	0.003	0.003	0.003	0.003	0.003	0.003	0.003	0.003	0.003	0.003	0.003	0.003	0.003	0.003	0.003
OR6C66P	OR6C66P	1	chr12:55782228-55783161	olfactory receptor, family 6, subfamily C, member 66 pseudogene	80.3785	0.003	0.442244	0.275712	0.243586	0.003	0.003	0.003	0.003	0.003	0.003	0.003	0.003	0.003	0.003	0.003	0.003	0.003	0.003	0.003	0.003	0.003	0.003
OR6C73P	OR6C73P	1	chr12:55790059-55791057	olfactory receptor, family 6, subfamily C, member 73 pseudogene	1	0.003	0.003	0.003	0.003	0.003	0.003	0.003	0.003	0.003	0.003	0.003	0.003	0.003	0.003	0.003	0.003	0.003	0.003	0.003	0.003	0.003	0.003
OR6C64P	OR6C64P	1	chr12:55916376-55917255	olfactory receptor, family 6, subfamily C, member 64 pseudogene	0.706561	0.00424592	0.003	0.003	0.003	0.003	0.003	0.003	0.003	0.003	0.003	0.003	0.0229347	0.003	0.003	0.003	0.003	0.003	0.003	0.003	0.003	0.003	0.003
OR6U2P	OR6U2P	1	chr12:56005406-56006338	olfactory receptor, family 6, subfamily U, member 2 pseudogene	116.025	0.003	0.16607	1.2029	0.0203255	0.003		0.003	0.003	0.003	0.003	0.003	0.003	0.003	0.003	0.003	0.003	0.003	0.003	0.003	0.003	0.003	0.003
OR10AE3P	OR10AE3P	1	chr12:56039978-56040447	olfactory receptor, family 10, subfamily AE, member 3 pseudogene	0.114104	0.0262918	0.003	0.003	0.003	0.003		0.003	0.003	0.003	0.003	0.003	0.003	0.003	0.003	0.003	0.003	0.003	0.003	0.003	0.375669	0.003	0.003
OR7E140P	OR7E140P	1	chr12:8567375-8568371	olfactory receptor, family 7, subfamily E, member 140 pseudogene	1.67188	0.00515241	0.00971029	0.003	0.0187466	0.003	0.0154648	0.003	0.0105704	0.023016	0.00544296	0.003	0.003	0.003	0.003	0.003	0.003	0.0070548	0.003	0.003	0.003	0.00335443	0.003
OR7E148P	OR7E148P	1	chr12:8580257-8581210	olfactory receptor, family 7, subfamily E, member 148 pseudogene	0.37473	0.0095934	0.00537973	0.003	0.003	0.003	0.121578	0.0108833	0.00583249	0.00444233	0.0105532	0.0140254	0.00792061	0.003	0.003	0.0602279	0.003	0.003	0.003	0.003	0.003	0.0156092	0.003
OR7E149P	OR7E149P	1	chr12:8589998-8590979	olfactory receptor, family 7, subfamily E, member 149 pseudogene	0.906456	0.00521222	0.0098986	0.003	0.003	0.003	0.0155217	0.003	0.010775	0.0234615	0.00554832	0.003	0.003	0.003	0.003	0.003	0.003	0.00719136	0.003	0.003	0.003	0.00341937	0.003
OR7E36P	OR7E36P	1	chr13:42005399-42006394	olfactory receptor, family 7, subfamily E, member 36 pseudogene	16.0415	0.0363332	0.0865776	0.127443	0.957238	1.1601	0.469589	0.0309117	0.0156456	0.0730284	0.0253116	0.0211828	0.0215187	0.00485314	0.0246812	0.101604	0.171406	0.0252837	0.0179512	0.003	0.0256352	0.0163176	0.003
OR7E155P	OR7E155P	1	chr13:42013972-42014998	olfactory receptor, family 7, subfamily E, member 155 pseudogene	4.21178	0.011214	0.048999	0.0175435	0.0904396	0.031941	0.003	0.003	0.003	0.0662205	0.003	0.003	0.003	0.003	0.003	0.003	0.003	0.0712032	0.003	0.003	0.003	0.003	0.003
OR7E37P	OR7E37P	1	chr13:42016805-42017799	olfactory receptor, family 7, subfamily E, member 37 pseudogene	1.81896	0.0168358	0.0356949	0.0182283	0.0187922	0.0497792	0.405333	0.010317	0.0156655	0.0271811	0.0253437	0.0212097	0.021546	0.0048593	0.0247125	0.0463188	0.0173552	0.00679205	0.017974	0.003	0.00776	0.0163383	0.003
OR7E101P	OR7E101P	1	chr13:47034669-47035343	olfactory receptor, family 7, subfamily E, member 101 pseudogene	4.70816	0.0916896	0.003	0.0896975	1.63106	0.003	0.372931	0.003	0.102412	0.003	0.235841	0.003	0.003	0.003	0.003	0.031104	0.129885	0.003	0.003	0.003	0.934792	0.003	0.003
OR7E156P	OR7E156P	1	chr13:64316446-64316993	olfactory receptor, family 7, subfamily E, member 156 pseudogene	0.375657	0.00798601	0.003	0.003	0.003	0.003	0.003	0.003	0.003	0.003	0.003	0.003	0.003	0.003	0.003	0.003	0.003	0.003	0.003	0.003	0.0827761	0.003	0.003
OR7E104P	OR7E104P	1	chr13:64411060-64411806	olfactory receptor, family 7, subfamily E, member 104 pseudogene	0.273244	0.0109792	0.003	0.003	0.003	0.003	0.003	0.003	0.003	0.003	0.003	0.003	0.003	0.003	0.003	0.003	0.003	0.003	0.003	0.003	0.130667	0.003	0.003
OR7E111P	OR7E111P	1	chr13:68476375-68477356	olfactory receptor, family 7, subfamily E, member 111 pseudogene	2.31838	0.00508851	0.003	0.003	0.0381885	0.003	0.003	0.003	0.003	0.003	0.003	0.003	0.003	0.003	0.003	0.003	0.003	0.003	0.003	0.003	0.0364162	0.003	0.003
OR7E33P	OR7E33P	1	chr13:68485132-68486080	olfactory receptor, family 7, subfamily E, member 33 pseudogene	0.223986	0.0221354	0.0108321	0.003	0.003	0.003	0.0193401	0.0109567	0.0166368	0.00447226	0.0354145	0.0225247	0.0208017	0.0258029	0.0192976	0.00817367	0.003	0.00327871	0.0190884	0.003	0.141367	0.0173513	0.003
OR11H13P	OR11H13P	1	chr14:19806452-19807382	olfactory receptor, family 11, subfamily H, member 13 pseudogene	1	0.003	0.003	0.003	0.003	0.003		0.003	0.003	0.003	0.003	0.003	0.003	0.003	0.003	0.003	0.003	0.003	0.003	0.003	0.003	0.003	0.003
OR11K2P	OR11K2P	1	chr14:20201504-20202452	olfactory receptor, family 11, subfamily K, member 2 pseudogene	1.11593	0.0253964	0.0541606	0.0386239	0.003	0.0175781	0.003	0.003	0.003	0.003	0.003	0.003	0.003	0.003	0.003	0.003	0.003	0.003	0.003	0.003	0.361342	0.003	0.003
OR4H12P	OR4H12P	1	chr14:20228068-20228944	olfactory receptor, family 4, subfamily H, member 12 pseudogene	1.14406	0.00676163	0.003	0.003	0.0219427	0.003	0.003	0.003	0.003	0.003	0.003	0.003	0.003	0.003	0.003	0.003	0.003	0.003	0.003	0.003	0.063186	0.003	0.003
OR4N1P	OR4N1P	1	chr14:20264494-20265443	olfactory receptor, family 4, subfamily N, member 1 pseudogene	0.0349226	0.0859044	0.003	0.003	0.003	0.003	0.003	0.003	0.003	0.003	0.003	0.003	0.003	0.003	0.003	0.003	0.003	0.003	0.003	0.003	1.32947	0.003	0.003
OR4K6P	OR4K6P	1	chr14:20315525-20316464	olfactory receptor, family 4, subfamily K, member 6 pseudogene	1.91836	0.00642216	0.003	0.003	0.04028	0.003	0.003	0.003	0.003	0.003	0.003	0.003	0.003	0.003	0.003	0.003	0.003	0.003	0.003	0.003	0.0577546	0.003	0.003
OR4K3P	OR4K3P	1	chr14:20336358-20337302		5.75238	0.003	0.003	0.003	0.0600286	0.003		0.003	0.003	0.003	0.003	0.003	0.003	0.003	0.003	0.003	0.003	0.003	0.003	0.003	0.003	0.003	0.003
OR4K4P	OR4K4P	1	chr14:20373863-20374794	olfactory receptor, family 4, subfamily K, member 4 pseudogene	1	0.003	0.003	0.003	0.003	0.003	0.003	0.003	0.003	0.003	0.003	0.003	0.003	0.003	0.003	0.003	0.003	0.003	0.003	0.003	0.003	0.003	0.003
OR4K16P	OR4K16P	1	chr14:20424705-20425713	olfactory receptor, family 4, subfamily K, member 16 pseudogene	28.4662	0.003	0.003	0.003	0.332594	0.003	0.003	0.003	0.003	0.003	0.003	0.003	0.003	0.003	0.003	0.003	0.003	0.003	0.003	0.003	0.003	0.003	0.003
OR4Q2P	OR4Q2P	1	chr14:20470321-20471252		95.4271	0.003	0.003	0.0197457	1.11938	0.003		0.003	0.003	0.003	0.003	0.003	0.003	0.003	0.003	0.003	0.003	0.003	0.003	0.003	0.003	0.003	0.003
OR4U1P	OR4U1P	1	chr14:20512074-20513014	olfactory receptor, family 4, subfamily U, member 1 pseudogene	2.42615	0.003	0.003	0.003	0.0201138	0.003	0.003	0.003	0.003	0.003	0.003	0.003	0.003	0.003	0.003	0.003	0.003	0.003	0.003	0.003	0.003	0.003	0.003
OR4T1P	OR4T1P	1	chr14:20561513-20562434	olfactory receptor, family 4, subfamily T, member 1 pseudogene	1	0.003	0.003	0.003	0.003	0.003	0.003	0.003	0.003	0.003	0.003	0.003	0.003	0.003	0.003	0.003	0.003	0.003	0.003	0.003	0.003	0.003	0.003
OR11G1P	OR11G1P	1	chr14:20647386-20648337	olfactory receptor, family 11, subfamily G, member 1 pseudogene	2.40247	0.003	0.003	0.003	0.0198297	0.003	0.003	0.003	0.003	0.003	0.003	0.003	0.003	0.003	0.003	0.003	0.003	0.003	0.003	0.003	0.003	0.003	0.003
OR11P1P	OR11P1P	1	chr14:20652083-20652457	olfactory receptor, family 11, subfamily P, member 1 pseudogene	1	0.003	0.003	0.003	0.003	0.003		0.003	0.003	0.003	0.003	0.003	0.003	0.003	0.003	0.003	0.003	0.003	0.003	0.003	0.003	0.003	0.003
OR11H5P	OR11H5P	1	chr14:20677455-20678354	olfactory receptor, family 11, subfamily H, member 5 pseudogene	43.1461	0.003	0.173996	0.16494	0.0849934	0.0938233	0.003	0.003	0.003	0.003	0.003	0.003	0.003	0.003	0.003	0.003	0.003	0.003	0.003	0.003	0.003	0.003	0.003
OR11H7P	OR11H7P	1	chr14:20697560-20698502		4.04108	0.0671661	0.218412	0.467108	0.240738	0.159437		0.003	0.195349	0.0737792	0.171376	0.003	0.003	0.003	0.003	0.0988837	0.003	0.257825	0.0189568	0.003	0.0958653	0.138622	0.003
OR10G1P	OR10G1P	1	chr14:22070034-22070976	olfactory receptor, family 10, subfamily G, member 1 pseudogene	8.85952	0.003	0.003	0.0973143	0.003	0.003		0.003	0.003	0.003	0.003	0.003	0.003	0.003	0.003	0.003	0.003	0.003	0.003	0.003	0.003	0.003	0.003
OR4E1P	OR4E1P	1	chr14:22138203-22139150		66.3589	0.003	0.003	0.0193369	0.597962	0.176008		0.003	0.003	0.003	0.003	0.003	0.003	0.003	0.003	0.003	0.003	0.003	0.003	0.003	0.003	0.003	0.003
OR6E1P	OR6E1P	1	chr14:23171351-23172277	olfactory receptor, family 6, subfamily E, member 1 pseudogene	0.875154	0.125318	0.003	0.0993853	0.245848	0.0904586	0.003	0.022583	0.0443757	0.276536	0.0437961	0.0415756	0.003	0.003	0.003	0.181947	0.337679	0.405469	0.174403	0.003	0.117595	0.344136	0.003
OR7K1P	OR7K1P	1	chr14:25826969-25827973	olfactory receptor, family 7, subfamily K, member 1 pseudogene	1	0.003	0.003	0.003	0.003	0.003	0.003	0.003	0.003	0.003	0.003	0.003	0.003	0.003	0.003	0.003	0.003	0.003	0.003	0.003	0.003	0.003	0.003
OR7E105P	OR7E105P	1	chr14:52223707-52224703	olfactory receptor, family 7, subfamily E, member 105 pseudogene	3.66888	0.00709119	0.0605737	0.003	0.0374932	0.003	0.003	0.003	0.0105704	0.0207248	0.00544296	0.003	0.003	0.003	0.003	0.003	0.003	0.0070548	0.003	0.003	0.0178623	0.0218038	0.003
OR7E106P	OR7E106P	1	chr14:52229811-52230758	olfactory receptor, family 7, subfamily E, member 106 pseudogene	1.22772	0.00995021	0.003	0.003	0.0398642	0.003	0.0311197	0.003	0.003	0.0044783	0.003	0.003	0.003	0.003	0.003	0.003	0.0205068	0.003	0.003	0.003	0.0952183	0.003	0.003
OR7E159P	OR7E159P	1	chr14:52238505-52238814	olfactory receptor, family 7, subfamily E, member 159 pseudogene	1	0.003	0.003	0.003	0.003	0.003		0.003	0.003	0.003	0.003	0.003	0.003	0.003	0.003	0.003	0.003	0.003	0.003	0.003	0.003	0.003	0.003
OR4F14P	OR4F14P	1	chr15:102368943-102369879	olfactory receptor, family 4, subfamily F, member 14 pseudogene	9.17467	0.003	0.003	0.003	0.101096	0.003	0.003	0.003	0.003	0.003	0.003	0.003	0.003	0.003	0.003	0.003	0.003	0.003	0.003	0.003	0.003	0.003	0.003
OR4F13P	OR4F13P	1	chr15:102388847-102389784	olfactory receptor, family 4, subfamily F, member 13 pseudogene	1	0.003	0.003	0.003	0.003	0.003	0.003	0.003	0.003	0.003	0.003	0.003	0.003	0.003	0.003	0.003	0.003	0.003	0.003	0.003	0.003	0.003	0.003
OR4F28P	OR4F28P	1	chr15:102416166-102417101	olfactory receptor, family 4, subfamily F, member 28 pseudogene	2.33418	0.00346706	0.00612539	0.003	0.0202456	0.003	0.003	0.003	0.00486976	0.003	0.003	0.003	0.003	0.003	0.003	0.003	0.003	0.003	0.003	0.003	0.00860319	0.003	0.003
OR4G2P	OR4G2P	1	chr15:102466974-102467844	olfactory receptor, family 4, subfamily G, member 2 pseudogene	9.23336	0.003	0.0605376	0.003	0.0442627	0.003	0.003	0.003	0.003	0.003	0.003	0.003	0.003	0.003	0.003	0.003	0.003	0.003	0.003	0.003	0.003	0.003	0.003
OR4G6P	OR4G6P	1	chr15:102477752-102478696	olfactory receptor, family 4, subfamily G, member 6 pseudogene	1	0.003	0.003	0.003	0.003	0.003		0.003	0.003	0.003	0.003	0.003	0.003	0.003	0.003	0.003	0.003	0.003	0.003	0.003	0.003	0.003	0.003
OR11J2P	OR11J2P	1	chr15:21165989-21166935	olfactory receptor, family 11, subfamily J, member 2 pseudogene	1	0.003	0.003	0.003	0.003	0.003	0.003	0.003	0.003	0.003	0.003	0.003	0.003	0.003	0.003	0.003	0.003	0.003	0.003	0.003	0.003	0.003	0.003
OR11J5P	OR11J5P	1	chr15:21174578-21175538	olfactory receptor, family 11, subfamily J, member 5 pseudogene	1	0.003	0.003	0.003	0.003	0.003	0.003	0.003	0.003	0.003	0.003	0.003	0.003	0.003	0.003	0.003	0.003	0.003	0.003	0.003	0.003	0.003	0.003
OR11J7P	OR11J7P	1	chr15:22177218-22178164	olfactory receptor, family 11, subfamily J, member 7 pseudogene	1	0.003	0.003	0.003	0.003	0.003		0.003	0.003	0.003	0.003	0.003	0.003	0.003	0.003	0.003	0.003	0.003	0.003	0.003	0.003	0.003	0.003
OR11J6P	OR11J6P	1	chr15:22185809-22186769	olfactory receptor, family 11, subfamily J, member 6 pseudogene	1	0.003	0.003	0.003	0.003	0.003	0.003	0.003	0.003	0.003	0.003	0.003	0.003	0.003	0.003	0.003	0.003	0.003	0.003	0.003	0.003	0.003	0.003
OR11J1P	OR11J1P	1	chr15:22268236-22269196	olfactory receptor, family 11, subfamily J, member 1 pseudogene	1	0.003	0.003	0.003	0.003	0.003		0.003	0.003	0.003	0.003	0.003	0.003	0.003	0.003	0.003	0.003	0.003	0.003	0.003	0.003	0.003	0.003
OR11H3P	OR11H3P	1	chr15:22297500-22298447	olfactory receptor, family 11, subfamily H, member 3 pseudogene	0.2692	0.0111441	0.003	0.003	0.003	0.003	0.003	0.003	0.003	0.003	0.003	0.003	0.003	0.003	0.003	0.003	0.003	0.003	0.003	0.003	0.133306	0.003	0.003
OR11K1P	OR11K1P	1	chr15:22318853-22319782	olfactory receptor, family 11, subfamily K, member 1 pseudogene	0.0223448	0.134259	0.003	0.003	0.003	0.003	0.003	0.003	0.003	0.0250353	0.003	0.003	0.003	0.003	0.003	0.003	0.003	0.003	0.003	0.272331	1.81178	0.003	0.003
OR4Q1P	OR4Q1P	1	chr15:22332367-22333348	olfactory receptor, family 4, subfamily Q, member 1 pseudogene	0.530277	0.0132451	0.003	0.003	0.0190942	0.003	0.003	0.003	0.003	0.003	0.003	0.003	0.0199159	0.003	0.003	0.003	0.003	0.003	0.003	0.003	0.150005	0.003	0.003
OR4H6P	OR4H6P	1	chr15:22344659-22345590	olfactory receptor, family 4, subfamily H, member 6 pseudogene	0.455405	0.00658755	0.003	0.003	0.003	0.003		0.003	0.003	0.003	0.003	0.003	0.003	0.003	0.003	0.003	0.003	0.0604008	0.003	0.003	0.003	0.003	0.003
OR4N3P	OR4N3P	1	chr15:22413461-22414382	olfactory receptor, family 4, subfamily N, member 3 pseudogene	0.108611	0.0681887	0.003	0.003	0.0206241	0.003	0.0628195	0.003	0.003	0.003	0.003	0.003	0.003	0.003	0.003	0.003	0.003	0.003	0.003	0.003	1.04602	0.003	0.003
OR1F2P	OR1F2P	1	chr16:3265565-3266546	olfactory receptor, family 1, subfamily F, member 2	0.163739	0.0665942	0.003	0.018522	0.0190942	0.003	0.003	0.003	0.0824523	0.070066	0.003	0.003	0.003	0.003	0.003	0.003	0.003	0.003	0.003	0.003	0.873989	0.003	0.003
OR1E3P	OR1E3P	1	chr17:3019720-3020697		1	0.003	0.003	0.003	0.003	0.003		0.003	0.003	0.003	0.003	0.003	0.003	0.003	0.003	0.003	0.003	0.003	0.003	0.003	0.003	0.003	0.003
OR1P1P	OR1P1P	1	chr17:3057186-3058146		0.733154	0.00409191	0.003	0.003	0.003	0.003		0.003	0.003	0.003	0.003	0.003	0.0204706	0.003	0.003	0.003	0.003	0.003	0.003	0.003	0.003	0.003	0.003
OR1D3P	OR1D3P	1	chr17:3168904-3169856	olfactory receptor, family 1, subfamily D, member 3 pseudogene	1.39097	0.005177	0.003	0.003	0.0198043	0.003		0.003	0.003	0.003	0.003	0.003	0.003	0.003	0.003	0.003	0.003	0.003	0.003	0.003	0.037832	0.003	0.003
OR1R1P	OR1R1P	1	chr17:3289223-3290165	olfactory receptor, family 1, subfamily R, member 1 pseudogene	0.594305	0.011238	0.003	0.003	0.003	0.0177152	0.003	0.003	0.003	0.003	0.003	0.003	0.0419426	0.003	0.003	0.003	0.003	0.003	0.003	0.003	0.0958653	0.003	0.003
OR4K7P	OR4K7P	1	chr18:14570842-14571775	olfactory receptor, family 4, subfamily K, member 7 pseudogene	2.24376	0.003	0.003	0.003	0.003	0.0179251		0.003	0.003	0.003	0.003	0.003	0.003	0.003	0.003	0.003	0.003	0.003	0.003	0.003	0.003	0.003	0.003
OR4K8P	OR4K8P	1	chr18:14613208-14614162	olfactory receptor, family 4, subfamily K, member 8 pseudogene	1	0.003	0.003	0.003	0.003	0.003		0.003	0.003	0.003	0.003	0.003	0.003	0.003	0.003	0.003	0.003	0.003	0.003	0.003	0.003	0.003	0.003
OR4G1P	OR4G1P	1	chr19:104600-105469	olfactory receptor, family 4, subfamily G, member 1 pseudogene	159.878	0.003	0.545662	0.258093	0.99734	0.117442		0.003	0.003	0.003	0.003	0.003	0.003	0.003	0.003	0.003	0.003	0.003	0.003	0.003	0.003	0.003	0.003
OR7A8P	OR7A8P	1	chr19:14962846-14963756	olfactory receptor, family 7, subfamily A, member 8 pseudogene	4.24002	0.00808517	0.0570904	0.0406186	0.0209316	0.0184845		0.003	0.003	0.003	0.003	0.003	0.0438493	0.0435134	0.003	0.003	0.003	0.003	0.003	0.003	0.003	0.003	0.003
OR7A2P	OR7A2P	1	chr19:14974600-14975584	olfactory receptor, family 7, subfamily A, member 2 pseudogene	19.6683	0.0108263	0.413196	0.295255	0.0760947	0.0671907	0.003	0.003	0.003	0.003	0.0405308	0.003	0.003	0.003	0.003	0.003	0.003	0.003	0.003	0.003	0.0906895	0.003	0.003
OR7A18P	OR7A18P	1	chr19:14997657-14998084	olfactory receptor, family 7, subfamily A, member 18 pseudogene	1	0.003	0.003	0.003	0.003	0.003		0.003	0.003	0.003	0.003	0.003	0.003	0.003	0.003	0.003	0.003	0.003	0.003	0.003	0.003	0.003	0.003
OR7A1P	OR7A1P	1	chr19:15002670-15003616	olfactory receptor, family 7, subfamily A, member 1 pseudogene	34.4115	0.003	0.162922	0.154896	0.0598735	0.0352471		0.003	0.003	0.003	0.003	0.003	0.003	0.003	0.003	0.003	0.003	0.003	0.003	0.003	0.003	0.003	0.003
OR7A3P	OR7A3P	1	chr19:15014053-15014985	olfactory receptor, family 7, subfamily A, member 3 pseudogene	2.39331	0.003	0.003	0.0197197	0.003	0.003		0.003	0.003	0.003	0.003	0.003	0.003	0.003	0.003	0.003	0.003	0.003	0.003	0.003	0.003	0.003	0.003
OR7A11P	OR7A11P	1	chr19:15027194-15028213	olfactory receptor, family 7, subfamily A, member 11 pseudogene	1	0.003	0.003	0.003	0.003	0.003		0.003	0.003	0.003	0.003	0.003	0.003	0.003	0.003	0.003	0.003	0.003	0.003	0.003	0.003	0.003	0.003
OR7A15P	OR7A15P	1	chr19:15037863-15038869	olfactory receptor, family 7, subfamily A, member 15 pseudogene	6.98945	0.00391494	0.100453	0.003	0.003	0.003	0.003	0.003	0.003	0.003	0.003	0.003	0.003	0.003	0.003	0.003	0.003	0.003	0.003	0.003	0.017639	0.003	0.003
OR10B1P	OR10B1P	1	chr19:15251918-15252819	olfactory receptor, family 10, subfamily B, member 1 pseudogene	8.34019	0.00535053	0.115663	0.0411216	0.003	0.0187131		0.003	0.003	0.003	0.003	0.003	0.003	0.003	0.003	0.003	0.003	0.003	0.003	0.003	0.0406085	0.003	0.003
OR4F8P	OR4F8P	1	chr19:156281-157216	olfactory receptor, family 4, subfamily F, member 8 pseudogene	1.0218	0.00830635	0.00612539	0.0218244	0.003	0.003		0.003	0.00486976	0.003	0.003	0.003	0.003	0.003	0.003	0.003	0.003	0.003	0.003	0.003	0.0860319	0.003	0.003
OR1AB1P	OR1AB1P	1	chr19:16162786-16163525	olfactory receptor, family 1, subfamily AB, member 1 pseudogene	0.671548	0.00446729	0.003	0.003	0.003	0.003		0.003	0.003	0.003	0.003	0.003	0.003	0.003	0.003	0.003	0.003	0.003	0.003	0.003	0.0264766	0.003	0.003
OR5AH1P	OR5AH1P	1	chr19:57272231-57272600	olfactory receptor, family 5, subfamily AH, member 1 pseudogene	0.722787	0.0301855	0.003	0.003	0.0782708	0.003		0.003	0.003	0.003	0.003	0.003	0.003	0.003	0.003	0.003	0.003	0.268148	0.003	0.003	0.17282	0.003	0.003
OR1M4P	OR1M4P	1	chr19:9193611-9194074	olfactory receptor, family 1, subfamily M, member 4 pseudogene	13.8322	0.003	0.156986	0.003	0.003	0.003		0.003	0.003	0.003	0.003	0.003	0.003	0.003	0.003	0.003	0.003	0.003	0.003	0.003	0.003	0.003	0.003
OR7G15P	OR7G15P	1	chr19:9232759-9233163	olfactory receptor, family 7, subfamily G, member 15 pseudogene	1	0.003	0.003	0.003	0.003	0.003		0.003	0.003	0.003	0.003	0.003	0.003	0.003	0.003	0.003	0.003	0.003	0.003	0.003	0.003	0.003	0.003
OR7E16P	OR7E16P	1	chr19:9301911-9302831	olfactory receptor, family 7, subfamily E, member 16 pseudogene	1	0.003	0.003	0.003	0.003	0.003		0.003	0.003	0.003	0.003	0.003	0.003	0.003	0.003	0.003	0.003	0.003	0.003	0.003	0.003	0.003	0.003
OR7E25P	OR7E25P	1	chr19:9314927-9315908	olfactory receptor, family 7, subfamily E, member 25 pseudogene	140.076	0.003	1.037	0.500095	0.0763769	0.0674402	0.003	0.003	0.003	0.003	0.003	0.003	0.003	0.003	0.003	0.003	0.003	0.003	0.003	0.003	0.003	0.003	0.003
OR7D1P	OR7D1P	1	chr19:9345819-9346752	olfactory receptor, family 7, subfamily D, member 1 pseudogene	57.1925	0.003	0.331683	0.118162	0.18269	0.0537752	0.003	0.003	0.003	0.003	0.003	0.003	0.003	0.003	0.003	0.003	0.003	0.003	0.003	0.003	0.003	0.003	0.003
OR7E18P	OR7E18P	1	chr19:9371652-9372473	olfactory receptor, family 7, subfamily E, member 18 pseudogene	0.780406	0.0257584	0.003	0.003	0.071408	0.003	0.003	0.003	0.003	0.003	0.003	0.003	0.003	0.003	0.003	0.003	0.003	0.003	0.003	0.003	0.367134	0.003	0.003
OR7E19P	OR7E19P	1	chr19:9376068-9377045	olfactory receptor, family 7, subfamily E, member 19 pseudogene	0.201489	0.177831	0.003	0.003	0.134324	0.003	0.003	0.003	0.003	0.003	0.003	0.003	0.003	0.003	0.003	0.003	0.003	0.003	0.003	0.003	2.8003	0.003	0.003
OR7H1P	OR7H1P	1	chr19:9389108-9390045	olfactory receptor, family 7, subfamily H, member 1 pseudogene	2.44186	0.0112581	0.003	0.003	0.100963	0.003	0.003	0.003	0.003	0.003	0.003	0.003	0.003	0.003	0.003	0.003	0.003	0.003	0.003	0.003	0.13513	0.003	0.003
OR4G3P	OR4G3P	1	chr19:94061-95005	olfactory receptor, family 4, subfamily G, member 3 pseudogene	1	0.003	0.003	0.003	0.003	0.003		0.003	0.003	0.003	0.003	0.003	0.003	0.003	0.003	0.003	0.003	0.003	0.003	0.003	0.003	0.003	0.003
OR7E89P	OR7E89P	1	chr2:159710061-159711085	olfactory receptor, family 7, subfamily E, member 89 pseudogene	4.74507	0.0096708	0.0982382	0.0351696	0.0181304	0.0320161	0.123594	0.003	0.003	0.003	0.0770972	0.003	0.003	0.003	0.003	0.003	0.003	0.003	0.003	0.003	0.003	0.0356356	0.003
OR7E28P	OR7E28P	1	chr2:159718856-159719803	olfactory receptor, family 7, subfamily E, member 28 pseudogene	4.38264	0.071089	0.200665	0.174032	0.378709	0.492822	0.63953	0.0109714	0.0166592	0.0289054	0.580164	0.0225551	0.0229128	0.149859	0.0262802	0.00997046	0.0184561	0.0072229	0.037943	0.003	0.103471	0.0960529	0.003
OR7E90P	OR7E90P	1	chr2:159731150-159732179	olfactory receptor, family 7, subfamily E, member 90 pseudogene	0.123411	0.024309	0.003	0.003	0.003	0.003	0.0462249	0.003	0.003	0.003	0.0383144	0.003	0.003	0.003	0.003	0.003	0.003	0.003	0.003	0.003	0.308629	0.003	0.003
OR9S24P	OR9S24P	1	chr2:241018849-241019777	olfactory receptor, family 9, subfamily S, member 24 pseudogene	0.985875	0.00304298	0.003	0.003	0.003	0.003	0.003	0.003	0.00368773	0.003	0.003	0.003	0.003	0.003	0.003	0.003	0.003	0.003	0.003	0.003	0.003	0.003	0.003
OR5S1P	OR5S1P	1	chr2:241048518-241049466	olfactory receptor, family 5, subfamily S, member 1 pseudogene	1.13298	0.00637838	0.003	0.003	0.0199064	0.003	0.003	0.003	0.003	0.003	0.003	0.003	0.003	0.003	0.003	0.003	0.003	0.003	0.003	0.003	0.057054	0.003	0.003
OR7E91P	OR7E91P	1	chr2:71256001-71257026	olfactory receptor, family 7, subfamily E, member 91 pseudogene	1.69902	0.0860621	0.147177	0.21077	0.162982	0.063957		0.0794114	0.003	0.003	0.003	0.003	0.003	0.168313	0.003	0.003	0.003	0.003	1.09027	0.003	0.003	0.003	0.003
OR7E46P	OR7E46P	1	chr2:71264850-71265795	olfactory receptor, family 7, subfamily E, member 46 pseudogene	0.469274	0.00639285	0.003	0.003	0.003	0.003	0.003	0.003	0.003	0.003	0.003	0.003	0.003	0.003	0.003	0.003	0.003	0.003	0.003	0.003	0.0572856	0.003	0.003
OR7E62P	OR7E62P	1	chr2:71282267-71283288	olfactory receptor, family 7, subfamily E, member 62 pseudogene	1.68248	0.0335652	0.0493002	0.0352942	0.109167	0.0321293	3.1002	0.0598509	0.0588038	0.003	0.0193453	0.003	0.003	0.093966	0.003	0.003	0.003	0.003	0.171191	0.003	0.103886	0.003	0.003
OR7E102P	OR7E102P	1	chr2:96212325-96213321	olfactory receptor, family 7, subfamily E, member 102 pseudogene	1.92853	0.0852854	0.203454	0.0727358	0.149973	0.231738	0.0470236	0.003	0.003	0.0229118	0.0798301	0.003	0.003	0.0775519	0.003	0.003	0.003	0.003	0.247252	0.003	0.003	0.90402	0.003
OR4K11P	OR4K11P	1	chr21:14916551-14917506	olfactory receptor, family 4, subfamily K, member 11 pseudogene	1	0.003	0.003	0.003	0.003	0.003	0.003	0.003	0.003	0.003	0.003	0.003	0.003	0.003	0.003	0.003	0.003	0.003	0.003	0.003	0.003	0.003	0.003
OR4K12P	OR4K12P	1	chr21:14953392-14954325	olfactory receptor, family 4, subfamily K, member 12 pseudogene	1	0.003	0.003	0.003	0.003	0.003	0.003	0.003	0.003	0.003	0.003	0.003	0.003	0.003	0.003	0.003	0.003	0.003	0.003	0.003	0.003	0.003	0.003
OR7E23P	OR7E23P	1	chr21:33993370-33994353	olfactory receptor, family 7, subfamily E, member 23 pseudogene	2.33726	0.003	0.003	0.003	0.0190471	0.003	0.003	0.003	0.003	0.003	0.003	0.003	0.003	0.003	0.003	0.003	0.003	0.003	0.003	0.003	0.003	0.003	0.003
OR7E100P	OR7E100P	1	chr3:112243032-112244047	olfactory receptor, family 7, subfamily E, member 100 pseudogene	0.326574	0.0322262	0.003	0.017773	0.018324	0.003	0.003	0.003	0.0789867	0.0223737	0.003	0.003	0.003	0.0757304	0.003	0.003	0.003	0.270643	0.003	0.003	0.0348856	0.003	0.003
OR7E130P	OR7E130P	1	chr3:125422218-125423181	olfactory receptor, family 7, subfamily E, member 130 pseudogene	3.60526	0.0111084	0.116305	0.0378894	0.003	0.003	0.0181211	0.003	0.0110313	0.0240194	0.00568026	0.003	0.003	0.003	0.003	0.0961403	0.003	0.00736238	0.003	0.003	0.003	0.00350068	0.003
OR7E29P	OR7E29P	1	chr3:125430968-125431913	olfactory receptor, family 7, subfamily E, member 29 pseudogene	2.10086	0.0703341	0.0543809	0.13571	0.259788	0.141171	0.140243	0.0660068	0.003	0.0979728	0.021335	0.003	0.003	0.003	0.279014	0.003	0.003	0.138265	0.0755193	0.003	0.324619	0.0986139	0.003
OR7E93P	OR7E93P	1	chr3:125443322-125444357	olfactory receptor, family 7, subfamily E, member 93 pseudogene	1	0.003	0.003	0.003	0.003	0.003	0.003	0.003	0.003	0.003	0.003	0.003	0.003	0.003	0.003	0.003	0.003	0.003	0.003	0.003	0.003	0.003	0.003
OR7E53P	OR7E53P	1	chr3:125453078-125454087	olfactory receptor, family 7, subfamily E, member 53 pseudogene	1	0.003	0.003	0.003	0.003	0.003	0.0917775	0.003	0.003	0.003	0.003	0.003	0.003	0.003	0.003	0.003	0.003	0.003	0.003	0.003	0.003	0.003	0.003
OR7E97P	OR7E97P	1	chr3:125465917-125466952	olfactory receptor, family 7, subfamily E, member 97 pseudogene	1	0.003	0.003	0.003	0.003	0.003	0.003	0.003	0.003	0.003	0.003	0.003	0.003	0.003	0.003	0.003	0.003	0.003	0.003	0.003	0.003	0.003	0.003
OR7E129P	OR7E129P	1	chr3:129740398-129741423	olfactory receptor, family 7, subfamily E, member 129 pseudogene	1.04747	0.00785942	0.00936581	0.0175641	0.003	0.003	0.003	0.003	0.0101961	0.0179817	0.00525021	0.003	0.003	0.003	0.003	0.003	0.003	0.0246275	0.003	0.003	0.0344596	0.00323564	0.003
OR7E21P	OR7E21P	1	chr3:129753331-129754385	olfactory receptor, family 7, subfamily E, member 21 pseudogene	4.10299	0.00978617	0.15161	0.003	0.003	0.003	0.0324771	0.00958693	0.014557	0.00391317	0.0123949	0.0197088	0.0182012	0.00451544	0.0168852	0.00871226	0.003	0.003	0.0137107	0.003	0.00721088	0.0151822	0.003
OR7E66P	OR7E66P	1	chr3:75396997-75397914	olfactory receptor, family 7, subfamily E, member 66 pseudogene	1.8827	0.010686	0.003	0.0201179	0.0207349	0.0366212	0.533413	0.0114344	0.003	0.00466728	0.0110876	0.0147357	0.00615082	0.003	0.003	0.0428056	0.003	0.003	0.003	0.003	0.0396946	0.0163997	0.003
OR7E22P	OR7E22P	1	chr3:75405635-75406661	olfactory receptor, family 7, subfamily E, member 22 pseudogene	6.67138	0.0953358	0.440991	0.473675	0.95866	0.670761	1.28351	0.0396573	0.003	0.154514	0.192273	0.003	0.003	0.003	0.003	0.514768	0.003	0.409418	0.136117	0.003	0.0516263	0.003	0.003
OR7E55P	OR7E55P	1	chr3:75419563-75420514	olfactory receptor, family 7, subfamily E, member 55 pseudogene	0.606157	0.0170604	0.0323652	0.003	0.003	0.003	0.0116607	0.003	0.0107216	0.003	0.0162251	0.00837089	0.0542119	0.0051398	0.0261391	0.086292	0.018357	0.00718412	0.0190115	0.003	0.0063138	0.003	0.003
OR7E121P	OR7E121P	1	chr3:75647801-75648824	olfactory receptor, family 7, subfamily E, member 121 pseudogene	0.313648	0.00956487	0.003	0.003	0.003	0.003	0.329184	0.003	0.00651776	0.00984647	0.003	0.003	0.003	0.003	0.003	0.003	0.003	0.003	0.0910782	0.003	0.00959554	0.003	0.003
OR7E122P	OR7E122P	1	chr3:8729919-8730840	olfactory receptor, family 7, subfamily E, member 122 pseudogene	32.9523	0.0384214	0.224841	0.460233	3.34111	1.03812	0.003	0.003	0.003	0.0506309	0.110256	0.003	0.003	0.003	0.003	0.003	0.003	0.102076	0.003	0.003	0.31578	0.003	0.003
OR5BM1P	OR5BM1P	1	chr3:97771736-97772662	olfactory receptor, family 5, subfamily BM, member 1 pseudogene	1	0.003	0.003	0.003	0.003	0.003		0.003	0.003	0.003	0.003	0.003	0.003	0.003	0.003	0.003	0.003	0.003	0.003	0.003	0.003	0.003	0.003
OR5AC1P	OR5AC1P	1	chr3:97783315-97784237		29.7117	0.003	0.0561316	0.199834	0.0823864	0.0181883		0.003	0.003	0.003	0.003	0.003	0.003	0.003	0.003	0.003	0.003	0.003	0.003	0.003	0.003	0.003	0.003
OR5AC4P	OR5AC4P	1	chr3:97823597-97824513	olfactory receptor, family 5, subfamily AC, member 4 pseudogene	1.71263	0.0289443	0.0566069	0.0402901	0.083051	0.0183352	0.0533718	0.003	0.003	0.003	0.003	0.003	0.0434787	0.003	0.003	0.003	0.003	0.003	0.003	0.003	0.37763	0.003	0.003
OR5H5P	OR5H5P	1	chr3:97916054-97916979	olfactory receptor, family 5, subfamily H, member 5 pseudogene	0.171113	0.0175323	0.003	0.003	0.003	0.003	0.003	0.003	0.003	0.003	0.003	0.003	0.003	0.003	0.003	0.003	0.003	0.003	0.003	0.003	0.235517	0.003	0.003
OR5H3P	OR5H3P	1	chr3:97926266-97927182	olfactory receptor, family 5, subfamily H, member 3 pseudogene	17.3977	0.003	0.003	0.003	0.166102	0.0366705	0.003	0.003	0.003	0.003	0.003	0.003	0.003	0.003	0.003	0.003	0.003	0.003	0.003	0.003	0.003	0.003	0.003
OR5H4P	OR5H4P	1	chr3:97940887-97941837	olfactory receptor, family 5, subfamily H, member 4 pseudogene	1	0.003	0.003	0.003	0.003	0.003	0.003	0.003	0.003	0.003	0.003	0.003	0.003	0.003	0.003	0.003	0.003	0.003	0.003	0.003	0.003	0.003	0.003
OR5H7P	OR5H7P	1	chr3:97957195-97958122	olfactory receptor, family 5, subfamily H, member 7 pseudogene	1.92527	0.00648225	0.003	0.003	0.0409204	0.003	0.003	0.003	0.003	0.003	0.003	0.003	0.003	0.003	0.003	0.003	0.003	0.003	0.003	0.003	0.058716	0.003	0.003
OR5H8P	OR5H8P	1	chr3:98030756-98031684	olfactory receptor, family 5, subfamily H, member 8 pseudogene	1.69507	0.0211491	0.0556641	0.003	0.0817325	0.003	0.157459	0.003	0.003	0.003	0.003	0.003	0.003	0.003	0.003	0.003	0.003	0.003	0.003	0.003	0.195449	0.100936	0.003
OR7E163P	OR7E163P	1	chr4:3891029-3892054	olfactory receptor, family 7, subfamily E, member 163, pseudogene	4.37917	0.00635223	0.00445991	0.0878207	0.003	0.0159892		0.003	0.0443308	0.0146667	0.003	0.003	0.003	0.003	0.003	0.003	0.003	0.00340249	0.003	0.003	0.003	0.00323564	0.003
OR7E162P	OR7E162P	1	chr4:3903232-3904267	olfactory receptor, family 7, subfamily E, member 162 pseudogene	0.882033	0.0121669	0.0339263	0.003	0.003	0.003		0.00980668	0.0148906	0.003	0.0240901	0.0201606	0.0167566	0.00461895	0.0234902	0.00891196	0.0164967	0.00645609	0.0170849	0.003	0.00737617	0.0155302	0.003
OR7E103P	OR7E103P	1	chr4:4128332-4129357		15.4999	0.003	0.098118	0.0175641	0.0543274	0.0159892		0.003	0.003	0.003	0.003	0.003	0.003	0.003	0.003	0.003	0.003	0.003	0.003	0.003	0.003	0.003	0.003
OR7E99P	OR7E99P	1	chr4:4158205-4159230	olfactory receptor, family 7, subfamily E, member 99 pseudogene	15.5751	0.0153219	0.249755	0.562053	0.126764	0.0159892	0.003	0.003	0.0101961	0.0199909	0.003	0.0182747	0.003	0.003	0.003	0.124406	0.003	0.0390476	0.003	0.003	0.003	0.00323564	0.003
OR5M14P	OR5M14P	1	chr4:41725226-41725580	olfactory receptor, family 5, subfamily M, member 14 pseudogene	1	0.003	0.003	0.003	0.003	0.003	0.0925105	0.003	0.003	0.003	0.003	0.003	0.003	0.003	0.003	0.003	0.003	0.003	0.003	0.003	0.003	0.003	0.003
OR7E43P	OR7E43P	1	chr4:4176047-4177017	olfactory receptor, family 7, subfamily E, member 43 pseudogene	1	0.003	0.003	0.003	0.003	0.003	0.003	0.003	0.003	0.003	0.003	0.003	0.003	0.003	0.003	0.003	0.003	0.003	0.003	0.003	0.003	0.003	0.003
OR7E94P	OR7E94P	1	chr4:80508264-80509282	olfactory receptor, family 7, subfamily E, member 94 pseudogene	0.181742	0.407104	0.0494827	0.0885493	0.109554	0.0483651	0.241968	0.0800961	0.609885	0.003	0.0194167	0.387078	0.0570248	0.169764	0.003	0.003	1.7965	0.003	0.051547	0.917956	0.382323	0.0538484	1.97623
OR7E86P	OR7E86P	1	chr4:9460947-9461970	olfactory receptor, family 7, subfamily E, member 86 pseudogene	3.47977	0.003	0.003	0.0176055	0.0181517	0.003	0.0242644	0.003	0.003	0.003	0.003	0.003	0.003	0.003	0.003	0.003	0.003	0.003	0.003	0.003	0.003	0.003	0.003
OR7E84P	OR7E84P	1	chr4:9470748-9471709	olfactory receptor, family 7, subfamily E, member 84 pseudogene	1.11215	0.0103984	0.0372583	0.003	0.003	0.003	0.0722883	0.003	0.0163503	0.00439525	0.0160102	0.00826001	0.0183991	0.00507172	0.0257928	0.00803292	0.0181138	0.00708895	0.0187597	0.003	0.00809922	0.003	0.003
OR7E85P	OR7E85P	1	chr4:9485349-9486377	olfactory receptor, family 7, subfamily E, member 85 pseudogene	0.425579	0.0361316	0.003	0.0525073	0.003	0.003	0.003	0.0197804	0.003	0.003	0.003	0.003	0.003	0.003	0.003	0.003	0.003	0.003	0.0509198	0.003	0.22317	0.248235	0.003
OR7E83P	OR7E83P	1	chr4:9514517-9515542	olfactory receptor, family 7, subfamily E, member 83 pseudogene	0.465845	0.0606532	0.003	0.0526924	0.0543274	0.003	0.0249009	0.003	0.00650184	0.0120325	0.003	0.003	0.003	0.003	0.003	0.003	0.003	0.003	0.0738203	0.003	0.578155	0.266941	0.003
OR7E35P	OR7E35P	1	chr4:9756515-9757429	olfactory receptor, family 7, subfamily E, member 35 pseudogene	7.16029	0.00409744	0.0567672	0.003	0.0208187	0.0367695	0.003	0.003	0.003	0.003	0.003	0.003	0.003	0.003	0.003	0.020559	0.003	0.003	0.003	0.003	0.003	0.003	0.003
OR7H2P	OR7H2P	1	chr5:101151586-101152484	olfactory receptor, family 7, subfamily H, member 2 pseudogene	1	0.003	0.003	0.003	0.003	0.003		0.003	0.003	0.003	0.003	0.003	0.003	0.003	0.003	0.003	0.003	0.003	0.003	0.003	0.003	0.003	0.003
OR1X1P	OR1X1P	1	chr5:175433147-175434392	olfactory receptor, family 1, subfamily X, member 1 pseudogene	0.526748	0.00569532	0.003	0.003	0.003	0.003		0.003	0.0461251	0.003	0.003	0.003	0.003	0.003	0.003	0.003	0.003	0.003	0.003	0.003	0.003	0.003	0.003
OR1X5P	OR1X5P	1	chr5:177263413-177264665	olfactory receptor, family 1, subfamily X, member 5 pseudogene	0.186727	0.0160662	0.003	0.003	0.003	0.003	0.0553155	0.003	0.0763607	0.003	0.003	0.003	0.003	0.003	0.003	0.0834905	0.058107	0.00310098	0.003	0.003	0.003	0.003	0.003
OR2AI1P	OR2AI1P	1	chr5:180119834-180120763	olfactory receptor, family 2, subfamily AI, member 1 pseudogene	152.303	0.003	0.333522	0.950307	0.489747	0.0540597	0.003	0.003	0.003	0.003	0.003	0.003	0.003	0.003	0.003	0.003	0.003	0.003	0.003	0.003	0.003	0.003	0.003
OR4F1P	OR4F1P	1	chr6:105921-106856	olfactory receptor, family 4, subfamily F, member 1 pseudogene	1.09065	0.00346706	0.00612539	0.003	0.003	0.003	0.003	0.003	0.00486976	0.003	0.003	0.003	0.003	0.003	0.003	0.003	0.003	0.003	0.003	0.003	0.00860319	0.003	0.003
OR4F7P	OR4F7P	1	chr6:170948693-170949616	olfactory receptor, family 4, subfamily F, member 7 pseudogene	1.09361	0.00348115	0.00622812	0.003	0.003	0.003	0.003	0.003	0.00495127	0.003	0.003	0.003	0.003	0.003	0.003	0.003	0.003	0.003	0.003	0.003	0.0087472	0.003	0.003
OR2W6P	OR2W6P	1	chr6:27905180-27906178	olfactory receptor, family 2, subfamily W, member 6 pseudogene	0.190755	0.015727	0.003	0.003	0.003	0.003	0.259562	0.003	0.0605117	0.003	0.003	0.003	0.003	0.003	0.003	0.003	0.134303	0.003	0.003	0.003	0.0178172	0.003	0.003
OR2W4P	OR2W4P	1	chr6:27944927-27945850	olfactory receptor, family 2, subfamily W, member 4 pseudogene	20.4881	0.003	0.112106	0.0199567	0.0411384	0.0726564	0.003	0.003	0.003	0.003	0.003	0.003	0.003	0.003	0.003	0.003	0.003	0.003	0.003	0.003	0.003	0.003	0.003
OR2W2P	OR2W2P	1	chr6:28001691-28002639	olfactory receptor, family 2, subfamily W, member 2 pseudogene	0.963267	0.00750217	0.003	0.003	0.0199064	0.003	0.003	0.003	0.003	0.003	0.003	0.003	0.003	0.003	0.003	0.003	0.003	0.0590168	0.003	0.003	0.019018	0.003	0.003
OR2B7P	OR2B7P	1	chr6:28014211-28015146	olfactory receptor, family 2, subfamily B, member 7 pseudogene	1.65337	0.0235047	0.003	0.0785677	0.0202456	0.053634	0.003	0.003	0.003	0.003	0.003	0.003	0.003	0.003	0.003	0.003	0.003	0.260301	0.0574165	0.003	0.0193572	0.003	0.003
OR2B8P	OR2B8P	1	chr6:28021008-28021958	olfactory receptor, family 2, subfamily B, member 8 pseudogene	5.22754	0.0199794	0.0540147	0.211884	0.099276	0.0525985	0.003	0.003	0.003	0.003	0.003	0.003	0.003	0.003	0.003	0.003	0.003	0.274671	0.003	0.003	0.003	0.003	0.003
OR2E1P	OR2E1P	1	chr6:28423414-28423888	olfactory receptor, family 2, subfamily E, member 1 pseudogene	62.6293	0.003	0.301011	0.149515	0.255768	0.0452581	0.003	0.003	0.003	0.003	0.003	0.003	0.003	0.003	0.003	0.003	0.003	0.003	0.003	0.003	0.003	0.003	0.003
OR2AD1P	OR2AD1P	1	chr6:28994432-28995384	olfactory receptor, family 2, subfamily AD, member 1 pseudogene	0.306127	0.00979986	0.003	0.003	0.003	0.003	0.003	0.003	0.003	0.003	0.003	0.003	0.003	0.003	0.003	0.003	0.003	0.0391336	0.003	0.003	0.0756641	0.003	0.003
OR2P1P	OR2P1P	1	chr6:29039608-29040343	olfactory receptor, family 2, subfamily P, member 1 pseudogene	1	0.003	0.003	0.003	0.003	0.003	0.003	0.003	0.003	0.003	0.003	0.003	0.003	0.003	0.003	0.003	0.003	0.003	0.003	0.003	0.003	0.003	0.003
OR2J1P	OR2J1P	1	chr6:29068725-29069655		31.3187	0.003	0.003	0.003	0.366825	0.003		0.003	0.003	0.003	0.003	0.003	0.003	0.003	0.003	0.003	0.003	0.003	0.003	0.003	0.003	0.003	0.003
OR2N1P	OR2N1P	1	chr6:29105659-29106593	olfactory receptor, family 2, subfamily N, member 1 pseudogene	37.4032	0.00523547	0.276022	0.413023	0.0405444	0.0537045	0.003	0.003	0.003	0.003	0.003	0.003	0.003	0.003	0.003	0.003	0.003	0.003	0.003	0.003	0.0387676	0.003	0.003
OR2J4P	OR2J4P	1	chr6:29149286-29150219	olfactory receptor, family 2, subfamily J, member 4 pseudogene	55.566	0.003	0.442244	0.0787748	0.0202988	0.125475	0.003	0.003	0.003	0.003	0.003	0.003	0.003	0.003	0.003	0.003	0.003	0.003	0.003	0.003	0.003	0.003	0.003
OR2H4P	OR2H4P	1	chr6:29183012-29183953	olfactory receptor, family 2, subfamily H, member 4 pseudogene	24.6943	0.003	0.0546775	0.0779529	0.160701	0.003	0.003	0.003	0.003	0.003	0.003	0.003	0.003	0.003	0.003	0.003	0.003	0.003	0.003	0.003	0.003	0.003	0.003
OR2G1P	OR2G1P	1	chr6:29197006-29197997	olfactory receptor, family 2, subfamily G, member 1 pseudogene	0.719282	0.00968366	0.003	0.003	0.0188611	0.003	0.003	0.003	0.003	0.0230578	0.003	0.003	0.003	0.003	0.003	0.003	0.003	0.003	0.003	0.003	0.0898807	0.003	0.003
OR2U1P	OR2U1P	1	chr6:29230435-29231856	olfactory receptor, family 2, subfamily U, member 1 pseudogene	0.255413	0.0117457	0.003	0.003	0.003	0.003	0.003	0.003	0.003	0.0297936	0.003	0.003	0.003	0.003	0.003	0.003	0.003	0.003	0.003	0.003	0.116137	0.003	0.003
OR2U2P	OR2U2P	1	chr6:29236253-29237198	olfactory receptor, family 2, subfamily U, member 2 pseudogene	0.659394	0.0109888	0.003	0.003	0.0199837	0.003	0.003	0.003	0.003	0.0979728	0.003	0.003	0.003	0.003	0.003	0.003	0.003	0.0197521	0.003	0.003	0.0190952	0.003	0.003
OR2B4P	OR2B4P	1	chr6:29258472-29259427	olfactory receptor, family 2, subfamily B, member 4 pseudogene	8.27476	0.0295352	0.214614	0.133972	0.61158	0.0174207	0.003	0.003	0.003	0.0483323	0.003	0.003	0.003	0.003	0.003	0.003	0.003	0.253349	0.003	0.003	0.131882	0.003	0.003
OR12D1P	OR12D1P	1	chr6:29385056-29385985		172.945	0.003	0.833804	0.475154	0.0816245	0.684757	0.003	0.003	0.003	0.003	0.003	0.003	0.003	0.003	0.003	0.003	0.003	0.003	0.003	0.003	0.003	0.003	0.003
OR2I1P	OR2I1P	1	chr6:29520965-29521937	olfactory receptor, family 2, subfamily I, member 1 pseudogene	2.0473	0.559475	0.419682	2.13533	1.58335	0.4433	0.105555	0.0636799	4.02507	0.0472595	0.102914	0.0195393	0.0604496	0.479892	0.003	0.855095	2.7574	0.0190558	0.418928	0.003	0.0552662	0.038055	0.003
OR2H5P	OR2H5P	1	chr6:29541673-29542610	olfactory receptor, family 2, subfamily H, member 5 pseudogene	0.247975	0.012098	0.003	0.003	0.003	0.003	0.003	0.003	0.003	0.148568	0.003	0.003	0.003	0.003	0.003	0.003	0.003	0.003	0.003	0.003	0.003	0.003	0.003
OR9A3P	OR9A3P	1	chr7:141562659-141563619	olfactory receptor, family 9, subfamily A, member 3 pseudogene	0.663401	0.0177246	0.003	0.038034	0.003	0.003	0.003	0.003	0.003	0.0240059	0.003	0.003	0.003	0.16251	0.003	0.003	0.003	0.0580774	0.003	0.003	0.003	0.003	0.003
OR9A1P	OR9A1P	1	chr7:141586947-141587889	olfactory receptor, family 9, subfamily A, member 1 pseudogene	0.341545	0.0195547	0.003	0.003	0.003	0.0177152	0.003	0.132552	0.003	0.0245931	0.003	0.003	0.003	0.003	0.11673	0.003	0.003	0.003	0.003	0.003	0.003	0.003	0.003
OR9N1P	OR9N1P	1	chr7:141611203-141611824	olfactory receptor, family 9, subfamily N, member 1 pseudogene	0.383228	0.0276896	0.003	0.0334458	0.003	0.003	0.003	0.003	0.003	0.003	0.189976	0.003	0.003	0.003	0.003	0.003	0.003	0.211058	0.003	0.003	0.003	0.003	0.003
OR9P1P	OR9P1P	1	chr7:142744166-142744872	olfactory receptor, family 9, subfamily P, member 1 pseudogene	0.252882	0.0118633	0.003	0.003	0.003	0.003	0.003	0.003	0.003	0.144812	0.003	0.003	0.003	0.003	0.003	0.003	0.003	0.003	0.003	0.003	0.003	0.003	0.003
OR6W1P	OR6W1P	1	chr7:142759589-142760531	olfactory receptor, family 6, subfamily W, member 1 pseudogene	9.24923	0.00588663	0.003	0.0389257	0.140431	0.0354305	0.003	0.003	0.003	0.0491861	0.003	0.003	0.003	0.003	0.003	0.003	0.003	0.003	0.003	0.003	0.003	0.003	0.003
OR2R1P	OR2R1P	1	chr7:143185557-143186504	olfactory receptor, family 2, subfamily R, member 1, pseudogene	0.189616	0.0158215	0.003	0.003	0.003	0.003	0.003	0.003	0.021559	0.0244271	0.003	0.003	0.003	0.003	0.003	0.003	0.003	0.003	0.003	0.003	0.0761747	0.003	0.0949828
OR10AC1P	OR10AC1P	1	chr7:143208049-143209004	olfactory receptor, family 10, subfamily AC, member 1 pseudogene	16.155	0.00833367	0.107307	0.0574164	0.217012	0.156786	0.003	0.003	0.003	0.0724985	0.003	0.003	0.003	0.003	0.003	0.003	0.003	0.003	0.003	0.003	0.0188402	0.003	0.003
OR2Q1P	OR2Q1P	1	chr7:143677997-143678925	olfactory receptor, family 2, subfamily Q, member 1 pseudogene	1	0.003	0.003	0.003	0.003	0.003	0.003	0.003	0.003	0.003	0.003	0.003	0.003	0.003	0.003	0.003	0.003	0.003	0.003	0.003	0.003	0.003	0.003
OR2A41P	OR2A41P	1	chr7:143774485-143774947	olfactory receptor, family 2, subfamily A, member 41 pseudogene	0.450273	0.00666263	0.003	0.003	0.003	0.003		0.003	0.003	0.003	0.061602	0.003	0.003	0.003	0.003	0.003	0.003	0.003	0.003	0.003	0.003	0.003	0.003
OR2A15P	OR2A15P	1	chr7:143815556-143816453	olfactory receptor, family 2, subfamily A, member 15 pseudogene	2.52558	0.003	0.003	0.003	0.021307	0.003	0.003	0.003	0.003	0.003	0.003	0.003	0.003	0.003	0.003	0.003	0.003	0.003	0.003	0.003	0.003	0.003	0.003
OR2A13P	OR2A13P	1	chr7:143839101-143840031	olfactory receptor, family 2, subfamily A, member 13 pseudogene	9.71395	0.0206207	0.44408	0.237262	0.101896	0.0179961	0.003	0.003	0.0441305	0.003	0.003	0.003	0.003	0.169245	0.003	0.003	0.003	0.0201614	0.003	0.003	0.003	0.0603943	0.003
OR2A3P	OR2A3P	1	chr7:143854318-143855249	olfactory receptor, family 2, subfamily A, member 3 pseudogene	10.0774	0.0155519	0.0554333	0.533135	0.0203523	0.0179724	0.003	0.003	0.0661045	0.003	0.003	0.003	0.003	0.003	0.003	0.003	0.003	0.003	0.003	0.003	0.003	0.140726	0.003
OR2AO1P	OR2AO1P	1	chr7:143873832-143874609	olfactory receptor, family 2, subfamily AO, member 1 pseudogene	0.945815	0.0158774	0.003	0.003	0.0510684	0.003	0.003	0.003	0.003	0.003	0.0828395	0.003	0.003	0.003	0.0300932	0.003	0.003	0.003	0.003	0.003	0.003	0.102106	0.003
OR2A20P	OR2A20P	1	chr7:143947766-143948696	olfactory receptor, family 2, subfamily A, member 20 pseudogene	1	0.003	0.003	0.003	0.003	0.003	0.203339	0.003	0.003	0.003	0.003	0.003	0.003	0.003	0.003	0.003	0.003	0.003	0.003	0.003	0.003	0.003	0.003
OR2A9P	OR2A9P	1	chr7:143996465-143997395	olfactory receptor, family 2, subfamily A, member 9 pseudogene	8.89011	0.003	0.003	0.0395437	0.0611376	0.003	0.200656	0.003	0.003	0.003	0.003	0.003	0.003	0.003	0.003	0.003	0.003	0.003	0.003	0.003	0.003	0.003	0.003
OR10AH1P	OR10AH1P	1	chr7:5156719-5157718	olfactory receptor, family 10, subfamily AH, member 1 pseudogene	10.961	0.00833442	0.003	0.289885	0.0560357	0.0164926		0.003	0.003	0.0228251	0.003	0.003	0.003	0.003	0.003	0.003	0.0383238	0.018407	0.003	0.003	0.0177948	0.003	0.003
OR7E39P	OR7E39P	1	chr7:6874453-6875425	olfactory receptor, family 7, subfamily E, member 39 pseudogene	0.158287	0.0189529	0.003	0.003	0.003	0.003		0.003	0.003	0.003	0.003	0.0195393	0.003	0.003	0.003	0.171019	0.003	0.003	0.003	0.003	0.0736883	0.003	0.003
OR7E136P	OR7E136P	1	chr7:6906286-6907253	olfactory receptor, family 7, subfamily E, member 136 pseudogene	1.57227	0.0161246	0.003	0.0565473	0.0388611	0.003	0.003	0.003	0.062977	0.003	0.003	0.003	0.003	0.003	0.003	0.153016	0.003	0.003	0.003	0.003	0.003	0.003	0.003
OR7E59P	OR7E59P	1	chr7:6919252-6920211	olfactory receptor, family 7, subfamily E, member 59 pseudogene	4.56786	0.00510786	0.0533678	0.003	0.0196281	0.017332	0.003	0.003	0.003	0.003	0.003	0.003	0.003	0.0203408	0.003	0.003	0.003	0.0193849	0.003	0.003	0.003	0.003	0.003
OR7E7P	OR7E7P	1	chr7:97576294-97577301	olfactory receptor, family 7, subfamily E, member 7 pseudogene	4.48078	0.185346	1.15832	1.0228	0.536488	0.604372	0.18094	0.0405981	0.774942	0.120872	0.334618	0.149483	0.231232	0.11473	0.003	0.0726869	0.36044	0.240379	0.179989	0.003	0.133106	0.203464	0.003
OR7E38P	OR7E38P	1	chr7:97595403-97596389	olfactory receptor, family 7, subfamily E, member 38 pseudogene	3.75611	0.962932	5.57102	2.40885	2.55361	3.93403		0.688927	2.4232	0.31856	1.78866	0.003	0.830788	1.10508	1.30989	1.67037	0.712596	0.880173	0.927981	0.003	0.918958	0.745588	1.08014
OR7E158P	OR7E158P	1	chr8:11777404-11778304	olfactory receptor, family 7, subfamily E, member 158 pseudogene	13.6889	0.037217	0.289575	0.205891	0.530479	1.0119	0.0108111	0.003	0.003	0.0782448	0.003	0.003	0.003	0.154492	0.003	0.003	0.003	0.0420661	0.003	0.003	0.284669	0.003	0.003
OR7E161P	OR7E161P	1	chr8:11786076-11787072	olfactory receptor, family 7, subfamily E, member 161 pseudogene	8.81082	0.0240969	0.101727	0.436415	0.11248	0.198633	0.109672	0.003	0.0269622	0.035386	0.003	0.003	0.003	0.003	0.003	0.003	0.003	0.003	0.00588696	0.003	0.0813729	0.202943	0.003
OR7E160P	OR7E160P	1	chr8:11891125-11892151	olfactory receptor, family 7, subfamily E, member 160 pseudogene	1	0.003	0.003	0.003	0.003	0.003	0.003	0.003	0.003	0.003	0.003	0.003	0.003	0.003	0.003	0.003	0.003	0.003	0.003	0.003	0.003	0.003	0.003
OR7E8P	OR7E8P	1	chr8:12541648-12542674	olfactory receptor, family 7, subfamily E, member 8 pseudogene	1	0.003	0.003	0.003	0.003	0.003	0.003	0.003	0.003	0.003	0.003	0.003	0.003	0.003	0.003	0.003	0.003	0.003	0.003	0.003	0.003	0.003	0.003
OR7E15P	OR7E15P	1	chr8:12553802-12554773	olfactory receptor, family 7, subfamily E, member 15 pseudogene	0.353472	0.0184395	0.003	0.003	0.003	0.0170714	0.003	0.003	0.003	0.0946427	0.003	0.003	0.003	0.003	0.003	0.019027	0.0198633	0.003	0.0547143	0.003	0.0737846	0.003	0.003
OR7E10P	OR7E10P	1	chr8:12560560-12561547	olfactory receptor, family 7, subfamily E, member 10 pseudogene	2.03489	0.00950649	0.003	0.003	0.0379073	0.0334715	0.003	0.003	0.003	0.003	0.003	0.003	0.0197628	0.003	0.003	0.003	0.003	0.003	0.003	0.003	0.0903411	0.003	0.003
OR6R2P	OR6R2P	1	chr8:21654597-21655408	olfactory receptor, family 6, subfamily R, member 2 pseudogene	1	0.003	0.003	0.003	0.003	0.003		0.003	0.003	0.003	0.003	0.003	0.003	0.003	0.003	0.003	0.003	0.003	0.003	0.003	0.003	0.003	0.003
OR7E125P	OR7E125P	1	chr8:7104140-7105109	olfactory receptor, family 7, subfamily E, member 125 pseudogene	0.680031	0.00700505	0.0100546	0.003	0.003	0.003	0.0495615	0.003	0.0179236	0.0343739	0.00563559	0.003	0.003	0.003	0.003	0.003	0.003	0.00730448	0.0060953	0.003	0.0102747	0.00347315	0.003
OR7E157P	OR7E157P	1	chr8:7449508-7450477	olfactory receptor, family 7, subfamily E, member 157 pseudogene	10.4842	0.00366309	0.00526669	0.0940084	0.003	0.0513428	0.003	0.003	0.00523432	0.00808728	0.00563559	0.003	0.003	0.003	0.003	0.003	0.003	0.00365224	0.003	0.003	0.003	0.003	0.003
OR7E154P	OR7E154P	1	chr8:7562685-7563654	olfactory receptor, family 7, subfamily E, member 154 pseudogene	0.680031	0.00700505	0.0100546	0.003	0.003	0.003	0.148506	0.003	0.0179236	0.0343739	0.00563559	0.003	0.003	0.003	0.003	0.003	0.003	0.00730448	0.0060953	0.003	0.0102747	0.00347315	0.003
OR7E96P	OR7E96P	1	chr8:7897500-7898469	olfactory receptor, family 7, subfamily E, member 96 pseudogene	9.30576	0.00366309	0.00526669	0.0752067	0.0387636	0.0171143	0.003	0.003	0.00523432	0.00808728	0.00563559	0.003	0.003	0.003	0.003	0.003	0.003	0.00365224	0.003	0.003	0.003	0.003	0.003
OR13D2P	OR13D2P	1	chr9:107352297-107353231	olfactory receptor, family 13, subfamily D, member 2 pseudogene	1	0.003	0.003	0.003	0.003	0.003	0.003	0.003	0.003	0.003	0.003	0.003	0.003	0.003	0.003	0.003	0.003	0.003	0.003	0.003	0.003	0.003	0.003
OR13I1P	OR13I1P	1	chr9:107392034-107393299	olfactory receptor, family 13, subfamily I, member 1 pseudogene	0.567035	0.00529068	0.003	0.003	0.003	0.003		0.003	0.0150846	0.003	0.003	0.003	0.003	0.003	0.003	0.003	0.003	0.0275662	0.003	0.003	0.003	0.003	0.003
OR13C1P	OR13C1P	1	chr9:107419037-107419997	olfactory receptor, family 13, subfamily C, member 1 pseudogene	21.2339	0.003	0.213187	0.019017	0.0196032	0.003	0.003	0.003	0.003	0.003	0.003	0.003	0.003	0.003	0.003	0.003	0.003	0.003	0.003	0.003	0.003	0.003	0.003
OR13D3P	OR13D3P	1	chr9:107484615-107485549	olfactory receptor, family 13, subfamily D, member 3 pseudogene	1.81791	0.00664714	0.003	0.0393356	0.003	0.003	0.003	0.003	0.003	0.003	0.0433148	0.003	0.003	0.0210394	0.003	0.003	0.003	0.003	0.003	0.003	0.003	0.003	0.003
OR1H1P	OR1H1P	1	chr9:125370142-125371076	olfactory receptor, family 1, subfamily H, member 1 pseudogene	5.64629	0.0302022	0.276022	0.0983389	0.18245	0.125311	0.0681159	0.003	0.003	0.003	0.003	0.003	0.003	0.003	0.003	0.003	0.003	0.003	0.402468	0.003	0.0387676	0.003	0.003
OR13E1P	OR13E1P	1	chr9:35859021-35859977	olfactory receptor, family 13, subfamily E, member 1 pseudogene	2.22625	0.468943	1.98252	0.821916	0.866942	0.504555	0.584624	0.151757	0.170402	2.72713	0.504529	0.458992	0.164638	0.245066	0.003	0.252298	0.003	0.97312	0.762719	0.412541	0.282227	0.388669	0.003
OR13C6P	OR13C6P	1	chr9:35991335-35992282	olfactory receptor, family 13, subfamily C, member 6 pseudogene	0.374067	0.00801994	0.003	0.003	0.003	0.003	0.003	0.003	0.003	0.003	0.003	0.003	0.0833191	0.003	0.003	0.003	0.003	0.003	0.003	0.003	0.003	0.003	0.003
OR13C7P	OR13C7P	1	chr9:36002908-36003864	olfactory receptor, family 13, subfamily C, member 7 pseudogene	0.371839	0.00806801	0.003	0.003	0.003	0.003	0.003	0.003	0.003	0.003	0.0840882	0.003	0.003	0.003	0.003	0.003	0.003	0.003	0.003	0.003	0.003	0.003	0.003
OR2S1P	OR2S1P	1	chr9:36013180-36014127	olfactory receptor, family 2, subfamily S, member 1 pseudogene	0.443624	0.125223	0.108468	0.0386739	0.0398642	0.0352016	0.204573	0.285257	0.043118	0.0977084	0.0638322	0.003	0.166638	0.186032	0.0695652	0.530369	0.164054	0.0393976	0.0941444	0.003	0.0380873	0.216365	0.003
OR2AM1P	OR2AM1P	1	chr9:36021707-36022112	olfactory receptor, family 2, subfamily AM, member 1 pseudogene	1	0.003	0.003	0.003	0.003	0.003	0.003	0.003	0.003	0.003	0.003	0.003	0.003	0.003	0.003	0.003	0.003	0.003	0.003	0.003	0.003	0.003	0.003
OR7E31P	OR7E31P	1	chr9:92978295-92979240	olfactory receptor, family 7, subfamily E, member 31 pseudogene	0.37624	0.00797363	0.003	0.003	0.003	0.003	0.0376362	0.003	0.064852	0.003	0.003	0.003	0.003	0.0207261	0.003	0.003	0.003	0.003	0.003	0.003	0.003	0.003	0.003
OR7E116P	OR7E116P	1	chr9:92994379-92995405	olfactory receptor, family 7, subfamily E, member 116 pseudogene	2.1777	0.0072627	0.003	0.003	0.0542638	0.003	0.0759985	0.003	0.003	0.003	0.003	0.003	0.003	0.003	0.003	0.003	0.003	0.0712032	0.003	0.003	0.003	0.003	0.003
OR7E109P	OR7E109P	1	chr9:93504783-93505730	olfactory receptor, family 7, subfamily E, member 109 pseudogene	0.392759	0.00763828	0.003	0.003	0.003	0.003	0.003	0.003	0.003	0.003	0.0425548	0.003	0.003	0.003	0.003	0.003	0.003	0.003	0.0376577	0.003	0.003	0.003	0.003
OR7E108P	OR7E108P	1	chr9:93513499-93514522	olfactory receptor, family 7, subfamily E, member 108 pseudogene	3.17444	0.00713049	0.003	0.0352111	0.0363034	0.0160269		0.003	0.003	0.003	0.003	0.003	0.003	0.003	0.003	0.003	0.003	0.003	0.003	0.003	0.0690879	0.003	0.003
OR4W1P	OR4W1P	1	chrX:125636853-125637201	olfactory receptor, family 4, subfamily W, member 1 pseudogene	1	0.003	0.003	0.003	0.003	0.003		0.003	0.003	0.003	0.003	0.003	0.003	0.003	0.003	0.003	0.003	0.003	0.003	0.003	0.003	0.003	0.003
OR11Q1P	OR11Q1P	1	chrX:130338068-130339017	olfactory receptor, family 11, subfamily Q, member 1 pseudogene	0.750089	0.00399953	0.003	0.003	0.003	0.003	0.003	0.003	0.003	0.003	0.003	0.003	0.003	0.003	0.003	0.003	0.003	0.003	0.003	0.003	0.0189924	0.003	0.003
OR11N1P	OR11N1P	1	chrX:130458307-130459287	olfactory receptor, family 11, subfamily N, member 1 pseudogene	0.701903	0.00427409	0.003	0.003	0.003	0.003	0.003	0.003	0.003	0.0233855	0.003	0.003	0.003	0.003	0.003	0.003	0.003	0.003	0.003	0.003	0.003	0.003	0.003
OR5AW1P	OR5AW1P	1	chrX:130475502-130476426	olfactory receptor, family 5, subfamily AW, member 1 pseudogene	0.742416	0.00404086	0.003	0.003	0.003	0.003	0.003	0.003	0.003	0.003	0.003	0.003	0.003	0.003	0.003	0.003	0.003	0.003	0.003	0.003	0.0196538	0.003	0.003
OR5BH1P	OR5BH1P	1	chrX:130532022-130532931	olfactory receptor, family 5, subfamily BH, member 1 pseudogene	1.78522	0.00410831	0.003	0.0203369	0.003	0.003	0.003	0.003	0.003	0.003	0.003	0.003	0.003	0.003	0.003	0.003	0.003	0.003	0.003	0.003	0.003	0.0207329	0.003
OR1AA1P	OR1AA1P	1	chrX:130558274-130559242	olfactory receptor, family 1, subfamily AA, member 1 pseudogene	0.440309	0.00681339	0.003	0.003	0.003	0.003	0.003	0.0640143	0.003	0.003	0.003	0.003	0.003	0.003	0.003	0.003	0.003	0.003	0.003	0.003	0.003	0.003	0.003
OR13K1P	OR13K1P	1	chrX:130696702-130697786	olfactory receptor, family 13, subfamily K, member 1 pseudogene	1	0.003	0.003	0.003	0.003	0.003	0.003	0.003	0.003	0.003	0.003	0.003	0.003	0.003	0.003	0.003	0.003	0.003	0.003	0.003	0.003	0.003	0.003
OR7L1P	OR7L1P	1	chrX:130730094-130731177	olfactory receptor, family 7, subfamily L, member 1 pseudogene	1	0.003	0.003	0.003	0.003	0.003	0.003	0.003	0.003	0.003	0.003	0.003	0.003	0.003	0.003	0.003	0.003	0.003	0.003	0.003	0.003	0.003	0.003
OR2AF1P	OR2AF1P	1	chrX:130753047-130753937	olfactory receptor, family 2, subfamily AF, member 1 pseudogene	1	0.003	0.003	0.003	0.003	0.003	0.003	0.003	0.003	0.003	0.003	0.003	0.003	0.003	0.003	0.003	0.003	0.003	0.003	0.003	0.003	0.003	0.003
OR3B1P	OR3B1P	1	chrX:153887006-153887935	olfactory receptor, family 3, subfamily B, member 1 pseudogene	1	0.003	0.003	0.003	0.003	0.003	0.003	0.003	0.003	0.003	0.003	0.003	0.003	0.003	0.003	0.003	0.003	0.003	0.003	0.003	0.003	0.003	0.003
